# Supplementary material for: Phylogenetic Analysis and DNA-based Species Confirmation in Anopheles (Nyssorhynchus)
Source: PubMed Central journal article supplement (PMC3563636; doi:10.1371/journal.pone.0054063), 2013-02-04

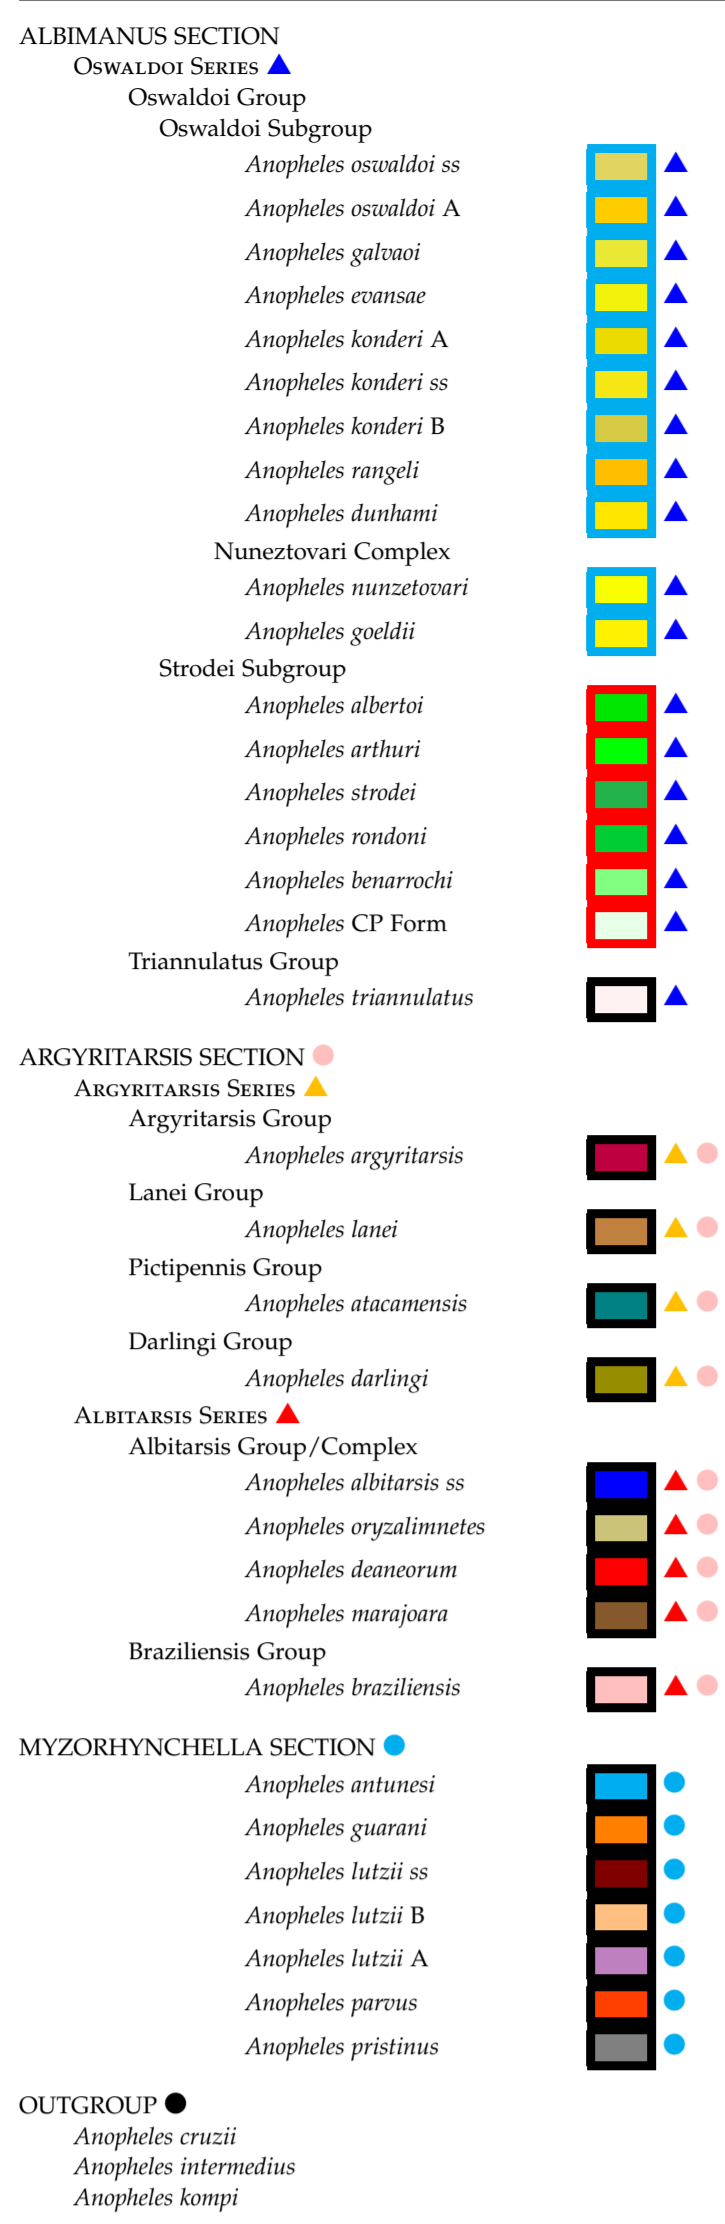

**Figure S1A-E.** Bayesian analyses using both MrBayes and p4 were run for 10 million generations, with each codon position of each gene given its own model characteristics in a multi-partition model as described in Supplemental Tables S2A and S2B (although the COI second codon position 2 had no informative sites and so was not used). MrBayes used an MCMCMC with 4 chains; p4 used a single chain (i.e. no MCMCMC). MrBayes runs collected 1001 samples, and used a burnin of 751 samples. The p4 analysis collected 2000 samples and used a burnin of 1500 samples. Two runs were made using MrBayes, and 5 runs with p4; separate results can be seen in Supplemental Tables S4 and S6. The figures here (S1A-E) are consensus trees made from pooled samples. Internal nodes are decorated with posterior probabilities, expressed as percent.

**Figure S1F-S1G.** K<sub>2P</sub>/NJ trees. Pairwise K<sub>2P</sub> distances were used to make a neighbor-joining tree, as shown. Negative branch lengths were collapsed to zero length.

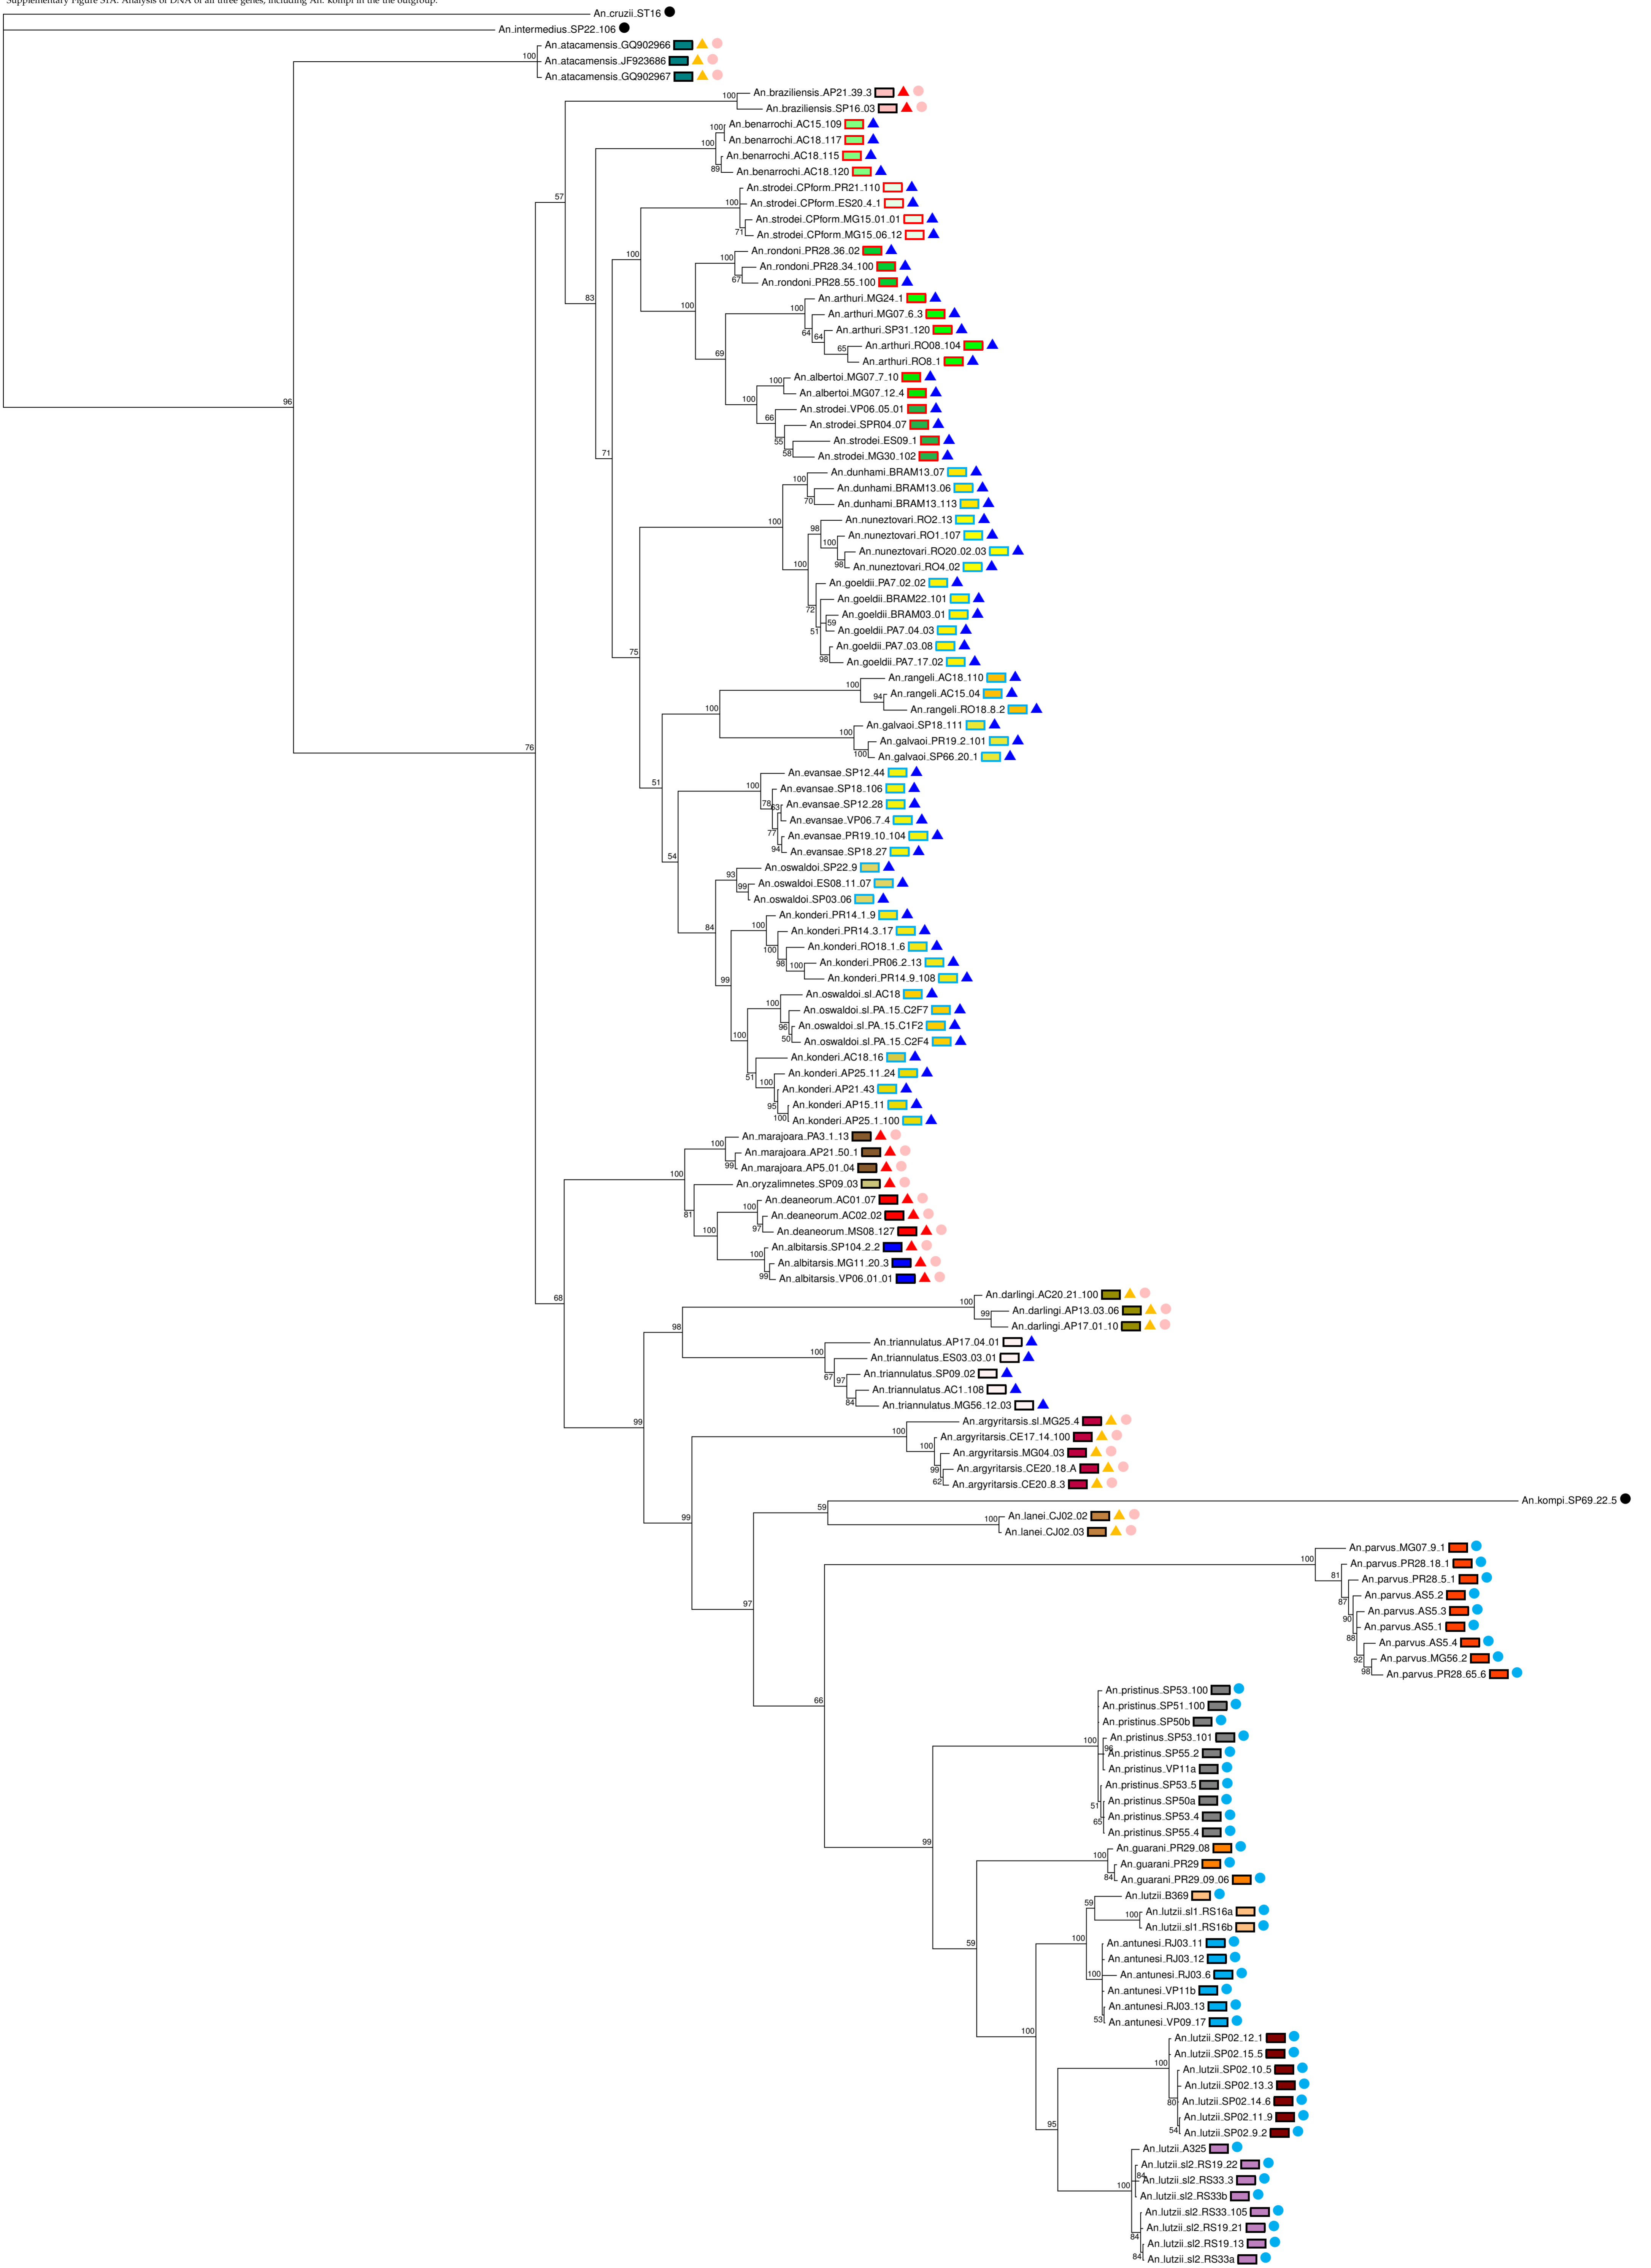

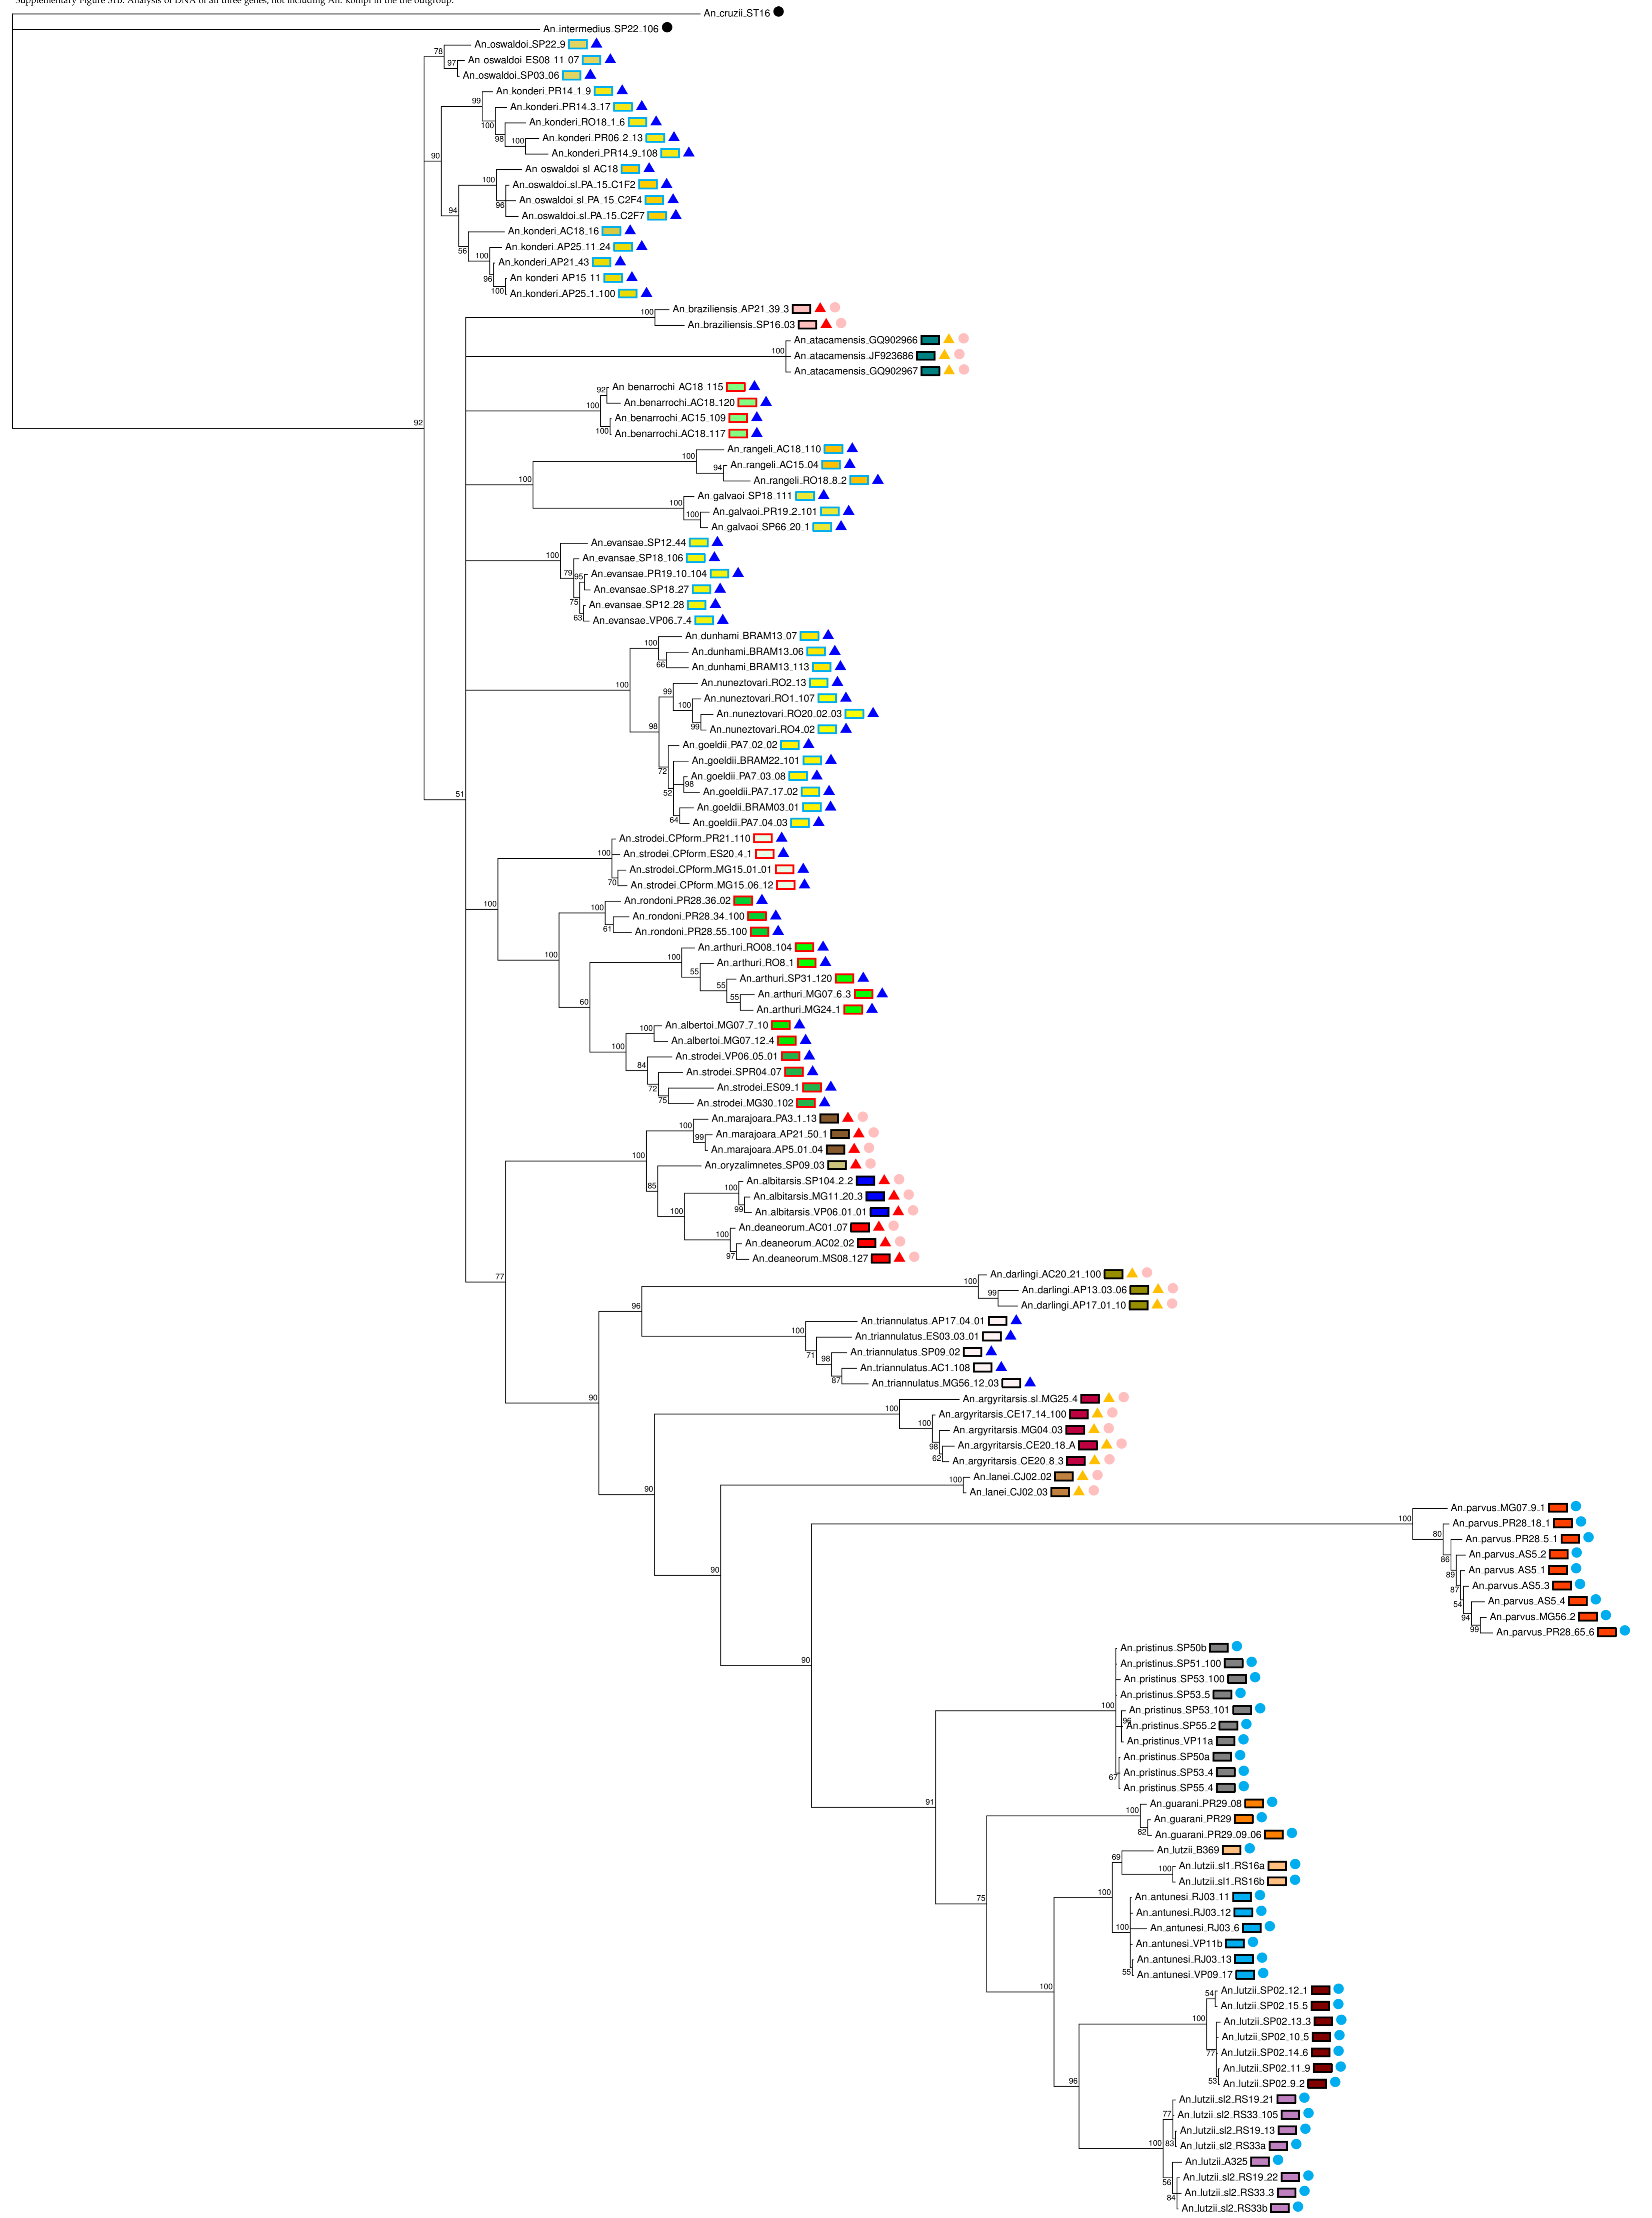

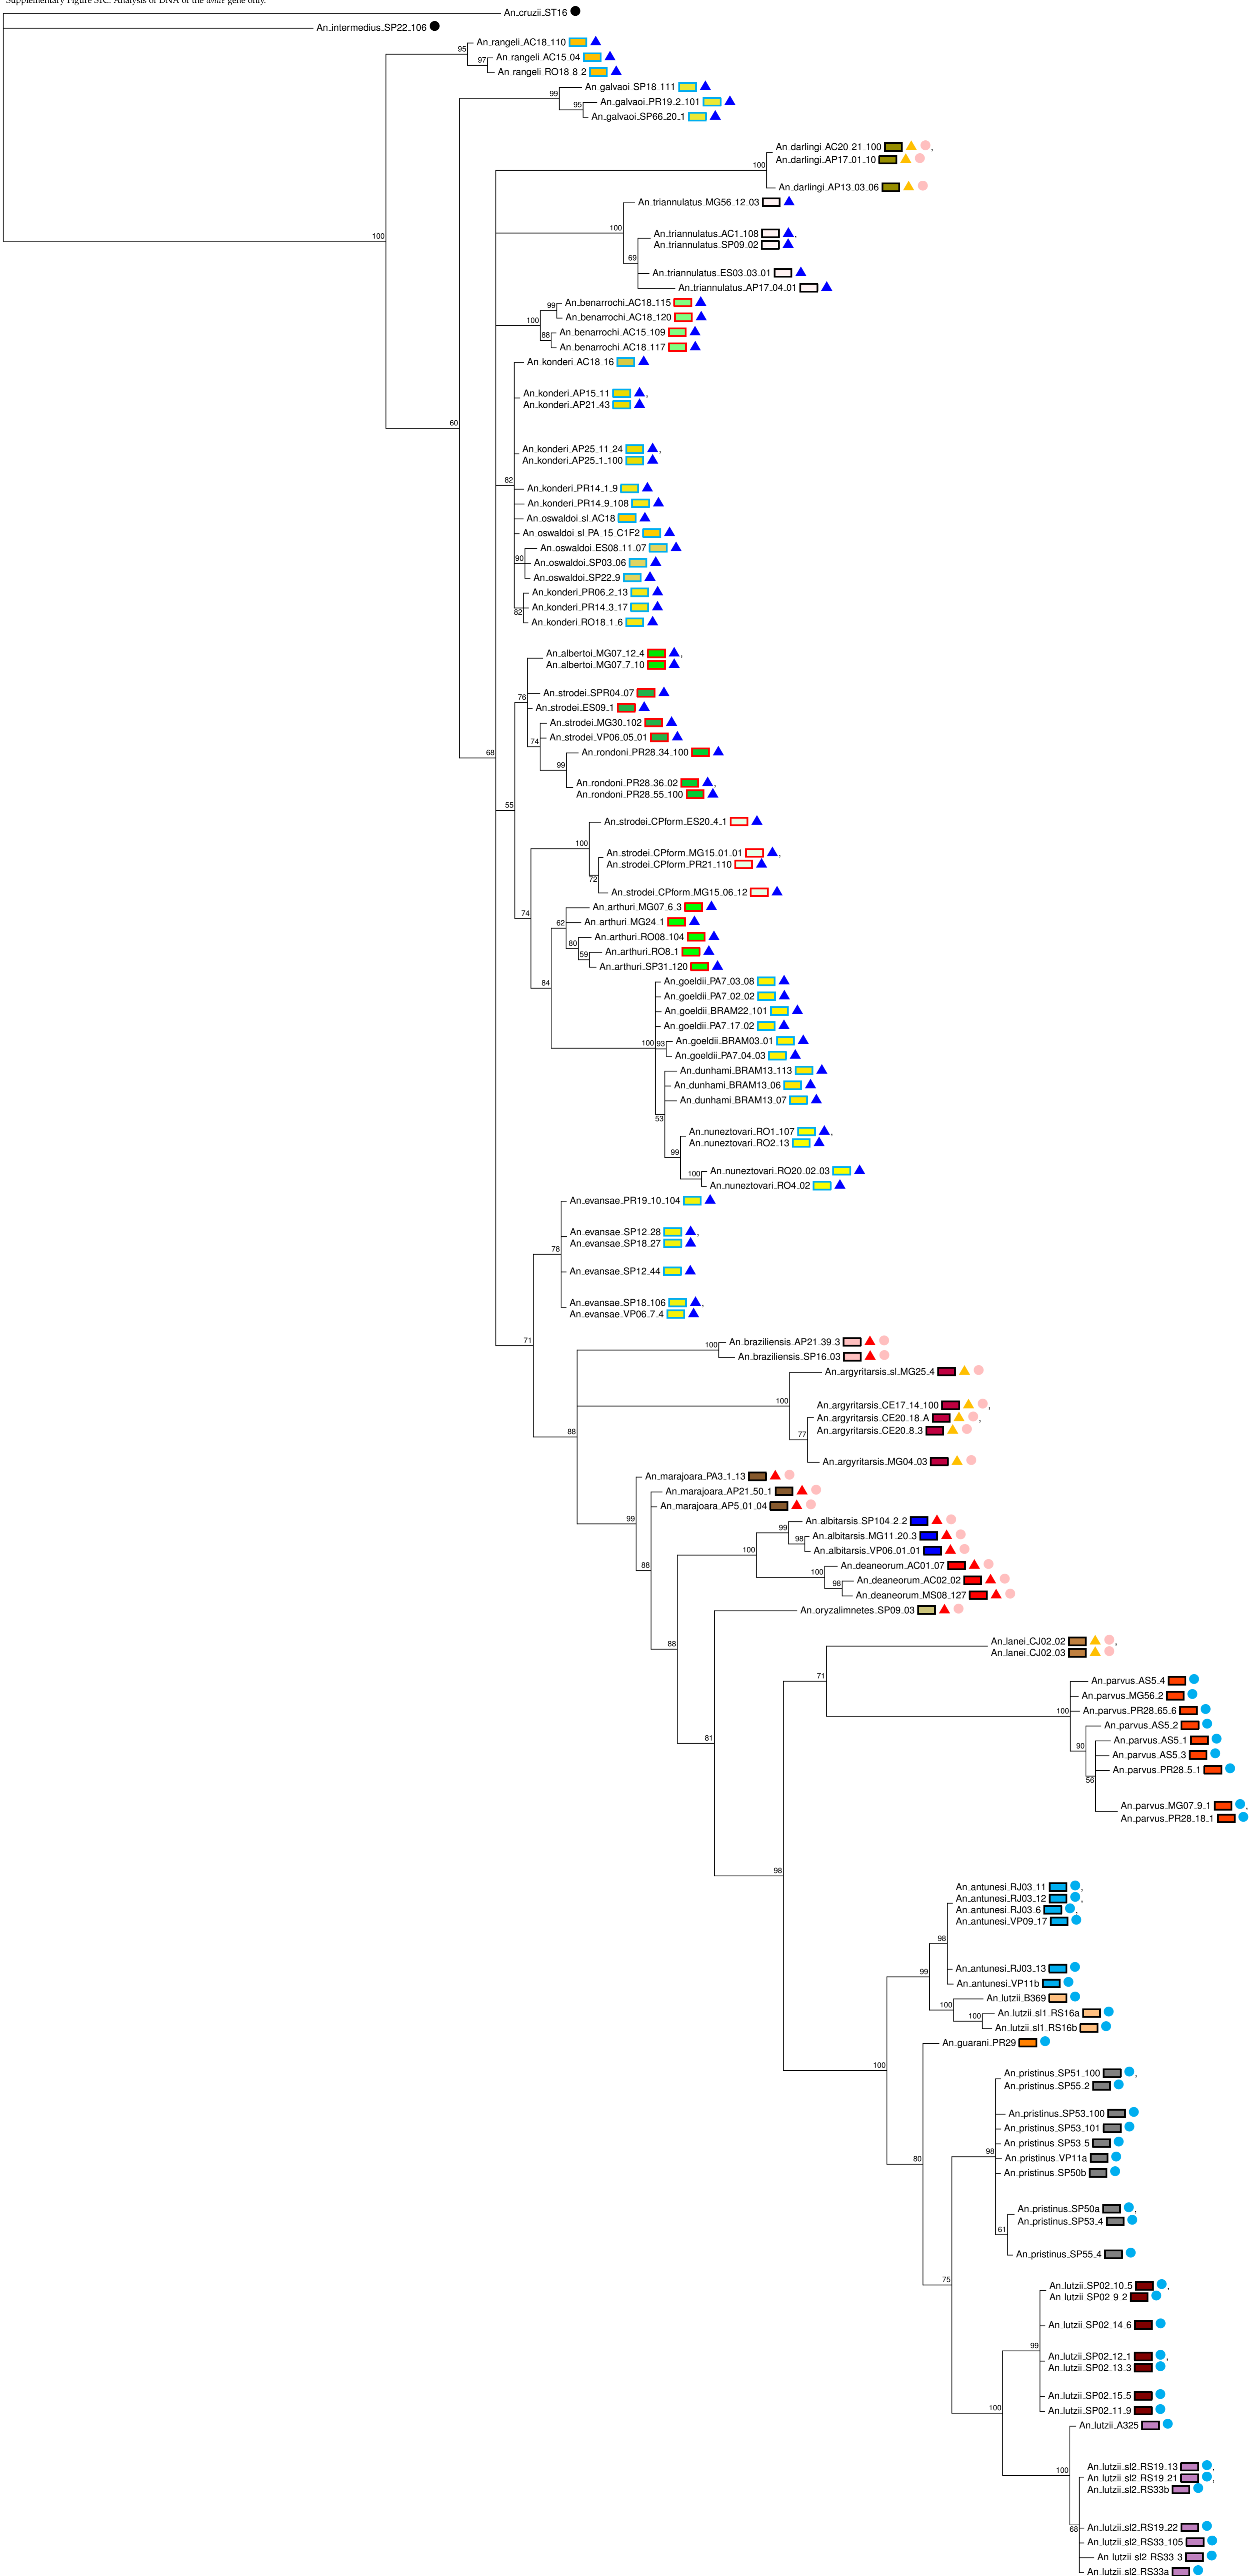

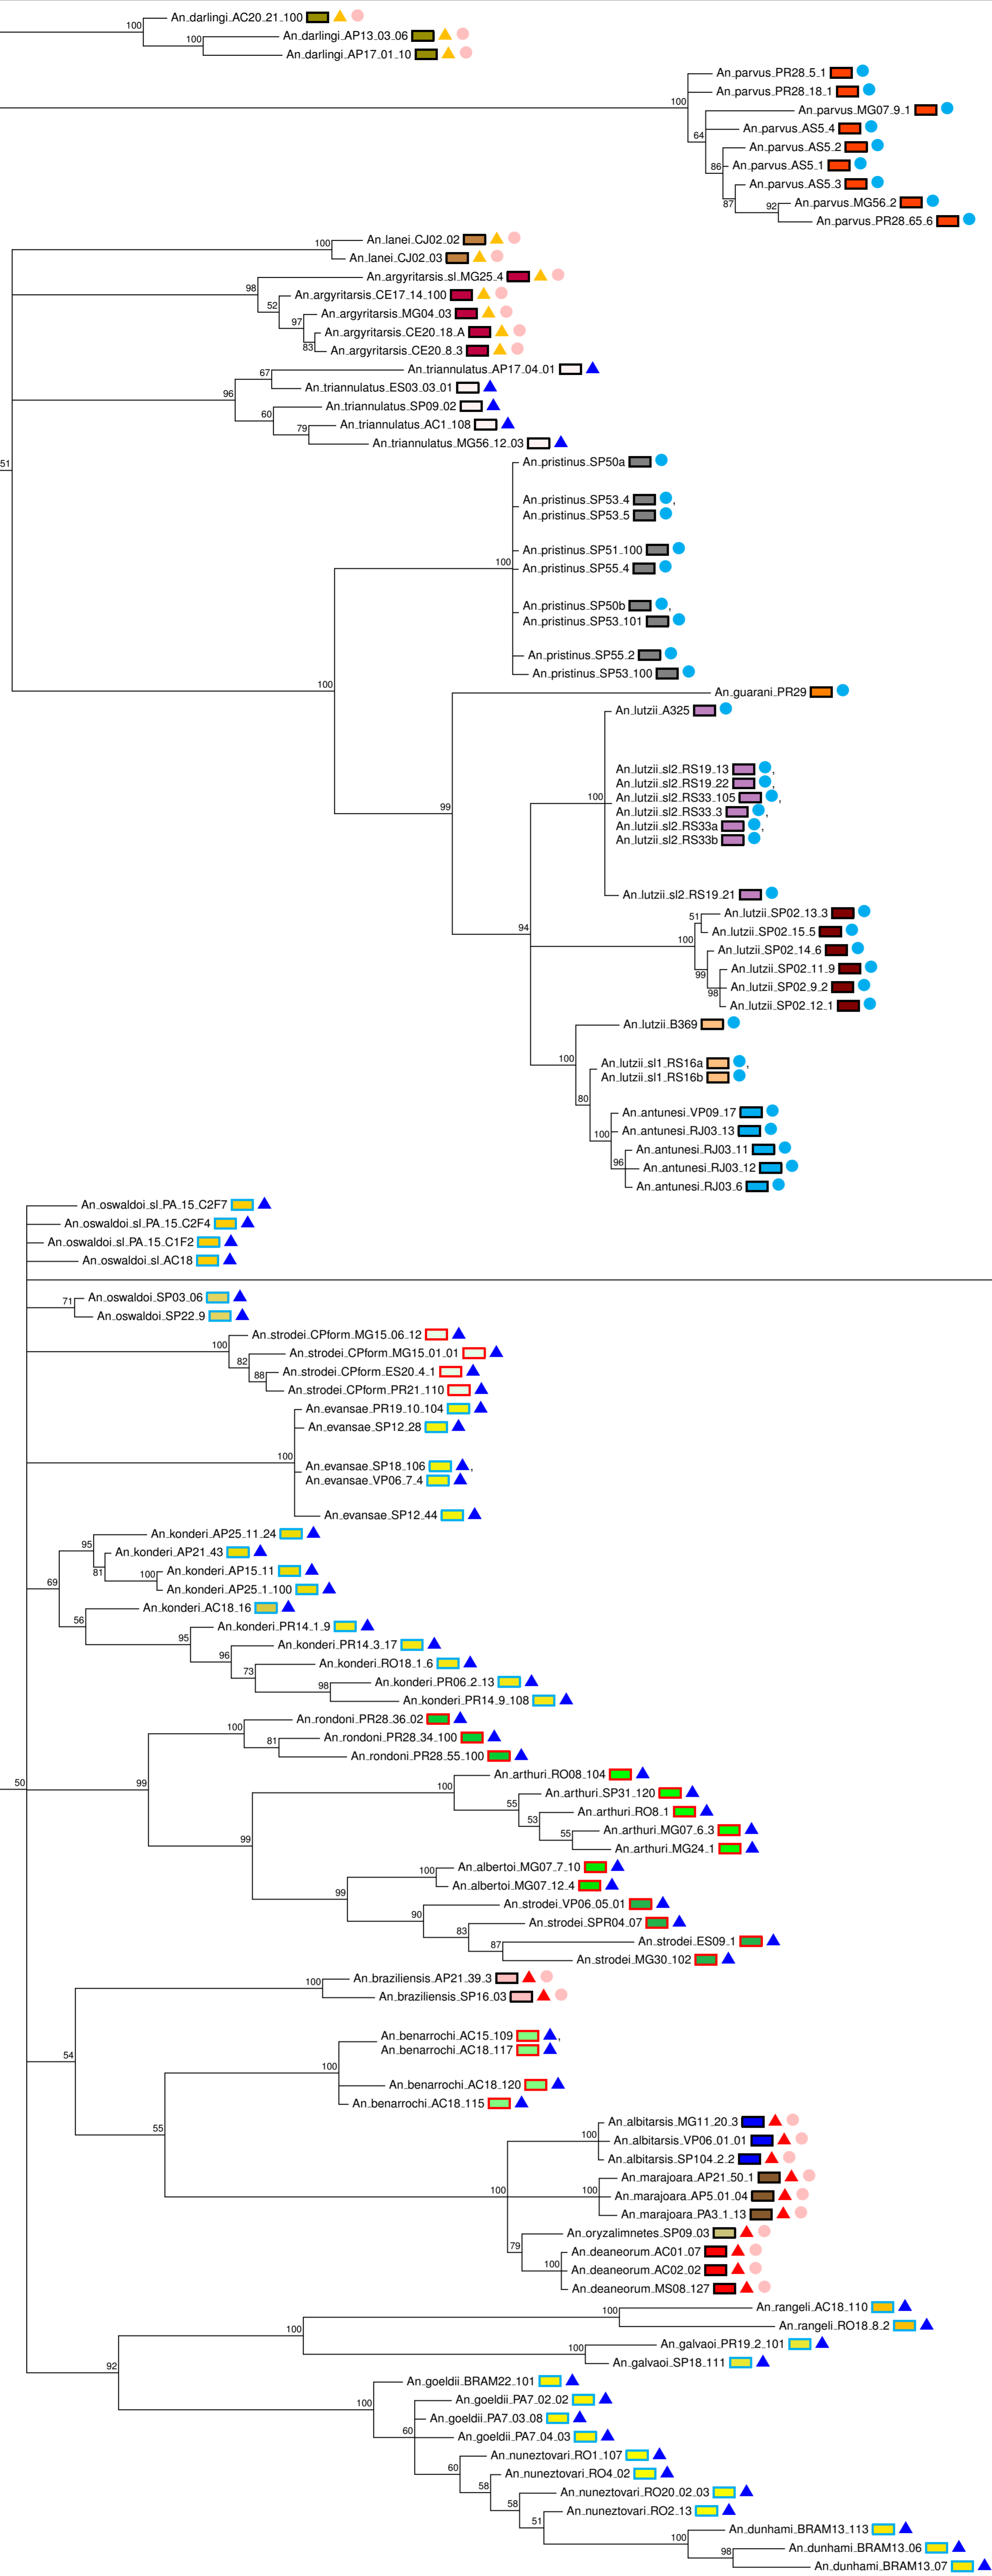

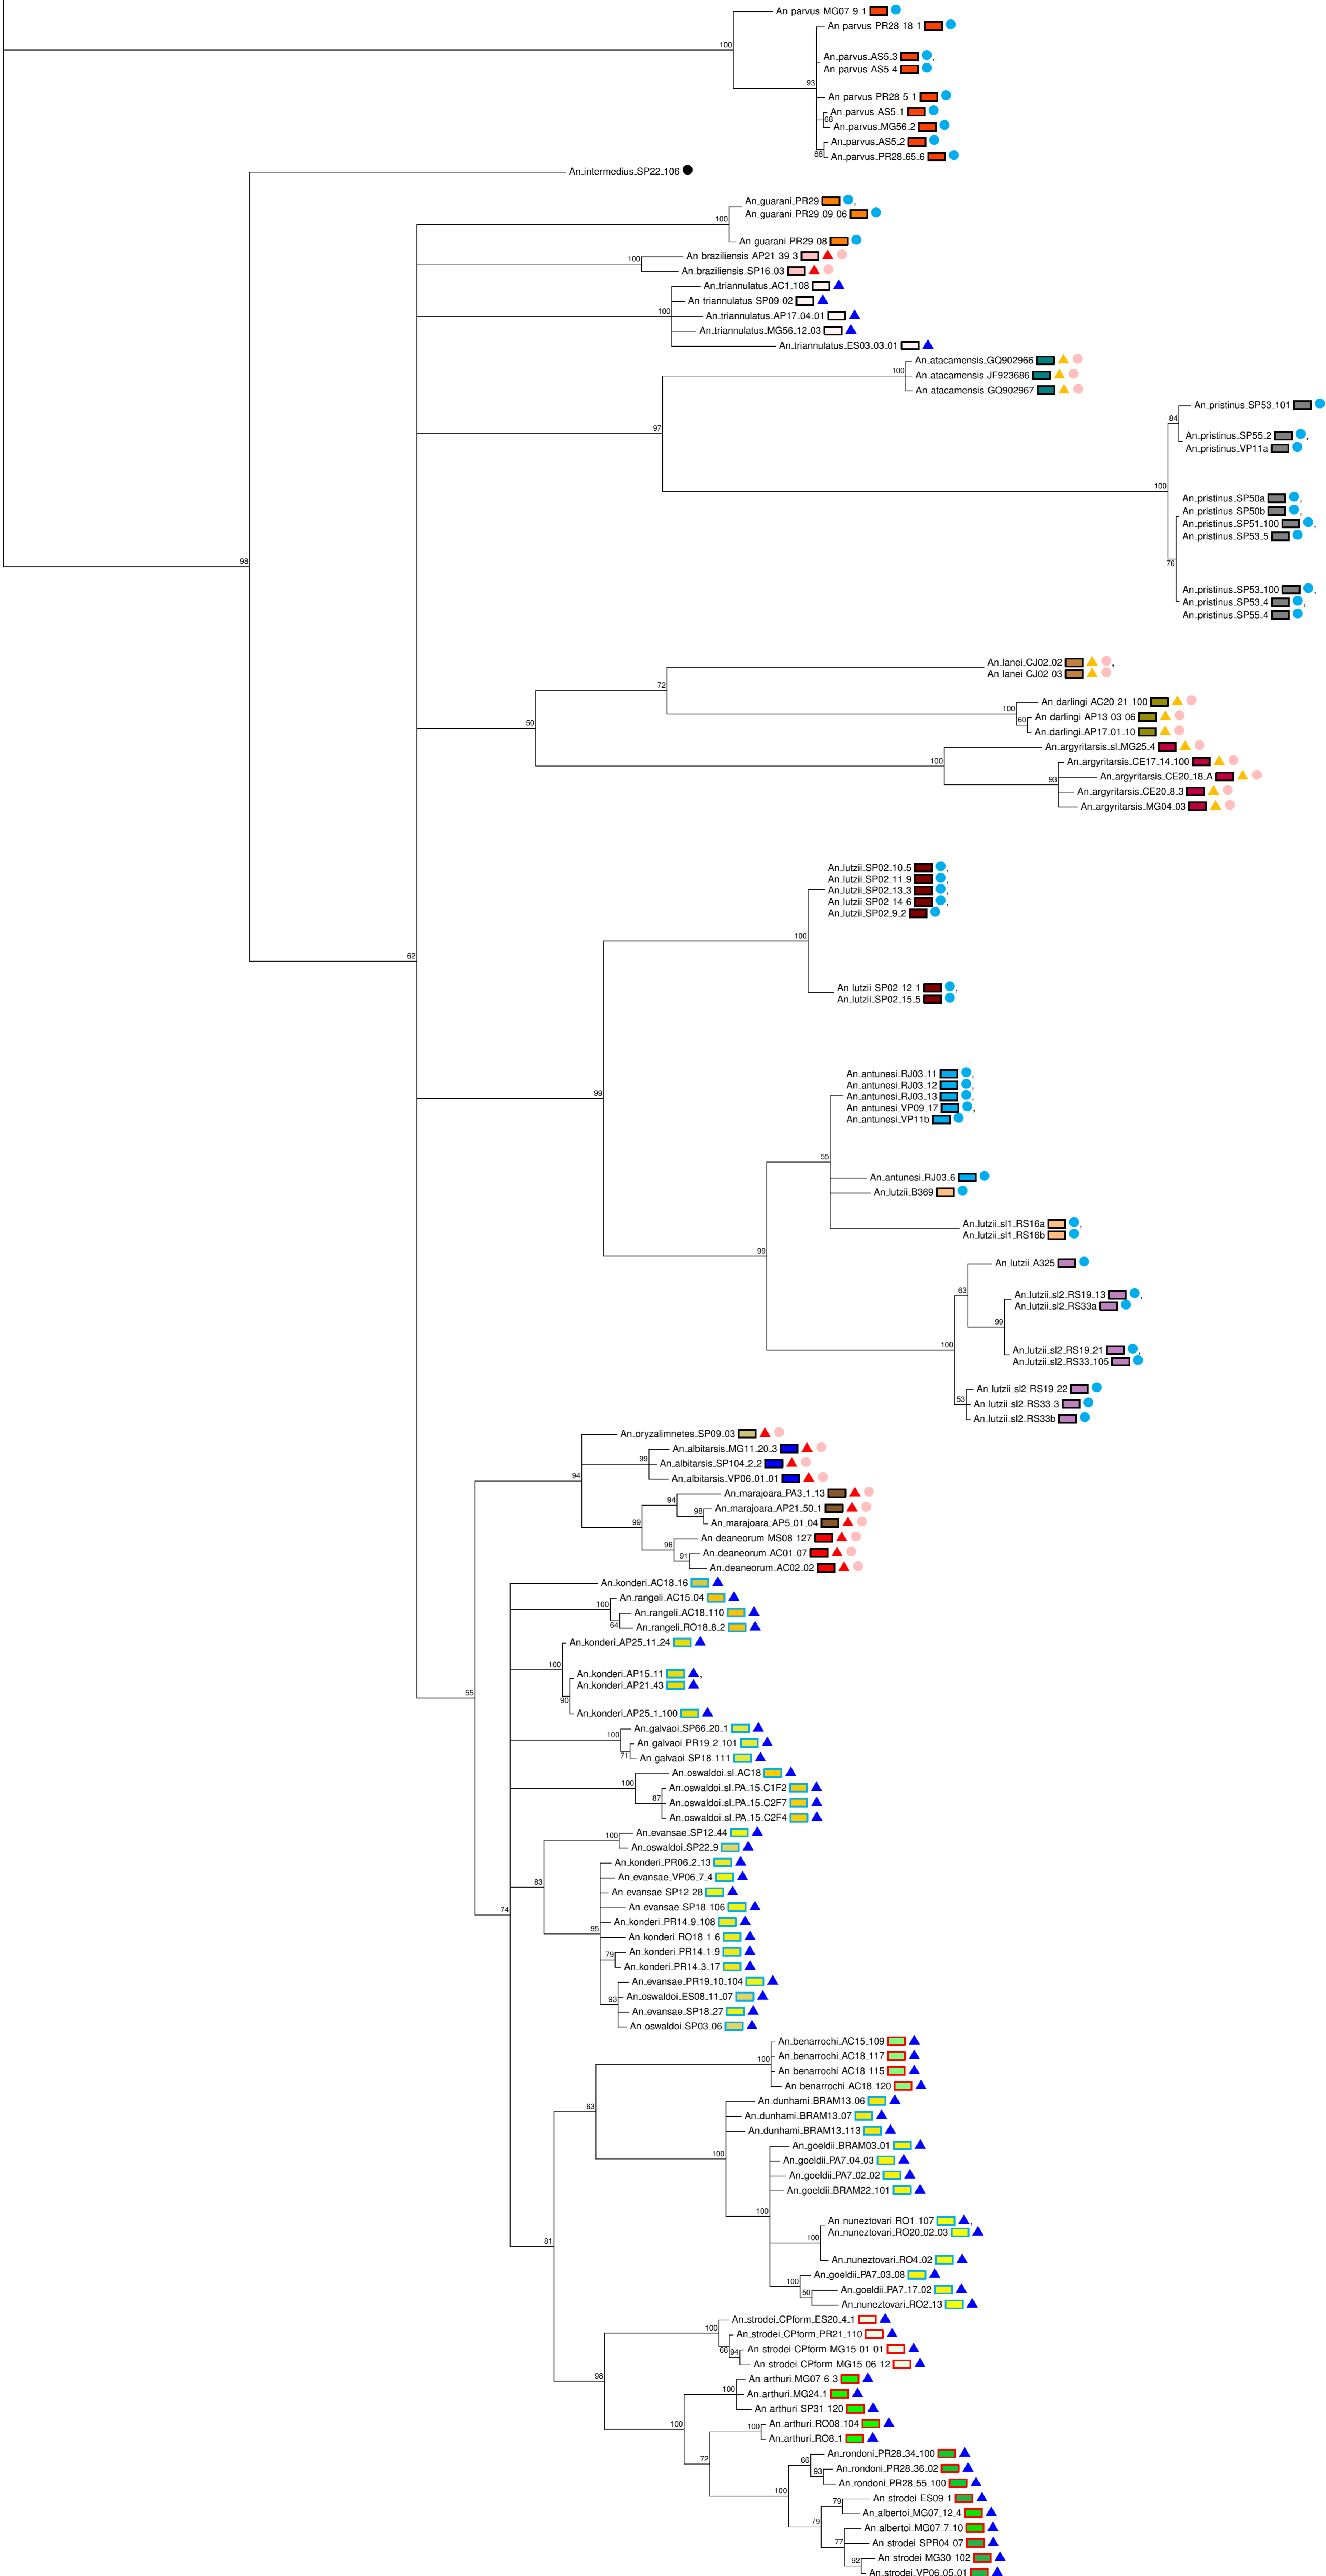

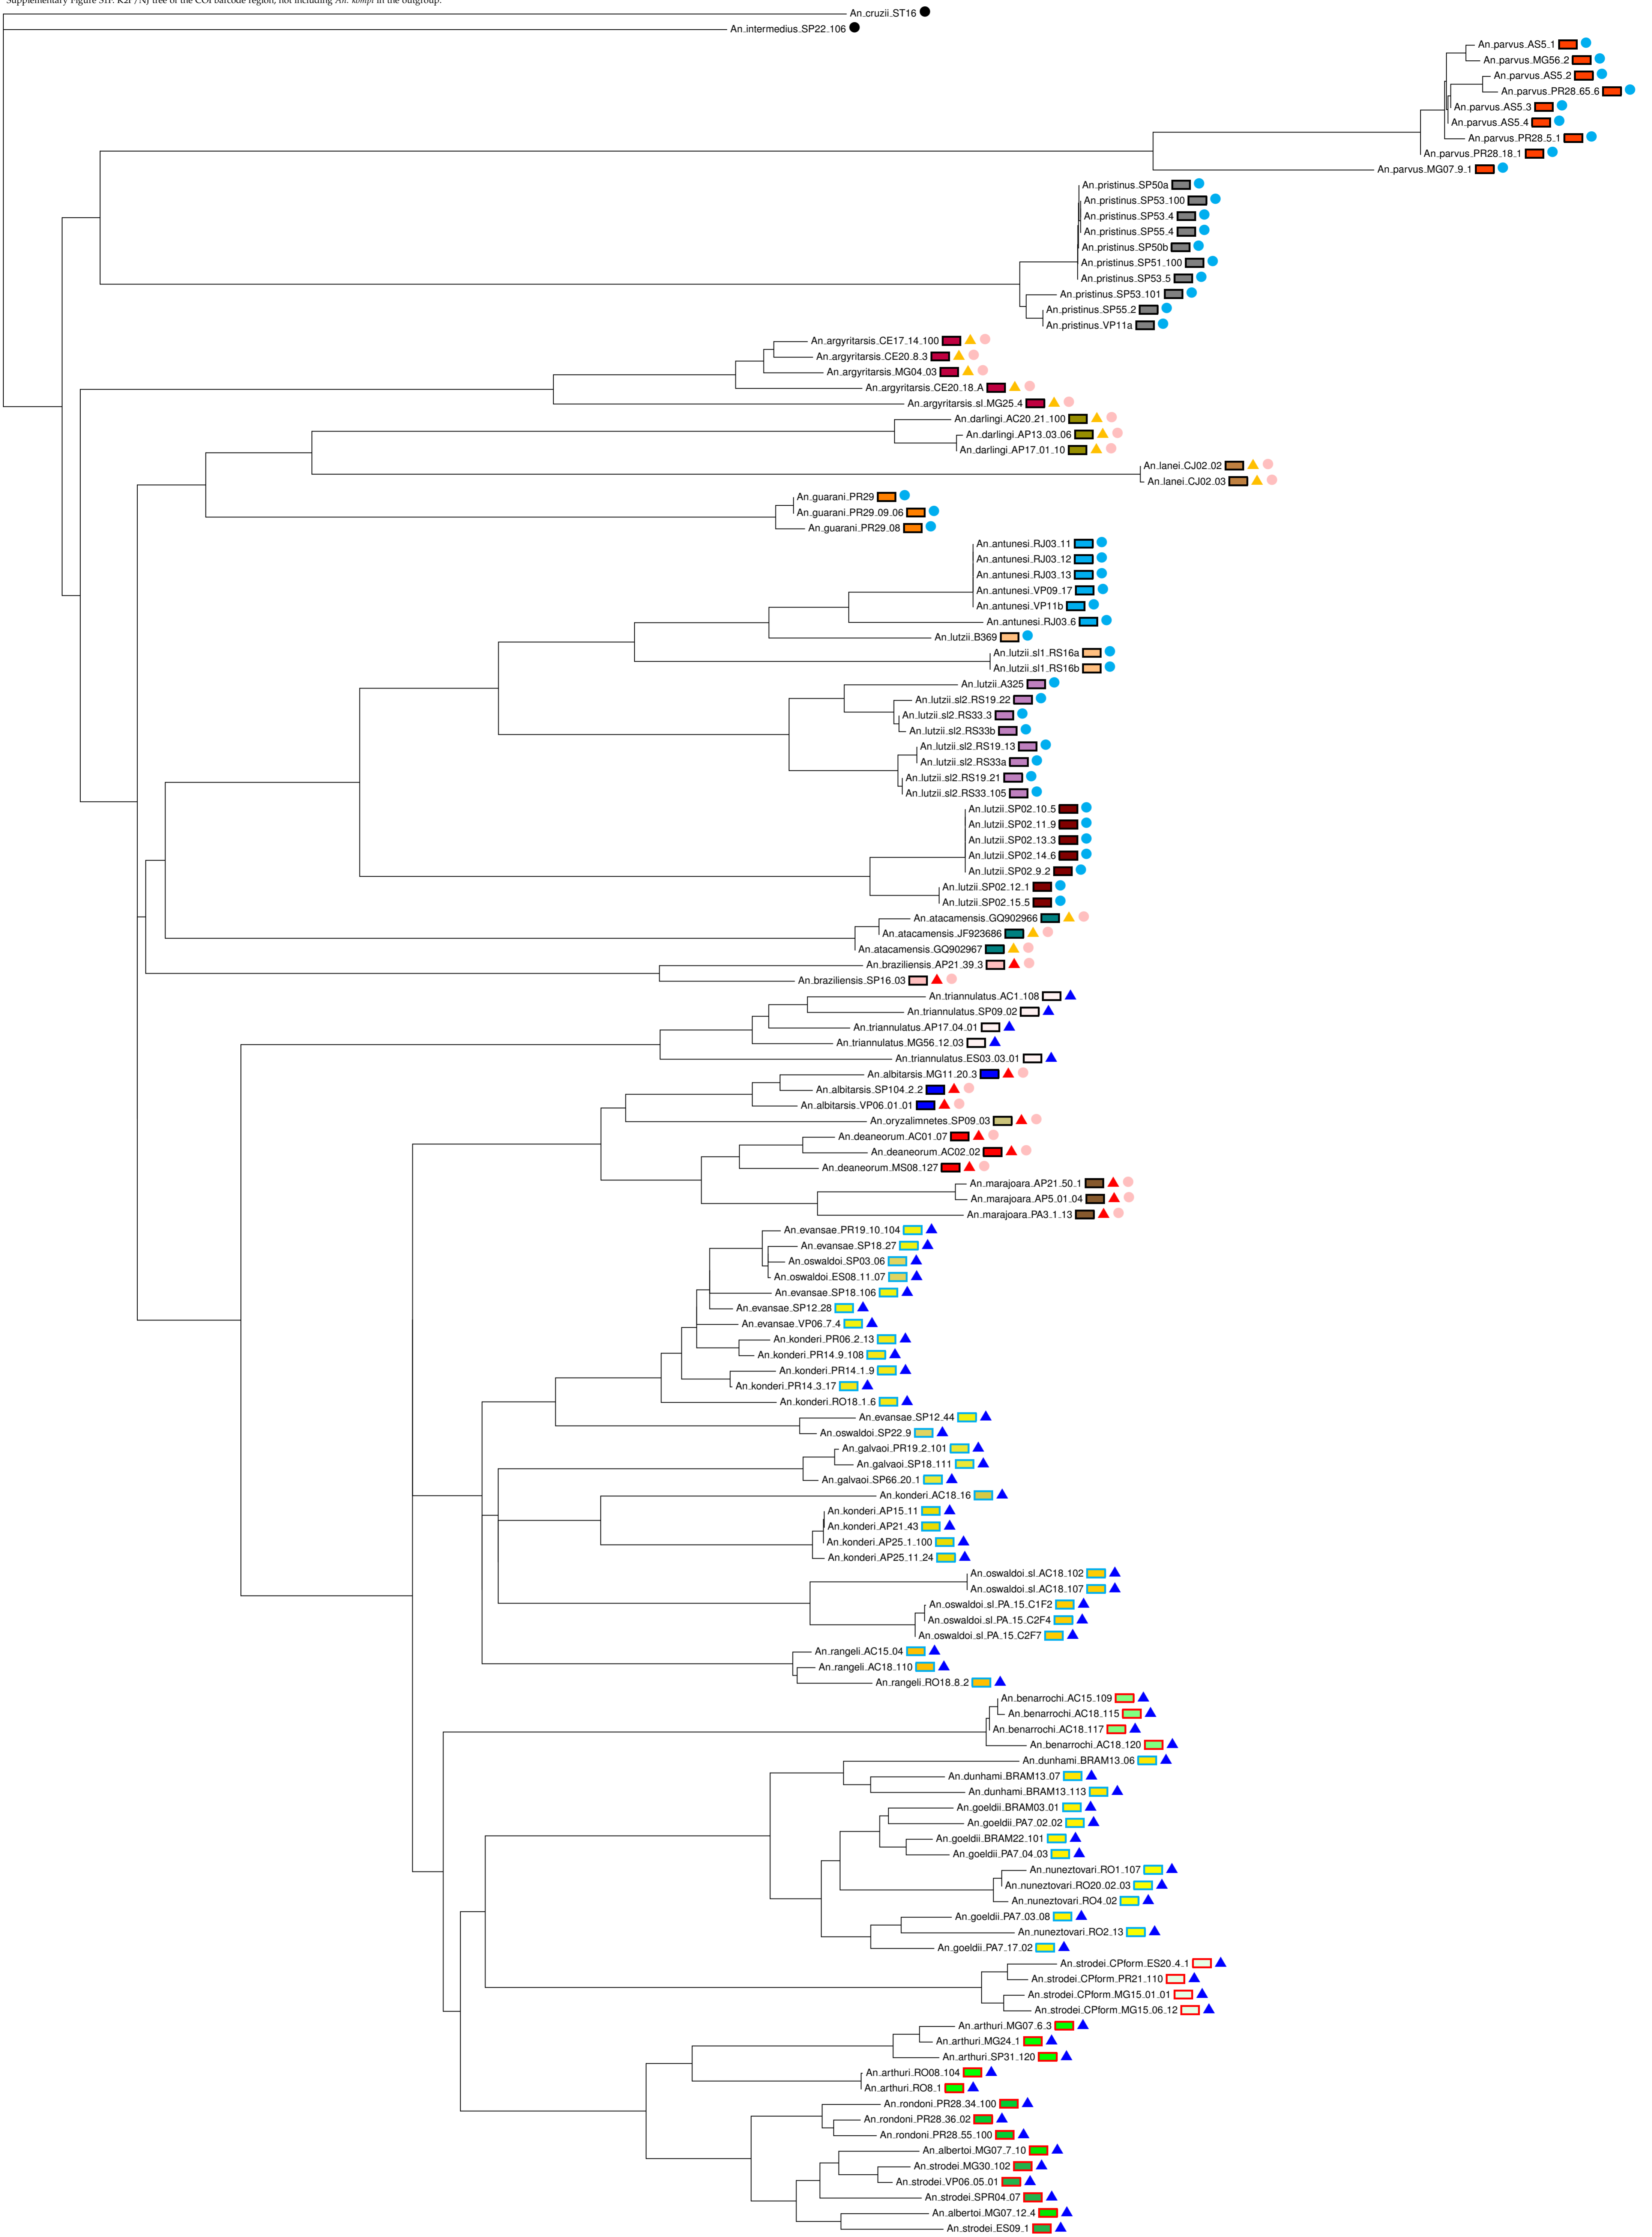

0.02

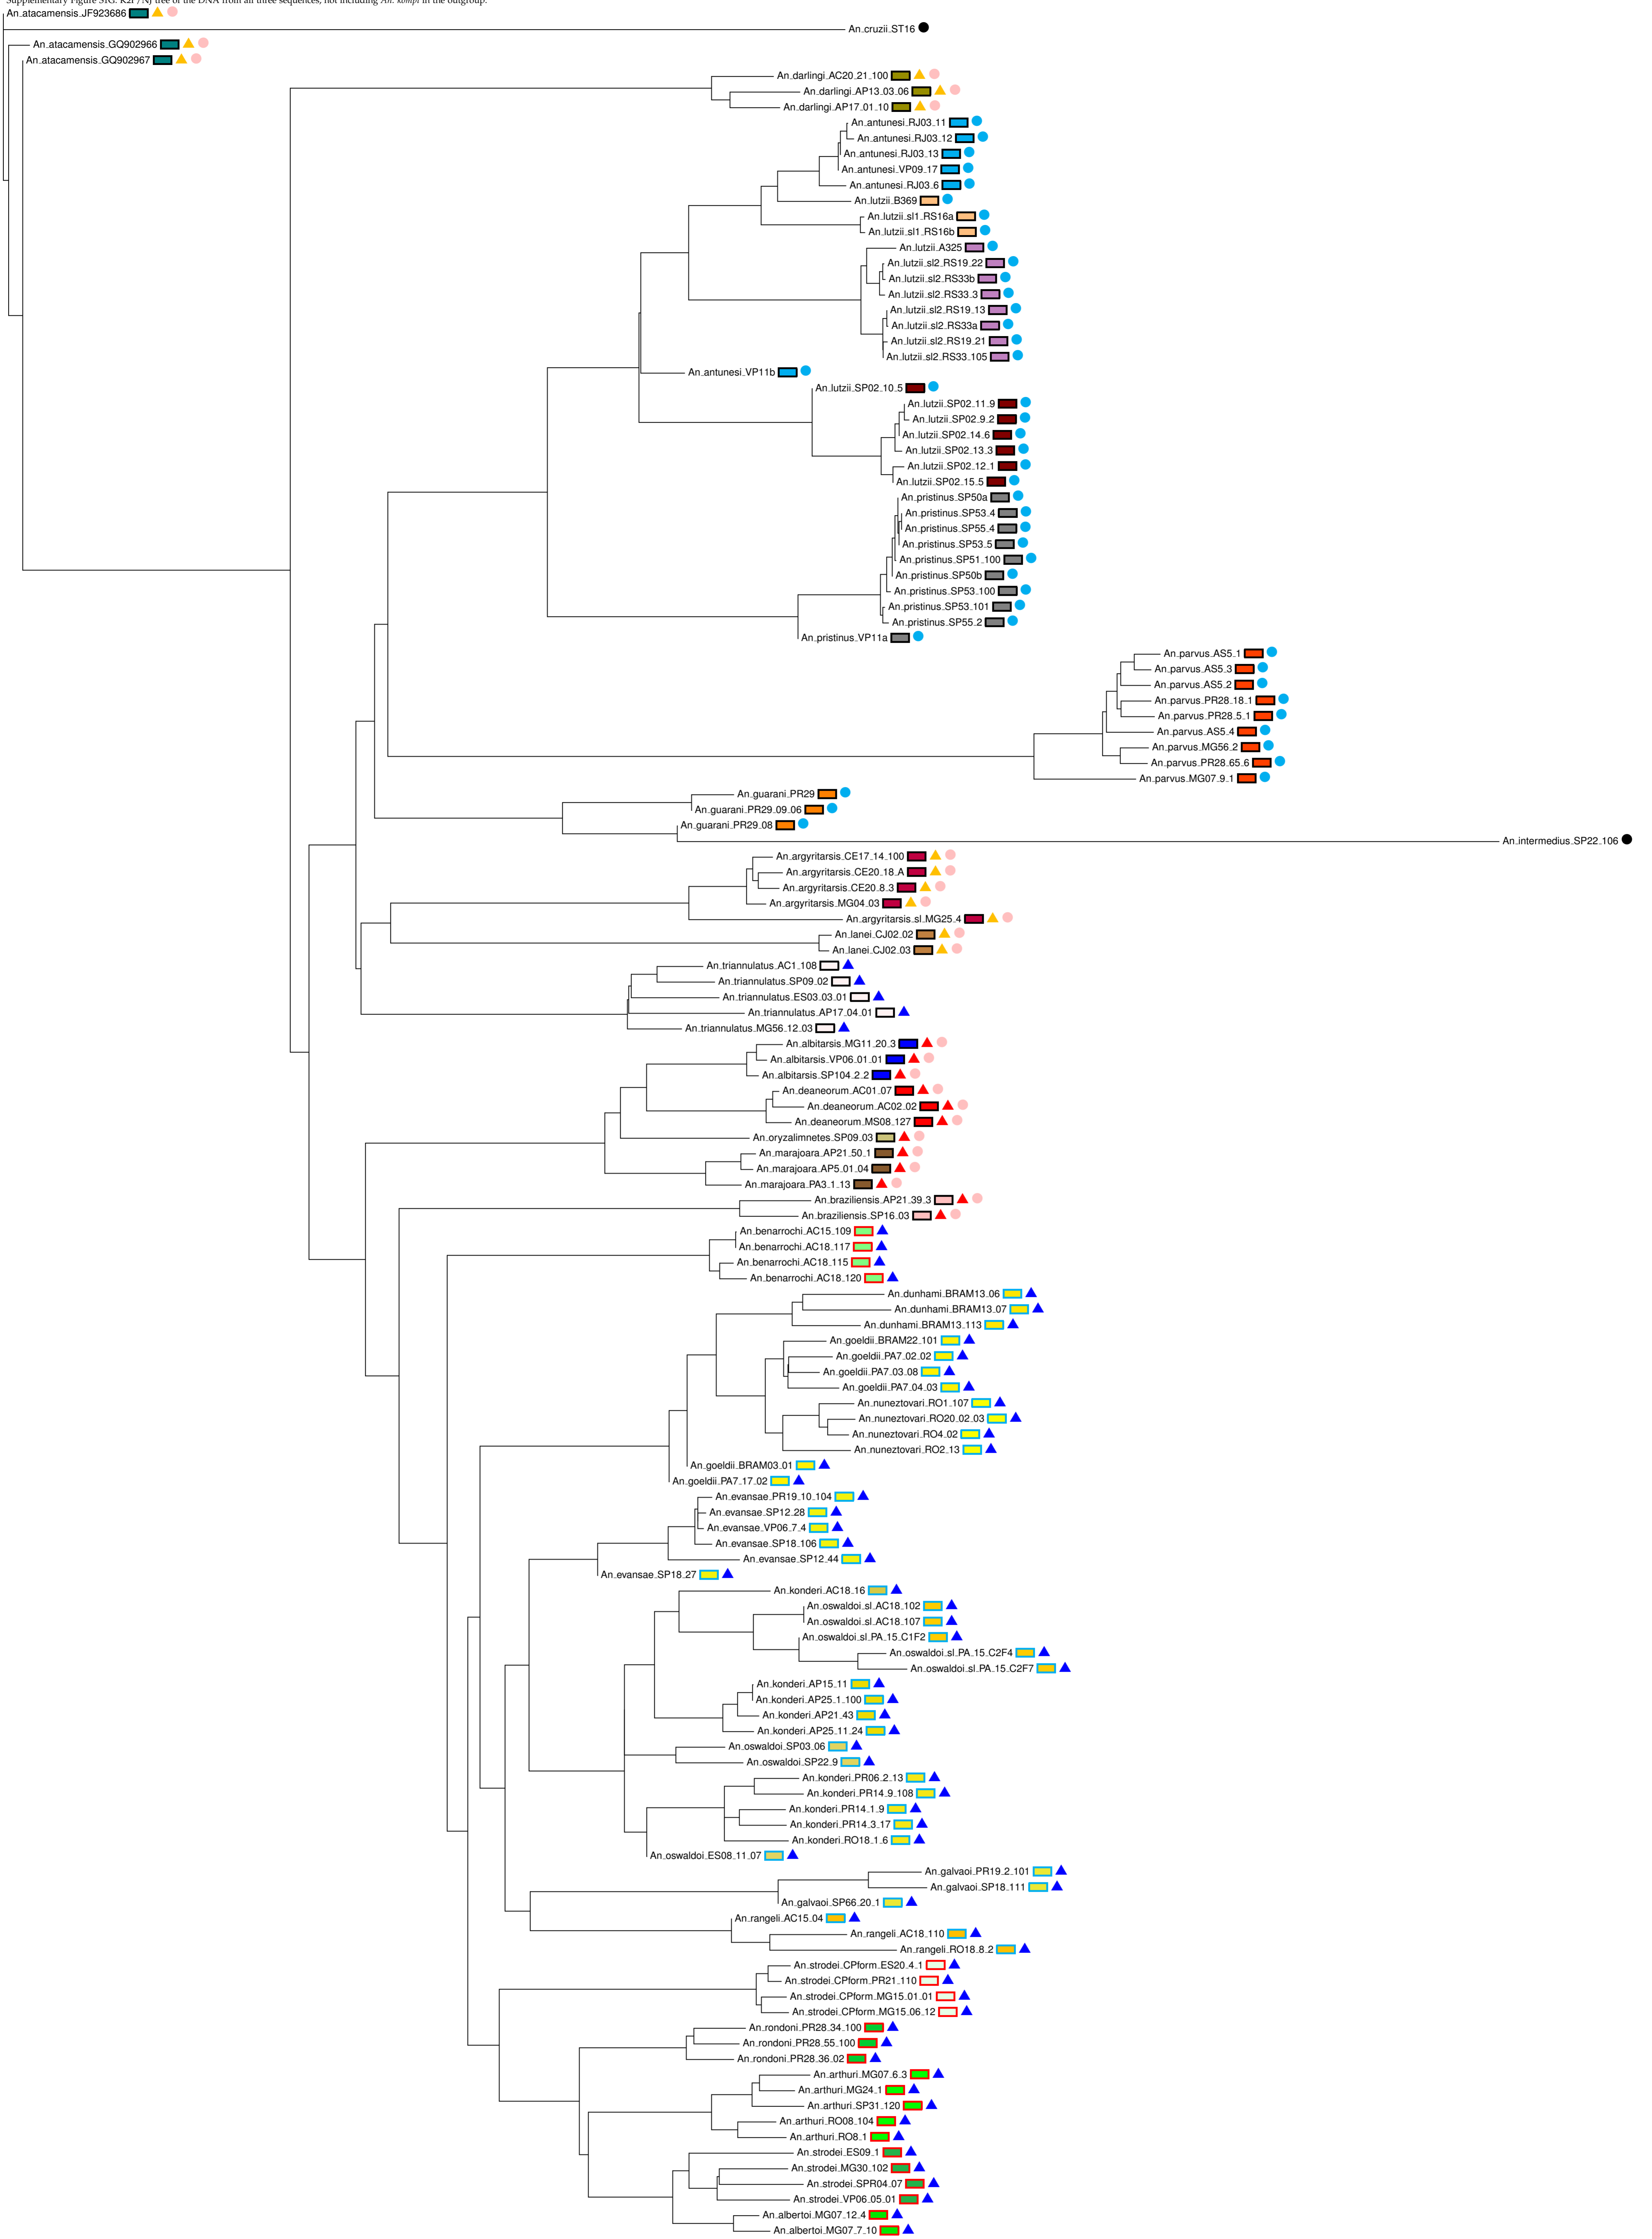

Supplement: pone.0054063.s001.pdf [file pone.0054063.s001.pdf]
