# Supplementary material for: Phylogenetic Analysis and DNA-based Species Confirmation in Anopheles (Nyssorhynchus)
Source: PubMed Central journal article supplement (PMC3563636; doi:10.1371/journal.pone.0054063), 2013-02-04
Supplement: pone.0054063.s003.pdf [file pone.0054063.s003.pdf]

## Supplementary Table S1. Species and specimens used in this study

### ALBIMANUS SECTION

#### OSWALDOI SERIES

##### Oswaldoi Group

##### Oswaldoi Subgroup

##### *An. rangeli*

3

An\_rangeli\_AC15\_04

An\_rangeli\_AC18\_110

An\_rangeli\_R018\_8\_2

##### *An. galvaoi*

3

An\_galvaoi\_PR19\_2\_101

An\_galvaoi\_SP18\_111

An\_galvaoi\_SP66\_20\_1

##### *An. konderi A*

4

An\_konderi\_AP15\_11

An\_konderi\_AP21\_43

An\_konderi\_AP25\_11\_24

An\_konderi\_AP25\_1\_100

##### *An. konderi s. s.*

5

An\_konderi\_PR06\_2\_13

An\_konderi\_PR14\_1\_9

An\_konderi\_PR14\_3\_17

An\_konderi\_PR14\_9\_108

An\_konderi\_R018\_1\_6

##### *An. konderi B*

1

An\_konderi\_AC18\_16

##### *An. oswaldoi A*

5

An\_oswaldoi\_sl\_AC18\_102

An\_oswaldoi\_sl\_AC18\_107

An\_oswaldoi\_sl\_PA\_15\_C1F2

An\_oswaldoi\_sl\_PA\_15\_C2F4

An\_oswaldoi\_sl\_PA\_15\_C2F7

##### *An. oswaldoi ss*

3

An\_oswaldoi\_ES08\_11\_07

An\_oswaldoi\_SP03\_06

An\_oswaldoi\_SP22\_9

##### *An. dunhami*

3

An\_dunhami\_BRAM13\_06

An\_dunhami\_BRAM13\_07

An\_dunhami\_BRAM13\_113

##### *An. evansae*

6

An\_evansae\_PR19\_10\_104

An\_evansae\_SP12\_28

An\_evansae\_SP12\_44

An\_evansae\_SP18\_106

An\_evansae\_SP18\_27

An\_evansae\_VP06\_7\_4

##### Nuneztovari Complex

##### *An. nuneztovari*

4

An\_nuneztovari\_R01\_107

An\_nuneztovari\_R020\_02\_03

An\_nuneztovari\_R02\_13

An\_nuneztovari\_R04\_02

##### *An. goeldii*

6

An\_goeldii\_BRAM03\_01

An\_goeldii\_BRAM22\_101

An\_goeldii\_PA7\_02\_02

An\_goeldii\_PA7\_03\_08

An\_goeldii\_PA7\_04\_03

An\_goeldii\_PA7\_17\_02

##### Strodei Subgroup

##### *An. strodei*

4

An\_strodei\_ES09\_1

An\_strodei\_MG30\_102

An\_strodei\_SPR04\_07

An\_strodei\_VP06\_05\_01

##### *An. albertoi*

2

An\_albertoi\_MG07\_12\_4

An\_albertoi\_MG07\_7\_10

##### *An. strodei* CPform

4

An\_strodei\_CPform\_ES20\_4\_1

An\_strodei\_CPform\_MG15\_01\_01

An\_strodei\_CPform\_MG15\_06\_12

An\_strodei\_CPform\_PR21\_110

##### *An. arthuri*

5

An\_arthuri\_MG07\_6\_3

An\_arthuri\_MG24\_1

An\_arthuri\_R008\_104

An\_arthuri\_R08\_1

An\_arthuri\_SP31\_120

##### *An. rondoni*

3

An\_rondoni\_PR28\_34\_100

An\_rondoni\_PR28\_36\_02

An\_rondoni\_PR28\_55\_100

##### Benarrochi Complex

##### *An. benarrochi*

4

An\_benarrochi\_AC15\_109

An\_benarrochi\_AC18\_115

An\_benarrochi\_AC18\_117

An\_benarrochi\_AC18\_120

##### Triannulatus Group

##### *An. triannulatus*

5

An\_triannulatus\_AC1\_108

An\_triannulatus\_AP17\_04\_01

An\_triannulatus\_ES03\_03\_01

An\_triannulatus\_MG56\_12\_03

An\_triannulatus\_SP09\_02

### ARGYRITARSIS SECTION

#### ALBITARSIS SERIES

##### Albitarsis Group

##### Albitarsis Complex

##### *An. oryzalimnetes*

1

An\_oryzalimnetes\_SP09\_03

##### *An. deaneorum*

3

An\_deaneorum\_AC01\_07

An\_deaneorum\_AC02\_02  
 An\_deaneorum\_MS08\_127  
*An. albitarsis*  
 3  
 An\_albitarsis\_MG11\_20\_3  
 An\_albitarsis\_SP104\_2\_2  
 An\_albitarsis\_VP06\_01\_01  
*An. marajoara*  
 3  
 An\_marajoara\_AP21\_50\_1  
 An\_marajoara\_AP5\_01\_04  
 An\_marajoara\_PA3\_1\_13  
 Braziliensis Group  
*An. braziliensis*  
 2  
 An\_braziliensis\_AP21\_39\_3  
 An\_braziliensis\_SP16\_03  
 ARGYRITARSIS SERIES  
 Argyritarsis Group  
*An. argyritarsis*  
 4  
 An\_argyritarsis\_CE17\_14\_100  
 An\_argyritarsis\_CE20\_18\_A  
 An\_argyritarsis\_CE20\_8\_3  
 An\_argyritarsis\_MG04\_03  
*An. argyritarsis s.l.*  
 1  
 An\_argyritarsis\_sl\_MG25\_4  
 Darlingi Group  
*An. darlingi*  
 3  
 An\_darlingi\_AC20\_21\_100  
 An\_darlingi\_AP13\_03\_06  
 An\_darlingi\_AP17\_01\_10  
 Lanei Group  
*An. lanei*  
 2  
 An\_lanei\_CJ02\_02  
 An\_lanei\_CJ02\_03  
 Pictipennis Group  
*An. atacamensis*  
 3  
 An\_atacamensis\_GQ902966  
 An\_atacamensis\_GQ902967  
 An\_atacamensis\_JF923686  
 MYZORHYNCHHELLA SECTION  
*An. guarani*  
 3  
 An\_guarani\_PR29  
 An\_guarani\_PR29\_08  
 An\_guarani\_PR29\_09\_06  
*An. parvus*  
 9  
 An\_parvus\_AS5\_1  
 An\_parvus\_AS5\_2  
 An\_parvus\_AS5\_3  
 An\_parvus\_AS5\_4  
 An\_parvus\_MG07\_9\_1  
 An\_parvus\_MG56\_2  
 An\_parvus\_PR28\_18\_1  
 An\_parvus\_PR28\_5\_1  
 An\_parvus\_PR28\_65\_6  
*An. antunesi*  
 6  
 An\_antunesi\_RJ03\_11  
 An\_antunesi\_RJ03\_12  
 An\_antunesi\_RJ03\_13  
 An\_antunesi\_RJ03\_6  
 An\_antunesi\_VP09\_17  
 An\_antunesi\_VP11b  
*An. lutzii ss*  
 7  
 An\_lutzii\_SP02\_10\_5  
 An\_lutzii\_SP02\_11\_9  
 An\_lutzii\_SP02\_12\_1  
 An\_lutzii\_SP02\_13\_3  
 An\_lutzii\_SP02\_14\_6  
 An\_lutzii\_SP02\_15\_5  
 An\_lutzii\_SP02\_9\_2  
*An. lutzii B*  
 3  
 An\_lutzii\_B369  
 An\_lutzii\_sl1\_RS16a  
 An\_lutzii\_sl1\_RS16b  
*An. lutzii A*  
 8  
 An\_lutzii\_A325  
 An\_lutzii\_sl2\_RS19\_13  
 An\_lutzii\_sl2\_RS19\_21  
 An\_lutzii\_sl2\_RS19\_22  
 An\_lutzii\_sl2\_RS33\_105  
 An\_lutzii\_sl2\_RS33\_3  
 An\_lutzii\_sl2\_RS33a  
 An\_lutzii\_sl2\_RS33b  
*An. pristinus*  
 10  
 An\_pristinus\_SP50a  
 An\_pristinus\_SP50b  
 An\_pristinus\_SP51\_100  
 An\_pristinus\_SP53\_100  
 An\_pristinus\_SP53\_101  
 An\_pristinus\_SP53\_4  
 An\_pristinus\_SP53\_5  
 An\_pristinus\_SP55\_2  
 An\_pristinus\_SP55\_4  
 An\_pristinus\_VP11a  
 OUTGROUP  
*An. kompi*  
 1  
 An\_kompi\_SP69\_22\_5  
*An. cruzii*  
 1  
 An\_cruzii\_ST16  
*An. intermedius*  
 1  
 An\_intermedius\_SP22\_106
