# Supplementary material for: Phylogenetic Analysis and DNA-based Species Confirmation in Anopheles (Nyssorhynchus)
Source: PubMed Central journal article supplement (PMC3563636; doi:10.1371/journal.pone.0054063), 2013-02-04
Supplement: pone.0054063.s004.pdf [file pone.0054063.s004.pdf]

Supplementary Table S2A. Support for higher-level groupings from analyses of DNA sequences

|                                                                   |      | <i>An konderi</i> A + <i>konderi</i> B + <i>oswaldoi</i> A | <i>An konderi</i> A + <i>konderi</i> B + <i>oswaldoi</i> A + <i>konderi</i> ss | <i>An konderi</i> A + <i>konderi</i> B + <i>oswaldoi</i> A + <i>konderi</i> ss + <i>oswaldoi</i> ss | <i>An konderi</i> A + <i>konderi</i> B + <i>oswaldoi</i> A + <i>konderi</i> ss + <i>oswaldoi</i> ss + <i>evansae</i> | <i>An galvanoi</i> + <i>rangeli</i> | <i>An konderi</i> A + <i>konderi</i> B + <i>oswaldoi</i> A + <i>konderi</i> ss + <i>oswaldoi</i> ss + <i>evansae</i> + <i>galvanoi</i> + <i>rangeli</i> | Nunestovari Complex ( <i>An nunestovari</i> + <i>goelitti</i> ) | Nunestovari Complex + <i>dunhami</i> | Oswaldoi Subgroup | <i>An albertoi</i> + <i>strodei</i> | <i>An albertoi</i> + <i>strodei</i> + <i>arthuri</i> | <i>An albertoi</i> + <i>strodei</i> + <i>arthuri</i> + <i>rondoni</i> | <i>An albertoi</i> + <i>strodei</i> + <i>arthuri</i> + <i>rondoni</i> + CPForm | <i>An albertoi</i> + <i>strodei</i> + <i>arthuri</i> + <i>rondoni</i> + CPForm + <i>benarrochi</i> | Strodei Subgroup | Oswaldoi Series | Oswaldoi Series no <i>An benarrochi</i> | Oswaldoi Group |
|-------------------------------------------------------------------|------|------------------------------------------------------------|--------------------------------------------------------------------------------|-----------------------------------------------------------------------------------------------------|----------------------------------------------------------------------------------------------------------------------|-------------------------------------|---------------------------------------------------------------------------------------------------------------------------------------------------------|-----------------------------------------------------------------|--------------------------------------|-------------------|-------------------------------------|------------------------------------------------------|-----------------------------------------------------------------------|--------------------------------------------------------------------------------|----------------------------------------------------------------------------------------------------|------------------|-----------------|-----------------------------------------|----------------|
| All 3 genes in 8 partitions, <i>An kompi</i> included             | mb 1 | 1.0                                                        | 0.996                                                                          | 1.0                                                                                                 | 0.652                                                                                                                | 1.0                                 | 0.580                                                                                                                                                   | 1.0                                                             | 1.0                                  | 0.892             | 1.0                                 | 0.764                                                | 1.0                                                                   | 1.0                                                                            | 0.052                                                                                              | 0.052            | 0.0             | 0.0                                     | 1.0            |
|                                                                   | mb 2 | 0.992                                                      | 1.0                                                                            | 1.0                                                                                                 | 0.648                                                                                                                | 1.0                                 | 0.612                                                                                                                                                   | 1.0                                                             | 1.0                                  | 0.876             | 1.0                                 | 0.864                                                | 1.0                                                                   | 0.996                                                                          | 0.060                                                                                              | 0.060            | 0.0             | 0.0                                     | 1.0            |
|                                                                   | p4 0 | 0.988                                                      | 0.966                                                                          | 0.012                                                                                               | 0.0                                                                                                                  | 1.0                                 | 0.0                                                                                                                                                     | 0.998                                                           | 1.0                                  | 0.0               | 1.0                                 | 0.632                                                | 1.0                                                                   | 1.0                                                                            | 0.042                                                                                              | 0.042            | 0.0             | 0.0                                     | 0.0            |
|                                                                   | p4 1 | 0.996                                                      | 1.0                                                                            | 1.0                                                                                                 | 0.632                                                                                                                | 1.0                                 | 0.622                                                                                                                                                   | 0.998                                                           | 1.0                                  | 0.892             | 1.0                                 | 0.600                                                | 1.0                                                                   | 0.998                                                                          | 0.078                                                                                              | 0.078            | 0.0             | 0.0                                     | 0.998          |
|                                                                   | p4 2 | 1.0                                                        | 0.996                                                                          | 1.0                                                                                                 | 0.632                                                                                                                | 1.0                                 | 0.602                                                                                                                                                   | 1.0                                                             | 1.0                                  | 0.908             | 1.0                                 | 0.654                                                | 1.0                                                                   | 1.0                                                                            | 0.060                                                                                              | 0.060            | 0.0             | 0.0                                     | 0.990          |
|                                                                   | p4 3 | 0.998                                                      | 1.0                                                                            | 1.0                                                                                                 | 0.702                                                                                                                | 1.0                                 | 0.588                                                                                                                                                   | 0.998                                                           | 1.0                                  | 0.940             | 1.0                                 | 0.578                                                | 1.0                                                                   | 1.0                                                                            | 0.072                                                                                              | 0.072            | 0.0             | 0.0                                     | 1.0            |
|                                                                   | p4 4 | 0.998                                                      | 1.0                                                                            | 1.0                                                                                                 | 0.614                                                                                                                | 1.0                                 | 0.626                                                                                                                                                   | 1.0                                                             | 1.0                                  | 0.898             | 1.0                                 | 0.868                                                | 1.0                                                                   | 1.0                                                                            | 0.062                                                                                              | 0.062            | 0.0             | 0.0                                     | 1.0            |
| All 3 genes in 8 partitions, <i>An kompi</i> excluded             | mb 1 | 0.920                                                      | 0.880                                                                          | 0.044                                                                                               | 0.0                                                                                                                  | 1.0                                 | 0.0                                                                                                                                                     | 0.996                                                           | 1.0                                  | 0.0               | 1.0                                 | 0.668                                                | 1.0                                                                   | 1.0                                                                            | 0.036                                                                                              | 0.036            | 0.0             | 0.0                                     | 0.0            |
|                                                                   | mb 2 | 0.928                                                      | 0.892                                                                          | 0.036                                                                                               | 0.0                                                                                                                  | 1.0                                 | 0.0                                                                                                                                                     | 0.996                                                           | 0.944                                | 0.0               | 1.0                                 | 0.584                                                | 1.0                                                                   | 1.0                                                                            | 0.028                                                                                              | 0.028            | 0.0             | 0.0                                     | 0.0            |
|                                                                   | p4 0 | 0.898                                                      | 0.810                                                                          | 0.038                                                                                               | 0.0                                                                                                                  | 1.0                                 | 0.002                                                                                                                                                   | 0.994                                                           | 1.0                                  | 0.0               | 1.0                                 | 0.422                                                | 1.0                                                                   | 1.0                                                                            | 0.036                                                                                              | 0.036            | 0.0             | 0.0                                     | 0.0            |
|                                                                   | p4 1 | 0.992                                                      | 0.998                                                                          | 1.0                                                                                                 | 0.562                                                                                                                | 1.0                                 | 0.628                                                                                                                                                   | 1.0                                                             | 1.0                                  | 0.900             | 1.0                                 | 0.702                                                | 1.0                                                                   | 0.998                                                                          | 0.066                                                                                              | 0.066            | 0.0             | 0.0                                     | 0.998          |
|                                                                   | p4 2 | 0.940                                                      | 0.846                                                                          | 0.044                                                                                               | 0.0                                                                                                                  | 1.0                                 | 0.0                                                                                                                                                     | 1.0                                                             | 1.0                                  | 0.0               | 1.0                                 | 0.602                                                | 1.0                                                                   | 0.998                                                                          | 0.032                                                                                              | 0.032            | 0.0             | 0.0                                     | 0.0            |
|                                                                   | p4 3 | 0.968                                                      | 0.956                                                                          | 0.738                                                                                               | 0.384                                                                                                                | 0.996                               | 0.544                                                                                                                                                   | 0.906                                                           | 1.0                                  | 0.594             | 1.0                                 | 0.488                                                | 1.0                                                                   | 0.996                                                                          | 0.058                                                                                              | 0.058            | 0.0             | 0.0                                     | 0.714          |
|                                                                   | p4 4 | 0.946                                                      | 0.892                                                                          | 0.030                                                                                               | 0.002                                                                                                                | 0.998                               | 0.0                                                                                                                                                     | 0.998                                                           | 1.0                                  | 0.0               | 1.0                                 | 0.730                                                | 1.0                                                                   | 0.998                                                                          | 0.042                                                                                              | 0.042            | 0.0             | 0.0                                     | 0.0            |
| <i>white</i> gene only, in 3 partitions, <i>An kompi</i> excluded | mb 1 | 0.004                                                      | 0.032                                                                          | 0.620                                                                                               | 0.124                                                                                                                | 0.472                               | 0.004                                                                                                                                                   | 0.064                                                           | 1.0                                  | 0.0               | 0.028                               | 0.0                                                  | 0.004                                                                 | 0.068                                                                          | 0.0                                                                                                | 0.0              | 0.072           | 0.0                                     | 0.048          |
|                                                                   | mb 2 | 0.004                                                      | 0.080                                                                          | 0.812                                                                                               | 0.108                                                                                                                | 0.328                               | 0.004                                                                                                                                                   | 0.068                                                           | 1.0                                  | 0.004             | 0.068                               | 0.0                                                  | 0.004                                                                 | 0.084                                                                          | 0.0                                                                                                | 0.0              | 0.024           | 0.0                                     | 0.036          |
|                                                                   | p4 0 | 0.010                                                      | 0.090                                                                          | 0.822                                                                                               | 0.076                                                                                                                | 0.282                               | 0.002                                                                                                                                                   | 0.080                                                           | 1.0                                  | 0.0               | 0.052                               | 0.0                                                  | 0.006                                                                 | 0.058                                                                          | 0.0                                                                                                | 0.0              | 0.018           | 0.0                                     | 0.036          |
|                                                                   | p4 1 | 0.0                                                        | 0.072                                                                          | 0.876                                                                                               | 0.080                                                                                                                | 0.196                               | 0.006                                                                                                                                                   | 0.058                                                           | 1.0                                  | 0.0               | 0.058                               | 0.0                                                  | 0.006                                                                 | 0.044                                                                          | 0.002                                                                                              | 0.002            | 0.010           | 0.0                                     | 0.014          |
|                                                                   | p4 2 | 0.008                                                      | 0.078                                                                          | 0.840                                                                                               | 0.098                                                                                                                | 0.262                               | 0.0                                                                                                                                                     | 0.046                                                           | 1.0                                  | 0.0               | 0.050                               | 0.0                                                  | 0.002                                                                 | 0.054                                                                          | 0.0                                                                                                | 0.0              | 0.048           | 0.0                                     | 0.006          |
|                                                                   | p4 3 | 0.0                                                        | 0.074                                                                          | 0.804                                                                                               | 0.094                                                                                                                | 0.422                               | 0.0                                                                                                                                                     | 0.080                                                           | 1.0                                  | 0.0               | 0.052                               | 0.0                                                  | 0.002                                                                 | 0.054                                                                          | 0.0                                                                                                | 0.0              | 0.096           | 0.0                                     | 0.012          |
|                                                                   | p4 4 | 0.014                                                      | 0.070                                                                          | 0.846                                                                                               | 0.052                                                                                                                | 0.040                               | 0.0                                                                                                                                                     | 0.110                                                           | 1.0                                  | 0.0               | 0.066                               | 0.0                                                  | 0.002                                                                 | 0.024                                                                          | 0.002                                                                                              | 0.002            | 0.0             | 0.0                                     | 0.0            |
| <i>CAD</i> gene only, in 3 partitions, <i>An kompi</i> excluded   | mb 1 | 0.008                                                      | 0.344                                                                          | 0.028                                                                                               | 0.0                                                                                                                  | 1.0                                 | 0.0                                                                                                                                                     | 0.0                                                             | 1.0                                  | 0.008             | 0.996                               | 0.996                                                | 1.0                                                                   | 0.080                                                                          | 0.0                                                                                                | 0.0              | 0.0             | 0.0                                     | 0.0            |
|                                                                   | mb 2 | 0.0                                                        | 0.328                                                                          | 0.060                                                                                               | 0.004                                                                                                                | 1.0                                 | 0.0                                                                                                                                                     | 0.516                                                           | 1.0                                  | 0.008             | 1.0                                 | 1.0                                                  | 1.0                                                                   | 0.040                                                                          | 0.0                                                                                                | 0.0              | 0.0             | 0.0                                     | 0.0            |
|                                                                   | p4 0 | 0.0                                                        | 0.664                                                                          | 0.086                                                                                               | 0.004                                                                                                                | 0.998                               | 0.004                                                                                                                                                   | 0.016                                                           | 1.0                                  | 0.050             | 0.994                               | 0.992                                                | 0.992                                                                 | 0.042                                                                          | 0.0                                                                                                | 0.0              | 0.0             | 0.0                                     | 0.0            |
|                                                                   | p4 1 | 0.002                                                      | 0.536                                                                          | 0.166                                                                                               | 0.012                                                                                                                | 0.996                               | 0.0                                                                                                                                                     | 1.0                                                             | 1.0                                  | 0.144             | 0.970                               | 0.974                                                | 0.972                                                                 | 0.034                                                                          | 0.0                                                                                                | 0.0              | 0.0             | 0.0                                     | 0.0            |
|                                                                   | p4 2 | 0.002                                                      | 0.506                                                                          | 0.062                                                                                               | 0.002                                                                                                                | 0.996                               | 0.0                                                                                                                                                     | 1.0                                                             | 1.0                                  | 0.018             | 1.0                                 | 1.0                                                  | 1.0                                                                   | 0.030                                                                          | 0.0                                                                                                | 0.0              | 0.0             | 0.0                                     | 0.0            |
|                                                                   | p4 3 | 0.0                                                        | 0.290                                                                          | 0.034                                                                                               | 0.0                                                                                                                  | 1.0                                 | 0.0                                                                                                                                                     | 0.0                                                             | 1.0                                  | 0.016             | 1.0                                 | 1.0                                                  | 0.998                                                                 | 0.032                                                                          | 0.0                                                                                                | 0.0              | 0.0             | 0.0                                     | 0.0            |
|                                                                   | p4 4 | 0.002                                                      | 0.220                                                                          | 0.006                                                                                               | 0.0                                                                                                                  | 1.0                                 | 0.0                                                                                                                                                     | 0.0                                                             | 1.0                                  | 0.0               | 1.0                                 | 1.0                                                  | 1.0                                                                   | 0.146                                                                          | 0.0                                                                                                | 0.0              | 0.0             | 0.0                                     | 0.0            |
| <i>COI</i> gene only, in 2 partitions, <i>An kompi</i> excluded   | mb 1 | 0.464                                                      | 0.0                                                                            | 0.0                                                                                                 | 0.036                                                                                                                | 0.100                               | 0.056                                                                                                                                                   | 1.0                                                             | 1.0                                  | 0.0               | 0.760                               | 0.0                                                  | 1.0                                                                   | 0.884                                                                          | 0.060                                                                                              | 0.060            | 0.0             | 0.0                                     | 0.776          |
|                                                                   | mb 2 | 0.488                                                      | 0.0                                                                            | 0.0                                                                                                 | 0.028                                                                                                                | 0.052                               | 0.044                                                                                                                                                   | 1.0                                                             | 1.0                                  | 0.0               | 0.768                               | 0.0                                                  | 1.0                                                                   | 0.992                                                                          | 0.088                                                                                              | 0.088            | 0.012           | 0.0                                     | 0.752          |
|                                                                   | p4 0 | 0.474                                                      | 0.0                                                                            | 0.0                                                                                                 | 0.026                                                                                                                | 0.092                               | 0.046                                                                                                                                                   | 0.994                                                           | 1.0                                  | 0.0               | 0.780                               | 0.0                                                  | 0.994                                                                 | 0.996                                                                          | 0.098                                                                                              | 0.098            | 0.002           | 0.0                                     | 0.756          |
|                                                                   | p4 1 | 0.478                                                      | 0.0                                                                            | 0.0                                                                                                 | 0.040                                                                                                                | 0.098                               | 0.054                                                                                                                                                   | 0.998                                                           | 1.0                                  | 0.0               | 0.814                               | 0.0                                                  | 1.0                                                                   | 0.996                                                                          | 0.088                                                                                              | 0.088            | 0.004           | 0.0                                     | 0.750          |
|                                                                   | p4 2 | 0.492                                                      | 0.0                                                                            | 0.0                                                                                                 | 0.046                                                                                                                | 0.096                               | 0.052                                                                                                                                                   | 0.994                                                           | 1.0                                  | 0.0               | 0.840                               | 0.0                                                  | 0.998                                                                 | 0.986                                                                          | 0.090                                                                                              | 0.090            | 0.016           | 0.0                                     | 0.728          |
|                                                                   | p4 3 | 0.472                                                      | 0.0                                                                            | 0.0                                                                                                 | 0.042                                                                                                                | 0.088                               | 0.050                                                                                                                                                   | 1.0                                                             | 0.994                                | 0.0               | 0.784                               | 0.0                                                  | 0.998                                                                 | 0.994                                                                          | 0.122                                                                                              | 0.122            | 0.002           | 0.0                                     | 0.660          |
|                                                                   | p4 4 | 0.410                                                      | 0.0                                                                            | 0.0                                                                                                 | 0.036                                                                                                                | 0.056                               | 0.062                                                                                                                                                   | 1.0                                                             | 0.994                                | 0.0               | 0.778                               | 0.0                                                  | 1.0                                                                   | 0.994                                                                          | 0.086                                                                                              | 0.086            | 0.004           | 0.0                                     | 0.758          |

Supplementary Table S2B. Support for higher-level groupings from analyses of DNA sequences

|                                                                    |      | Oswaldoi Group no <i>An benarrochi</i> | Oswaldoi Group with <i>An brazilensis</i> | Oswaldoi Group no <i>An benarrochi</i> with <i>An brazilensis</i> | <i>An triannulatus</i> + <i>darlingi</i> | <i>An triannulatus</i> + <i>rangeli</i> | <i>An triannulatus</i> + <i>argyritarsis</i> | <i>An triannulatus</i> + <i>lanei</i> | <i>An argyritarsis</i> + <i>darlingi</i> | <i>An argyritarsis</i> + <i>lanei</i> + <i>darlingi</i> | Argyritarsis Series | Argyritarsis Series + <i>An triannulatus</i> | Albitarsis Group/Complex | Albitarsis Series | Argyritarsis Section | Argyritarsis Section + <i>An triannulatus</i> | <i>An antunesi</i> + <i>Iutzii</i> B | <i>An Iutzii</i> ss + <i>Iutzii</i> A | Myzorhynchella Crown (no <i>An parvus</i> ) | Myzorhynchella Section | outgroup |
|--------------------------------------------------------------------|------|----------------------------------------|-------------------------------------------|-------------------------------------------------------------------|------------------------------------------|-----------------------------------------|----------------------------------------------|---------------------------------------|------------------------------------------|---------------------------------------------------------|---------------------|----------------------------------------------|--------------------------|-------------------|----------------------|-----------------------------------------------|--------------------------------------|---------------------------------------|---------------------------------------------|------------------------|----------|
| All 3 genes in 8 partitions, <i>An kompi</i> included              | mb 1 | 0.856                                  | 0.620                                     | 0.856                                                             | 0.980                                    | 0.0                                     | 0.0                                          | 0.0                                   | 0.008                                    | 0.0                                                     | 0.0                 | 0.0                                          | 1.0                      | 0.004             | 0.0                  | 0.0                                           | 1.0                                  | 0.944                                 | 1.0                                         | 0.520                  | 0.0      |
|                                                                    | mb 2 | 0.860                                  | 0.684                                     | 0.860                                                             | 0.972                                    | 0.0                                     | 0.0                                          | 0.0                                   | 0.0                                      | 0.0                                                     | 0.0                 | 0.0                                          | 1.0                      | 0.0               | 0.0                  | 0.0                                           | 1.0                                  | 0.940                                 | 1.0                                         | 0.556                  | 0.0      |
|                                                                    | p4 0 | 0.0                                    | 0.0                                       | 0.0                                                               | 0.986                                    | 0.0                                     | 0.0                                          | 0.0                                   | 0.0                                      | 0.0                                                     | 0.0                 | 0.0                                          | 1.0                      | 0.0               | 0.0                  | 0.0                                           | 1.0                                  | 0.958                                 | 0.962                                       | 0.656                  | 0.0      |
|                                                                    | p4 1 | 0.836                                  | 0.732                                     | 0.836                                                             | 0.982                                    | 0.0                                     | 0.0                                          | 0.0                                   | 0.0                                      | 0.0                                                     | 0.0                 | 0.0                                          | 1.0                      | 0.002             | 0.0                  | 0.0                                           | 1.0                                  | 0.960                                 | 1.0                                         | 0.696                  | 0.0      |
|                                                                    | p4 2 | 0.862                                  | 0.642                                     | 0.862                                                             | 0.974                                    | 0.0                                     | 0.0                                          | 0.0                                   | 0.0                                      | 0.0                                                     | 0.0                 | 0.0                                          | 1.0                      | 0.004             | 0.0                  | 0.0                                           | 1.0                                  | 0.948                                 | 1.0                                         | 0.714                  | 0.0      |
|                                                                    | p4 3 | 0.838                                  | 0.678                                     | 0.838                                                             | 0.988                                    | 0.0                                     | 0.0                                          | 0.0                                   | 0.0                                      | 0.0                                                     | 0.0                 | 0.0                                          | 1.0                      | 0.0               | 0.0                  | 0.0                                           | 1.0                                  | 0.940                                 | 1.0                                         | 0.676                  | 0.0      |
|                                                                    | p4 4 | 0.848                                  | 0.692                                     | 0.848                                                             | 0.974                                    | 0.0                                     | 0.0                                          | 0.0                                   | 0.0                                      | 0.0                                                     | 0.0                 | 0.0                                          | 1.0                      | 0.0               | 0.0                  | 0.0                                           | 1.0                                  | 0.946                                 | 1.0                                         | 0.702                  | 0.0      |
| All 3 genes in 8 partitions, <i>An kompi</i> excluded              | mb 1 | 0.0                                    | 0.0                                       | 0.0                                                               | 0.952                                    | 0.0                                     | 0.0                                          | 0.0                                   | 0.0                                      | 0.0                                                     | 0.0                 | 0.0                                          | 1.0                      | 0.004             | 0.0                  | 0.0                                           | 1.0                                  | 0.964                                 | 1.0                                         | 1.0                    | 0.820    |
|                                                                    | mb 2 | 0.0                                    | 0.0                                       | 0.0                                                               | 0.956                                    | 0.0                                     | 0.0                                          | 0.0                                   | 0.0                                      | 0.0                                                     | 0.0                 | 0.0                                          | 1.0                      | 0.004             | 0.0                  | 0.0                                           | 1.0                                  | 0.952                                 | 0.720                                       | 0.704                  | 1.0      |
|                                                                    | p4 0 | 0.0                                    | 0.0                                       | 0.0                                                               | 0.960                                    | 0.0                                     | 0.0                                          | 0.0                                   | 0.0                                      | 0.0                                                     | 0.0                 | 0.0                                          | 1.0                      | 0.004             | 0.0                  | 0.0                                           | 1.0                                  | 0.976                                 | 1.0                                         | 0.996                  | 0.644    |
|                                                                    | p4 1 | 0.854                                  | 0.608                                     | 0.854                                                             | 0.948                                    | 0.0                                     | 0.0                                          | 0.0                                   | 0.0                                      | 0.0                                                     | 0.0                 | 0.0                                          | 1.0                      | 0.0               | 0.0                  | 0.0                                           | 1.0                                  | 0.964                                 | 1.0                                         | 0.996                  | 0.968    |
|                                                                    | p4 2 | 0.0                                    | 0.0                                       | 0.0                                                               | 0.970                                    | 0.0                                     | 0.0                                          | 0.0                                   | 0.0                                      | 0.0                                                     | 0.0                 | 0.0                                          | 1.0                      | 0.010             | 0.0                  | 0.0                                           | 1.0                                  | 0.958                                 | 0.870                                       | 0.862                  | 1.0      |
|                                                                    | p4 3 | 0.592                                  | 0.404                                     | 0.592                                                             | 0.956                                    | 0.0                                     | 0.0                                          | 0.0                                   | 0.0                                      | 0.0                                                     | 0.0                 | 0.0                                          | 1.0                      | 0.002             | 0.0                  | 0.0                                           | 1.0                                  | 0.962                                 | 0.944                                       | 0.936                  | 0.978    |
|                                                                    | p4 4 | 0.0                                    | 0.0                                       | 0.0                                                               | 0.990                                    | 0.0                                     | 0.0                                          | 0.0                                   | 0.0                                      | 0.0                                                     | 0.0                 | 0.0                                          | 0.996                    | 0.0               | 0.0                  | 0.0                                           | 1.0                                  | 0.962                                 | 0.806                                       | 0.788                  | 1.0      |
| <i>wilite</i> gene only, in 3 partitions, <i>An kompi</i> excluded | mb 1 | 0.0                                    | 0.0                                       | 0.0                                                               | 0.144                                    | 0.004                                   | 0.012                                        | 0.0                                   | 0.008                                    | 0.0                                                     | 0.0                 | 0.0                                          | 0.012                    | 0.0               | 0.0                  | 0.0                                           | 0.988                                | 1.0                                   | 1.0                                         | 0.096                  | 1.0      |
|                                                                    | mb 2 | 0.0                                    | 0.004                                     | 0.0                                                               | 0.244                                    | 0.004                                   | 0.0                                          | 0.0                                   | 0.016                                    | 0.0                                                     | 0.0                 | 0.0                                          | 0.008                    | 0.0               | 0.0                  | 0.0                                           | 0.984                                | 1.0                                   | 1.0                                         | 0.088                  | 1.0      |
|                                                                    | p4 0 | 0.0                                    | 0.0                                       | 0.0                                                               | 0.170                                    | 0.008                                   | 0.034                                        | 0.0                                   | 0.044                                    | 0.0                                                     | 0.0                 | 0.0                                          | 0.006                    | 0.0               | 0.0                  | 0.0                                           | 0.990                                | 1.0                                   | 1.0                                         | 0.088                  | 1.0      |
|                                                                    | p4 1 | 0.0                                    | 0.0                                       | 0.0                                                               | 0.276                                    | 0.008                                   | 0.004                                        | 0.0                                   | 0.018                                    | 0.0                                                     | 0.0                 | 0.0                                          | 0.004                    | 0.0               | 0.0                  | 0.0                                           | 0.994                                | 1.0                                   | 1.0                                         | 0.080                  | 1.0      |
|                                                                    | p4 2 | 0.0                                    | 0.0                                       | 0.0                                                               | 0.224                                    | 0.010                                   | 0.004                                        | 0.0                                   | 0.046                                    | 0.0                                                     | 0.0                 | 0.0                                          | 0.010                    | 0.0               | 0.0                  | 0.0                                           | 0.996                                | 1.0                                   | 1.0                                         | 0.074                  | 1.0      |
|                                                                    | p4 3 | 0.0                                    | 0.0                                       | 0.0                                                               | 0.230                                    | 0.014                                   | 0.010                                        | 0.0                                   | 0.014                                    | 0.0                                                     | 0.0                 | 0.0                                          | 0.012                    | 0.0               | 0.0                  | 0.0                                           | 0.994                                | 1.0                                   | 1.0                                         | 0.102                  | 1.0      |
|                                                                    | p4 4 | 0.0                                    | 0.0                                       | 0.0                                                               | 0.330                                    | 0.0                                     | 0.002                                        | 0.0                                   | 0.014                                    | 0.0                                                     | 0.0                 | 0.0                                          | 0.008                    | 0.0               | 0.0                  | 0.0                                           | 0.996                                | 1.0                                   | 1.0                                         | 0.122                  | 1.0      |
| CAD gene only, in 3 partitions, <i>An kompi</i> excluded           | mb 1 | 0.004                                  | 0.0                                       | 0.004                                                             | 0.004                                    | 0.0                                     | 0.296                                        | 0.0                                   | 0.0                                      | 0.0                                                     | 0.0                 | 0.0                                          | 1.0                      | 0.064             | 0.0                  | 0.0                                           | 1.0                                  | 0.312                                 | 1.0                                         | 0.024                  | 1.0      |
|                                                                    | mb 2 | 0.0                                    | 0.0                                       | 0.0                                                               | 0.024                                    | 0.0                                     | 0.276                                        | 0.0                                   | 0.004                                    | 0.0                                                     | 0.0                 | 0.0                                          | 1.0                      | 0.092             | 0.0                  | 0.0                                           | 1.0                                  | 0.360                                 | 1.0                                         | 0.060                  | 1.0      |
|                                                                    | p4 0 | 0.0                                    | 0.0                                       | 0.0                                                               | 0.0                                      | 0.0                                     | 0.042                                        | 0.004                                 | 0.0                                      | 0.0                                                     | 0.0                 | 0.0                                          | 1.0                      | 0.054             | 0.0                  | 0.0                                           | 1.0                                  | 0.438                                 | 1.0                                         | 0.0                    | 0.0      |
|                                                                    | p4 1 | 0.032                                  | 0.008                                     | 0.032                                                             | 0.0                                      | 0.0                                     | 0.324                                        | 0.0                                   | 0.0                                      | 0.0                                                     | 0.0                 | 0.0                                          | 1.0                      | 0.106             | 0.0                  | 0.0                                           | 1.0                                  | 0.386                                 | 1.0                                         | 0.0                    | 1.0      |
|                                                                    | p4 2 | 0.002                                  | 0.0                                       | 0.002                                                             | 0.0                                      | 0.0                                     | 0.122                                        | 0.0                                   | 0.0                                      | 0.0                                                     | 0.0                 | 0.0                                          | 1.0                      | 0.130             | 0.0                  | 0.0                                           | 1.0                                  | 0.384                                 | 1.0                                         | 0.0                    | 0.0      |
|                                                                    | p4 3 | 0.006                                  | 0.0                                       | 0.006                                                             | 0.0                                      | 0.0                                     | 0.304                                        | 0.0                                   | 0.0                                      | 0.0                                                     | 0.0                 | 0.0                                          | 1.0                      | 0.080             | 0.0                  | 0.0                                           | 1.0                                  | 0.360                                 | 1.0                                         | 0.0                    | 1.0      |
|                                                                    | p4 4 | 0.0                                    | 0.0                                       | 0.0                                                               | 0.446                                    | 0.0                                     | 0.048                                        | 0.0                                   | 0.004                                    | 0.0                                                     | 0.0                 | 0.0                                          | 1.0                      | 0.010             | 0.0                  | 0.0                                           | 1.0                                  | 0.260                                 | 1.0                                         | 0.828                  | 0.0      |
| COI gene only, in 2 partitions, <i>An kompi</i> excluded           | mb 1 | 0.0                                    | 0.0                                       | 0.0                                                               | 0.064                                    | 0.0                                     | 0.012                                        | 0.004                                 | 0.016                                    | 0.576                                                   | 0.0                 | 0.0                                          | 0.936                    | 0.0               | 0.0                  | 0.0                                           | 0.484                                | 0.004                                 | 0.0                                         | 0.0                    | 0.0      |
|                                                                    | mb 2 | 0.0                                    | 0.0                                       | 0.0                                                               | 0.012                                    | 0.0                                     | 0.0                                          | 0.004                                 | 0.008                                    | 0.324                                                   | 0.0                 | 0.0                                          | 0.952                    | 0.0               | 0.0                  | 0.0                                           | 0.500                                | 0.0                                   | 0.0                                         | 0.0                    | 0.0      |
|                                                                    | p4 0 | 0.0                                    | 0.002                                     | 0.0                                                               | 0.038                                    | 0.002                                   | 0.004                                        | 0.004                                 | 0.008                                    | 0.298                                                   | 0.0                 | 0.010                                        | 0.962                    | 0.0               | 0.0                  | 0.0                                           | 0.556                                | 0.0                                   | 0.012                                       | 0.0                    | 0.012    |
|                                                                    | p4 1 | 0.002                                  | 0.002                                     | 0.002                                                             | 0.008                                    | 0.0                                     | 0.004                                        | 0.002                                 | 0.046                                    | 0.642                                                   | 0.0                 | 0.0                                          | 0.964                    | 0.0               | 0.0                  | 0.0                                           | 0.584                                | 0.0                                   | 0.0                                         | 0.0                    | 0.004    |
|                                                                    | p4 2 | 0.0                                    | 0.0                                       | 0.0                                                               | 0.004                                    | 0.0                                     | 0.002                                        | 0.0                                   | 0.028                                    | 0.626                                                   | 0.0                 | 0.0                                          | 0.920                    | 0.002             | 0.0                  | 0.0                                           | 0.614                                | 0.0                                   | 0.0                                         | 0.0                    | 0.0      |
|                                                                    | p4 3 | 0.0                                    | 0.0                                       | 0.0                                                               | 0.004                                    | 0.0                                     | 0.002                                        | 0.004                                 | 0.020                                    | 0.426                                                   | 0.0                 | 0.0                                          | 0.954                    | 0.004             | 0.0                  | 0.0                                           | 0.514                                | 0.0                                   | 0.0                                         | 0.0                    | 0.008    |
|                                                                    | p4 4 | 0.002                                  | 0.002                                     | 0.002                                                             | 0.010                                    | 0.0                                     | 0.006                                        | 0.0                                   | 0.022                                    | 0.560                                                   | 0.0                 | 0.0                                          | 0.902                    | 0.002             | 0.0                  | 0.0                                           | 0.568                                | 0.004                                 | 0.0                                         | 0.0                    | 0.0      |
