# Supplementary material for: Phylogenetic Analysis and DNA-based Species Confirmation in Anopheles (Nyssorhynchus)
Source: PubMed Central journal article supplement (PMC3563636; doi:10.1371/journal.pone.0054063), 2013-02-04
Supplement: pone.0054063.s005.pdf [file pone.0054063.s005.pdf]

Supplementary Table S3A. Support for species and higher-order groupings from gene translations

|                             |       | <i>An albitarsis</i> | <i>An antunesi</i> | <i>An argyritarsis</i> | <i>An arthuri</i> | <i>An benarrochi</i> | <i>An brazilensis</i> | <i>An deancorum</i> | <i>An dunhami</i> | <i>An evansae</i> | <i>An galcaoi</i> | <i>An goeldii</i> | <i>An konderi A and ss An ostaaldoi A</i> | <i>An lutzii B</i> | <i>An lutzii A</i> | <i>An lutzii ss</i> | <i>An marajoara</i> | <i>An nuneztocari</i> | <i>An ostaaldoi ss</i> | <i>An parvus</i> | <i>An pristinus</i> | <i>An rangeli</i> | <i>An rondoni</i> | <i>An strodei</i> | <i>An strodei CPform</i> | <i>An triannulatus</i> |
|-----------------------------|-------|----------------------|--------------------|------------------------|-------------------|----------------------|-----------------------|---------------------|-------------------|-------------------|-------------------|-------------------|-------------------------------------------|--------------------|--------------------|---------------------|---------------------|-----------------------|------------------------|------------------|---------------------|-------------------|-------------------|-------------------|--------------------------|------------------------|
| <i>An kompi</i><br>included | mb 1  | 0.264                | 1.0                | 0.942                  | 0.976             | 0.976                | 0.998                 | 1.0                 | 0.042             | 1.0               | 0.452             | 0.0               | 0.0                                       | 0.346              | 1.0                | 0.978               | 1.0                 | 0.036                 | 0.958                  | 0.996            | 0.242               | 0.990             | 0.294             | 0.018             | 0.980                    | 0.996                  |
|                             | mb 2  | 0.276                | 0.998              | 0.954                  | 0.982             | 0.958                | 1.0                   | 1.0                 | 0.034             | 1.0               | 0.524             | 0.0               | 0.0                                       | 0.328              | 0.996              | 0.978               | 1.0                 | 0.034                 | 0.974                  | 0.992            | 0.280               | 0.994             | 0.310             | 0.018             | 0.992                    | 0.998                  |
|                             | p4 0  | 0.284                | 1.0                | 0.988                  | 0.982             | 0.932                | 0.998                 | 0.996               | 0.050             | 0.996             | 0.610             | 0.0               | 0.0                                       | 0.502              | 1.0                | 0.968               | 0.990               | 0.026                 | 0.964                  | 1.0              | 0.264               | 0.988             | 0.302             | 0.048             | 0.994                    | 0.996                  |
|                             | p4 1  | 0.400                | 1.0                | 1.0                    | 0.978             | 0.960                | 1.0                   | 0.998               | 0.032             | 1.0               | 0.536             | 0.0               | 0.0                                       | 0.518              | 1.0                | 0.950               | 1.0                 | 0.024                 | 0.974                  | 1.0              | 0.338               | 0.994             | 0.292             | 0.044             | 0.974                    | 1.0                    |
|                             | p4 2  | 0.376                | 0.998              | 1.0                    | 0.986             | 0.964                | 1.0                   | 0.998               | 0.038             | 1.0               | 0.564             | 0.0               | 0.0                                       | 0.482              | 1.0                | 0.956               | 0.998               | 0.038                 | 0.974                  | 1.0              | 0.276               | 0.998             | 0.266             | 0.052             | 0.996                    | 1.0                    |
|                             | p4 3  | 0.260                | 1.0                | 0.952                  | 0.984             | 0.976                | 0.998                 | 1.0                 | 0.024             | 0.998             | 0.564             | 0.0               | 0.0                                       | 0.490              | 1.0                | 0.970               | 1.0                 | 0.028                 | 0.976                  | 0.978            | 0.278               | 0.988             | 0.284             | 0.042             | 0.962                    | 0.996                  |
|                             | p4 4  | 0.272                | 1.0                | 0.984                  | 0.978             | 0.958                | 0.998                 | 0.998               | 0.032             | 1.0               | 0.536             | 0.0               | 0.0                                       | 0.464              | 0.998              | 0.950               | 1.0                 | 0.038                 | 0.968                  | 1.0              | 0.292               | 0.988             | 0.270             | 0.030             | 0.992                    | 1.0                    |
|                             | p4 5  | 0.316                | 0.996              | 0.984                  | 0.996             | 0.948                | 0.996                 | 0.994               | 0.048             | 0.998             | 0.550             | 0.0               | 0.0                                       | 0.482              | 1.0                | 0.974               | 0.986               | 0.040                 | 0.958                  | 0.992            | 0.304               | 0.994             | 0.264             | 0.038             | 0.996                    | 0.978                  |
|                             | p4 6  | 0.436                | 1.0                | 0.966                  | 0.990             | 0.946                | 0.994                 | 0.996               | 0.036             | 0.998             | 0.532             | 0.0               | 0.0                                       | 0.490              | 0.998              | 0.970               | 1.0                 | 0.034                 | 0.974                  | 0.990            | 0.260               | 0.992             | 0.252             | 0.034             | 0.984                    | 0.992                  |
|                             | p4 7  | 0.346                | 1.0                | 1.0                    | 0.982             | 0.948                | 0.996                 | 0.998               | 0.044             | 0.994             | 0.522             | 0.0               | 0.0                                       | 0.486              | 0.998              | 0.964               | 1.0                 | 0.042                 | 0.978                  | 0.988            | 0.300               | 0.990             | 0.302             | 0.042             | 0.964                    | 1.0                    |
| p4 8                        | 0.314 | 1.0                  | 0.942              | 0.986                  | 0.966             | 0.996                | 1.0                   | 0.024               | 0.998             | 0.554             | 0.0               | 0.0               | 0.490                                     | 1.0                | 0.970              | 1.0                 | 0.050               | 0.984                 | 0.992                  | 0.302            | 0.984               | 0.298             | 0.042             | 0.974             | 0.986                    |                        |
| p4 9                        | 0.340 | 1.0                  | 1.0                | 0.982                  | 0.960             | 1.0                  | 0.998                 | 0.030               | 1.0               | 0.544             | 0.0               | 0.0               | 0.496                                     | 0.998              | 0.968              | 1.0                 | 0.050               | 0.968                 | 0.996                  | 0.332            | 0.988               | 0.276             | 0.042             | 0.980             | 1.0                      |                        |
| <i>An kompi</i><br>excluded | mb 1  | 0.236                | 1.0                | 1.0                    | 0.984             | 0.940                | 1.0                   | 1.0                 | 0.044             | 1.0               | 0.584             | 0.0               | 0.0                                       | 0.336              | 0.996              | 0.964               | 1.0                 | 0.064                 | 0.976                  | 1.0              | 0.292               | 0.988             | 0.308             | 0.016             | 0.932                    | 0.996                  |
|                             | mb 2  | 0.236                | 1.0                | 1.0                    | 0.968             | 0.968                | 1.0                   | 1.0                 | 0.020             | 1.0               | 0.508             | 0.0               | 0.0                                       | 0.352              | 1.0                | 0.972               | 1.0                 | 0.036                 | 0.960                  | 1.0              | 0.212               | 1.0               | 0.296             | 0.032             | 0.844                    | 1.0                    |
|                             | p4 0  | 0.416                | 1.0                | 1.0                    | 0.983             | 0.844                | 0.998                 | 0.995               | 0.022             | 1.0               | 0.201             | 0.0               | 0.0                                       | 0.088              | 1.0                | 0.865               | 1.0                 | 0.013                 | 0.867                  | 1.0              | 0.132               | 0.949             | 0.091             | 0.010             | 0.861                    | 1.0                    |
|                             | p4 1  | 0.086                | 1.0                | 1.0                    | 0.998             | 0.849                | 0.998                 | 0.999               | 0.021             | 1.0               | 0.235             | 0.0               | 0.0                                       | 0.110              | 0.999              | 0.859               | 1.0                 | 0.021                 | 0.899                  | 1.0              | 0.146               | 0.980             | 0.120             | 0.014             | 0.964                    | 1.0                    |
|                             | p4 2  | 0.206                | 0.998              | 1.0                    | 0.983             | 0.826                | 0.999                 | 0.988               | 0.012             | 1.0               | 0.281             | 0.0               | 0.0                                       | 0.102              | 0.996              | 0.892               | 1.0                 | 0.010                 | 0.934                  | 1.0              | 0.119               | 0.979             | 0.123             | 0.010             | 0.900                    | 1.0                    |
|                             | p4 3  | 0.173                | 1.0                | 1.0                    | 0.976             | 0.849                | 0.997                 | 1.0                 | 0.011             | 1.0               | 0.194             | 0.0               | 0.0                                       | 0.089              | 0.996              | 0.889               | 1.0                 | 0.018                 | 0.845                  | 1.0              | 0.101               | 0.963             | 0.097             | 0.008             | 0.619                    | 0.996                  |
| p4 4                        | 0.108 | 1.0                  | 1.0                | 0.985                  | 0.881             | 0.997                | 0.996                 | 0.012               | 1.0               | 0.225             | 0.0               | 0.0               | 0.106                                     | 0.999              | 0.855              | 1.0                 | 0.030               | 0.937                 | 1.0                    | 0.118            | 0.966               | 0.103             | 0.011             | 0.967             | 1.0                      |                        |
| No outgroup                 | mb 1  | 0.288                | 1.0                | 1.0                    | 0.966             | 0.970                | 1.0                   | 1.0                 | 0.050             | 1.0               | 0.618             | 0.0               | 0.0                                       | 0.316              | 0.998              | 0.966               | 1.0                 | 0.034                 | 0.982                  | 1.0              | 0.230               | 0.996             | 0.300             | 0.020             | 1.0                      | 1.0                    |
|                             | mb 2  | 0.408                | 1.0                | 1.0                    | 0.964             | 0.976                | 1.0                   | 1.0                 | 0.034             | 1.0               | 0.546             | 0.0               | 0.0                                       | 0.330              | 0.998              | 0.978               | 1.0                 | 0.036                 | 0.984                  | 1.0              | 0.272               | 0.998             | 0.308             | 0.016             | 0.998                    | 1.0                    |
|                             | p4 0  | 0.151                | 1.0                | 1.0                    | 0.953             | 0.889                | 0.998                 | 1.0                 | 0.020             | 1.0               | 0.265             | 0.0               | 0.0                                       | 0.119              | 0.992              | 0.862               | 1.0                 | 0.019                 | 0.962                  | 1.0              | 0.124               | 0.974             | 0.083             | 0.022             | 0.975                    | 1.0                    |
|                             | p4 1  | 0.236                | 1.0                | 1.0                    | 0.986             | 0.867                | 1.0                   | 0.999               | 0.021             | 1.0               | 0.297             | 0.0               | 0.0                                       | 0.119              | 0.995              | 0.835               | 1.0                 | 0.015                 | 0.961                  | 1.0              | 0.150               | 0.980             | 0.133             | 0.019             | 0.988                    | 1.0                    |
|                             | p4 2  | 0.305                | 1.0                | 1.0                    | 0.990             | 0.901                | 1.0                   | 1.0                 | 0.017             | 1.0               | 0.243             | 0.0               | 0.0                                       | 0.109              | 0.995              | 0.850               | 1.0                 | 0.016                 | 0.978                  | 1.0              | 0.146               | 0.961             | 0.111             | 0.017             | 0.988                    | 1.0                    |
|                             | p4 3  | 0.212                | 1.0                | 1.0                    | 0.989             | 0.900                | 0.999                 | 1.0                 | 0.015             | 1.0               | 0.271             | 0.0               | 0.0                                       | 0.106              | 1.0                | 0.846               | 1.0                 | 0.019                 | 0.958                  | 1.0              | 0.121               | 0.944             | 0.122             | 0.018             | 0.992                    | 1.0                    |
| p4 4                        | 0.167 | 0.999                | 1.0                | 0.988                  | 0.876             | 1.0                  | 1.0                   | 0.013               | 1.0               | 0.239             | 0.0               | 0.0               | 0.112                                     | 0.998              | 0.868              | 1.0                 | 0.029               | 0.967                 | 1.0                    | 0.126            | 0.985               | 0.126             | 0.012             | 0.985             | 1.0                      |                        |

Supplementary Table S3B. Support for species and higher-order groupings from gene translations

|                          |       | <i>An konderi</i> A + ss + <i>An oswaldoi</i> A + <i>An konderi</i> B | <i>An konderi</i> A + ss + <i>oswaldoi</i> A + <i>konderi</i> B + <i>oswaldoi</i> ss | <i>An konderi</i> A and ss + <i>oswaldoi</i> A + <i>konderi</i> B + <i>oswaldoi</i> ss + <i>evansae</i> | <i>An galtaoi</i> + <i>rangeli</i> | <i>An konderi</i> A + ss + <i>oswaldoi</i> A + <i>oswaldoi</i> ss + <i>konderi</i> B + <i>evansae</i> + <i>galtaoi</i> + <i>rangeli</i> | Nunestovani Complex ( <i>nunestovari</i> + <i>goeldii</i> ) | Nunestovani Complex + <i>dunhami</i> | Oswaldoi Subgroup | <i>An albertoi</i> + <i>strodei</i> | <i>An albertoi</i> + <i>strodei</i> + <i>arthuri</i> | <i>An albertoi</i> + <i>strodei</i> + <i>arthuri</i> + <i>rondoni</i> | <i>An albertoi</i> + <i>strodei</i> + <i>arthuri</i> + <i>rondoni</i> + CPForm | <i>An albertoi</i> + <i>strodei</i> + <i>arthuri</i> + <i>rondoni</i> + CPForm + <i>benarrochi</i> | Strodei Subgroup | Oswaldoi Series | Oswaldoi Series (no <i>An benarrochi</i> ) | Oswaldoi Group | Oswaldoi Group (no <i>An benarrochi</i> ) | Oswaldoi Group with <i>An braziliensis</i> | Oswaldoi Group without <i>An benarrochi</i> , with <i>An braziliensis</i> |     |
|--------------------------|-------|-----------------------------------------------------------------------|--------------------------------------------------------------------------------------|---------------------------------------------------------------------------------------------------------|------------------------------------|-----------------------------------------------------------------------------------------------------------------------------------------|-------------------------------------------------------------|--------------------------------------|-------------------|-------------------------------------|------------------------------------------------------|-----------------------------------------------------------------------|--------------------------------------------------------------------------------|----------------------------------------------------------------------------------------------------|------------------|-----------------|--------------------------------------------|----------------|-------------------------------------------|--------------------------------------------|---------------------------------------------------------------------------|-----|
| <i>An kompi</i> included | mb 1  | 0.002                                                                 | 0.006                                                                                | 0.004                                                                                                   | 0.0                                | 0.0                                                                                                                                     | 0.0                                                         | 0.008                                | 0.0               | 0.068                               | 0.566                                                | 0.996                                                                 | 0.0                                                                            | 0.0                                                                                                | 0.0              | 0.0             | 0.0                                        | 0.0            | 0.0                                       | 0.0                                        | 0.0                                                                       |     |
|                          | mb 2  | 0.004                                                                 | 0.006                                                                                | 0.006                                                                                                   | 0.004                              | 0.0                                                                                                                                     | 0.0                                                         | 0.020                                | 0.0               | 0.062                               | 0.612                                                | 1.0                                                                   | 0.002                                                                          | 0.0                                                                                                | 0.0              | 0.0             | 0.0                                        | 0.0            | 0.0                                       | 0.004                                      | 0.0                                                                       |     |
|                          | p4 0  | 0.006                                                                 | 0.006                                                                                | 0.004                                                                                                   | 0.0                                | 0.0                                                                                                                                     | 0.0                                                         | 0.018                                | 0.0               | 0.054                               | 0.576                                                | 1.0                                                                   | 0.0                                                                            | 0.0                                                                                                | 0.0              | 0.0             | 0.0                                        | 0.0            | 0.0                                       | 0.0                                        | 0.0                                                                       |     |
|                          | p4 1  | 0.006                                                                 | 0.0                                                                                  | 0.002                                                                                                   | 0.0                                | 0.0                                                                                                                                     | 0.0                                                         | 0.028                                | 0.0               | 0.062                               | 0.578                                                | 0.984                                                                 | 0.0                                                                            | 0.0                                                                                                | 0.0              | 0.0             | 0.0                                        | 0.0            | 0.0                                       | 0.0                                        | 0.0                                                                       |     |
|                          | p4 2  | 0.006                                                                 | 0.008                                                                                | 0.018                                                                                                   | 0.0                                | 0.0                                                                                                                                     | 0.002                                                       | 0.044                                | 0.0               | 0.112                               | 0.614                                                | 0.994                                                                 | 0.0                                                                            | 0.0                                                                                                | 0.0              | 0.0             | 0.0                                        | 0.0            | 0.0                                       | 0.002                                      | 0.0                                                                       |     |
|                          | p4 3  | 0.006                                                                 | 0.006                                                                                | 0.010                                                                                                   | 0.0                                | 0.0                                                                                                                                     | 0.002                                                       | 0.010                                | 0.0               | 0.084                               | 0.586                                                | 1.0                                                                   | 0.0                                                                            | 0.0                                                                                                | 0.0              | 0.0             | 0.0                                        | 0.0            | 0.0                                       | 0.0                                        | 0.0                                                                       | 0.0 |
|                          | p4 4  | 0.0                                                                   | 0.004                                                                                | 0.004                                                                                                   | 0.0                                | 0.0                                                                                                                                     | 0.0                                                         | 0.014                                | 0.0               | 0.066                               | 0.558                                                | 1.0                                                                   | 0.0                                                                            | 0.0                                                                                                | 0.0              | 0.0             | 0.0                                        | 0.0            | 0.0                                       | 0.0                                        | 0.0                                                                       | 0.0 |
|                          | p4 5  | 0.004                                                                 | 0.010                                                                                | 0.014                                                                                                   | 0.0                                | 0.0                                                                                                                                     | 0.0                                                         | 0.022                                | 0.0               | 0.092                               | 0.624                                                | 0.986                                                                 | 0.0                                                                            | 0.0                                                                                                | 0.0              | 0.0             | 0.0                                        | 0.0            | 0.0                                       | 0.004                                      | 0.0                                                                       |     |
|                          | p4 6  | 0.008                                                                 | 0.002                                                                                | 0.012                                                                                                   | 0.0                                | 0.0                                                                                                                                     | 0.0                                                         | 0.060                                | 0.0               | 0.092                               | 0.550                                                | 0.990                                                                 | 0.0                                                                            | 0.0                                                                                                | 0.0              | 0.0             | 0.0                                        | 0.0            | 0.0                                       | 0.010                                      | 0.0                                                                       |     |
|                          | p4 7  | 0.004                                                                 | 0.006                                                                                | 0.014                                                                                                   | 0.0                                | 0.0                                                                                                                                     | 0.0                                                         | 0.008                                | 0.0               | 0.088                               | 0.562                                                | 0.998                                                                 | 0.0                                                                            | 0.0                                                                                                | 0.0              | 0.0             | 0.0                                        | 0.0            | 0.0                                       | 0.0                                        | 0.0                                                                       | 0.0 |
| p4 8                     | 0.010 | 0.002                                                                 | 0.012                                                                                | 0.0                                                                                                     | 0.0                                | 0.0                                                                                                                                     | 0.014                                                       | 0.0                                  | 0.106             | 0.580                               | 0.996                                                | 0.0                                                                   | 0.0                                                                            | 0.0                                                                                                | 0.0              | 0.0             | 0.0                                        | 0.0            | 0.0                                       | 0.0                                        | 0.0                                                                       |     |
| p4 9                     | 0.006 | 0.002                                                                 | 0.004                                                                                | 0.0                                                                                                     | 0.0                                | 0.0                                                                                                                                     | 0.022                                                       | 0.0                                  | 0.068             | 0.608                               | 0.994                                                | 0.0                                                                   | 0.0                                                                            | 0.0                                                                                                | 0.0              | 0.0             | 0.004                                      | 0.0            | 0.006                                     | 0.0                                        |                                                                           |     |
| <i>An kompi</i> excluded | mb 1  | 0.004                                                                 | 0.0                                                                                  | 0.008                                                                                                   | 0.0                                | 0.0                                                                                                                                     | 0.0                                                         | 0.004                                | 0.0               | 0.056                               | 0.604                                                | 0.996                                                                 | 0.0                                                                            | 0.0                                                                                                | 0.0              | 0.0             | 0.0                                        | 0.0            | 0.0                                       | 0.0                                        | 0.0                                                                       |     |
|                          | mb 2  | 0.008                                                                 | 0.0                                                                                  | 0.016                                                                                                   | 0.0                                | 0.0                                                                                                                                     | 0.0                                                         | 0.016                                | 0.0               | 0.080                               | 0.548                                                | 1.0                                                                   | 0.0                                                                            | 0.0                                                                                                | 0.0              | 0.0             | 0.0                                        | 0.0            | 0.0                                       | 0.0                                        | 0.0                                                                       |     |
|                          | p4 0  | 0.001                                                                 | 0.0                                                                                  | 0.003                                                                                                   | 0.0                                | 0.0                                                                                                                                     | 0.0                                                         | 0.057                                | 0.0               | 0.026                               | 0.516                                                | 0.987                                                                 | 0.0                                                                            | 0.0                                                                                                | 0.0              | 0.0             | 0.001                                      | 0.0            | 0.007                                     | 0.0                                        |                                                                           |     |
|                          | p4 1  | 0.007                                                                 | 0.002                                                                                | 0.004                                                                                                   | 0.0                                | 0.0                                                                                                                                     | 0.0                                                         | 0.001                                | 0.0               | 0.033                               | 0.470                                                | 0.994                                                                 | 0.001                                                                          | 0.0                                                                                                | 0.0              | 0.0             | 0.0                                        | 0.0            | 0.0                                       | 0.0                                        | 0.0                                                                       |     |
|                          | p4 2  | 0.001                                                                 | 0.001                                                                                | 0.0                                                                                                     | 0.0                                | 0.0                                                                                                                                     | 0.0                                                         | 0.0                                  | 0.0               | 0.033                               | 0.425                                                | 1.0                                                                   | 0.002                                                                          | 0.0                                                                                                | 0.0              | 0.0             | 0.0                                        | 0.0            | 0.0                                       | 0.004                                      | 0.0                                                                       |     |
|                          | p4 3  | 0.005                                                                 | 0.002                                                                                | 0.0                                                                                                     | 0.0                                | 0.0                                                                                                                                     | 0.0                                                         | 0.002                                | 0.0               | 0.034                               | 0.526                                                | 0.997                                                                 | 0.0                                                                            | 0.0                                                                                                | 0.0              | 0.0             | 0.0                                        | 0.0            | 0.0                                       | 0.0                                        | 0.0                                                                       |     |
| p4 4                     | 0.0   | 0.0                                                                   | 0.0                                                                                  | 0.0                                                                                                     | 0.0                                | 0.0                                                                                                                                     | 0.002                                                       | 0.0                                  | 0.035             | 0.451                               | 0.942                                                | 0.0                                                                   | 0.0                                                                            | 0.0                                                                                                | 0.0              | 0.0             | 0.0                                        | 0.0            | 0.0                                       | 0.0                                        |                                                                           |     |
| No outgroup              | mb 1  | 0.002                                                                 | 0.002                                                                                | 0.004                                                                                                   | 0.0                                | 0.0                                                                                                                                     | 0.0                                                         | 0.038                                | 0.0               | 0.068                               | 0.614                                                | 1.0                                                                   | 0.0                                                                            | 0.0                                                                                                | 0.0              | 0.0             | 0.0                                        | 0.0            | 0.0                                       | 0.006                                      | 0.0                                                                       |     |
|                          | mb 2  | 0.0                                                                   | 0.006                                                                                | 0.006                                                                                                   | 0.0                                | 0.0                                                                                                                                     | 0.0                                                         | 0.096                                | 0.0               | 0.054                               | 0.570                                                | 1.0                                                                   | 0.002                                                                          | 0.0                                                                                                | 0.0              | 0.0             | 0.0                                        | 0.0            | 0.0                                       | 0.002                                      | 0.0                                                                       |     |
|                          | p4 0  | 0.001                                                                 | 0.001                                                                                | 0.003                                                                                                   | 0.0                                | 0.0                                                                                                                                     | 0.0                                                         | 0.004                                | 0.0               | 0.033                               | 0.473                                                | 1.0                                                                   | 0.0                                                                            | 0.0                                                                                                | 0.0              | 0.0             | 0.0                                        | 0.0            | 0.0                                       | 0.001                                      | 0.0                                                                       |     |
|                          | p4 1  | 0.003                                                                 | 0.0                                                                                  | 0.006                                                                                                   | 0.0                                | 0.0                                                                                                                                     | 0.0                                                         | 0.006                                | 0.0               | 0.035                               | 0.447                                                | 1.0                                                                   | 0.0                                                                            | 0.0                                                                                                | 0.0              | 0.0             | 0.0                                        | 0.0            | 0.0                                       | 0.001                                      | 0.0                                                                       |     |
|                          | p4 2  | 0.001                                                                 | 0.004                                                                                | 0.0                                                                                                     | 0.0                                | 0.0                                                                                                                                     | 0.0                                                         | 0.021                                | 0.0               | 0.029                               | 0.535                                                | 1.0                                                                   | 0.0                                                                            | 0.0                                                                                                | 0.0              | 0.0             | 0.0                                        | 0.0            | 0.0                                       | 0.001                                      | 0.0                                                                       |     |
|                          | p4 3  | 0.002                                                                 | 0.0                                                                                  | 0.002                                                                                                   | 0.0                                | 0.0                                                                                                                                     | 0.0                                                         | 0.020                                | 0.0               | 0.039                               | 0.527                                                | 1.0                                                                   | 0.0                                                                            | 0.0                                                                                                | 0.0              | 0.0             | 0.0                                        | 0.0            | 0.0                                       | 0.001                                      | 0.0                                                                       |     |
| p4 4                     | 0.001 | 0.002                                                                 | 0.007                                                                                | 0.0                                                                                                     | 0.0                                | 0.0                                                                                                                                     | 0.006                                                       | 0.0                                  | 0.038             | 0.481                               | 0.999                                                | 0.0                                                                   | 0.0                                                                            | 0.0                                                                                                | 0.0              | 0.0             | 0.0                                        | 0.0            | 0.0                                       | 0.0                                        |                                                                           |     |

Supplementary Table S3C. Support for species and higher-order groupings from gene translations

|                             |       | <i>An triannulatus + darlingi</i> | <i>An triannulatus + rangeli</i> | <i>An triannulatus + argyritarsis</i> | <i>An triannulatus + lanei</i> | <i>An argyritarsis + darlingi</i> | <i>An argyritarsis + lanei + darlingi</i> | Argyritarsis Series | Argyritarsis Series + <i>An triannulatus</i> | Albitarsis Group/Complex | Albitarsis Series | Argyritarsis Section | Argyritarsis Section + <i>An triannulatus</i> | <i>An antunesi + lutzii B</i> | <i>An lutzii ss + lutzii A</i> | Myzorhynchella Crown (no <i>An parvus</i> ) | Myzorhynchella Section | outgroup |
|-----------------------------|-------|-----------------------------------|----------------------------------|---------------------------------------|--------------------------------|-----------------------------------|-------------------------------------------|---------------------|----------------------------------------------|--------------------------|-------------------|----------------------|-----------------------------------------------|-------------------------------|--------------------------------|---------------------------------------------|------------------------|----------|
| <i>An kompi</i><br>included | mb 1  | 0.002                             | 0.284                            | 0.0                                   | 0.014                          | 0.416                             | 0.0                                       | 0.0                 | 0.0                                          | 0.760                    | 0.002             | 0.0                  | 0.0                                           | 1.0                           | 0.062                          | 0.958                                       | 0.874                  | 0.354    |
|                             | mb 2  | 0.0                               | 0.276                            | 0.0                                   | 0.004                          | 0.570                             | 0.002                                     | 0.002               | 0.0                                          | 0.690                    | 0.0               | 0.0                  | 0.0                                           | 1.0                           | 0.050                          | 0.968                                       | 0.462                  | 0.038    |
|                             | p4 0  | 0.0                               | 0.368                            | 0.0                                   | 0.018                          | 0.742                             | 0.0                                       | 0.0                 | 0.0                                          | 0.680                    | 0.0               | 0.0                  | 0.0                                           | 1.0                           | 0.058                          | 0.936                                       | 0.966                  | 0.784    |
|                             | p4 1  | 0.0                               | 0.396                            | 0.0                                   | 0.012                          | 0.852                             | 0.0                                       | 0.0                 | 0.0                                          | 0.840                    | 0.012             | 0.0                  | 0.0                                           | 0.998                         | 0.054                          | 0.934                                       | 0.922                  | 0.988    |
|                             | p4 2  | 0.0                               | 0.398                            | 0.0                                   | 0.038                          | 0.950                             | 0.004                                     | 0.004               | 0.0                                          | 0.608                    | 0.002             | 0.0                  | 0.0                                           | 0.998                         | 0.066                          | 0.952                                       | 0.948                  | 0.974    |
|                             | p4 3  | 0.006                             | 0.270                            | 0.0                                   | 0.042                          | 0.658                             | 0.0                                       | 0.0                 | 0.0                                          | 0.698                    | 0.0               | 0.0                  | 0.0                                           | 1.0                           | 0.062                          | 0.982                                       | 0.352                  | 0.0      |
|                             | p4 4  | 0.0                               | 0.320                            | 0.0                                   | 0.046                          | 0.876                             | 0.0                                       | 0.0                 | 0.0                                          | 0.640                    | 0.0               | 0.0                  | 0.0                                           | 0.998                         | 0.040                          | 0.936                                       | 0.946                  | 0.882    |
|                             | p4 5  | 0.002                             | 0.410                            | 0.0                                   | 0.024                          | 0.698                             | 0.0                                       | 0.0                 | 0.0                                          | 0.724                    | 0.0               | 0.0                  | 0.0                                           | 1.0                           | 0.052                          | 0.974                                       | 0.768                  | 0.484    |
|                             | p4 6  | 0.002                             | 0.406                            | 0.0                                   | 0.024                          | 0.582                             | 0.002                                     | 0.002               | 0.0                                          | 0.842                    | 0.002             | 0.0                  | 0.0                                           | 0.996                         | 0.054                          | 0.958                                       | 0.748                  | 0.458    |
|                             | p4 7  | 0.0                               | 0.388                            | 0.0                                   | 0.026                          | 0.972                             | 0.0                                       | 0.0                 | 0.0                                          | 0.770                    | 0.0               | 0.0                  | 0.0                                           | 0.996                         | 0.036                          | 0.932                                       | 0.600                  | 0.588    |
| p4 8                        | 0.002 | 0.382                             | 0.0                              | 0.024                                 | 0.386                          | 0.0                               | 0.0                                       | 0.0                 | 0.770                                        | 0.0                      | 0.0               | 0.0                  | 0.996                                         | 0.062                         | 0.972                          | 0.634                                       | 0.038                  |          |
| p4 9                        | 0.0   | 0.406                             | 0.0                              | 0.024                                 | 0.876                          | 0.004                             | 0.004                                     | 0.0                 | 0.822                                        | 0.0                      | 0.0               | 0.0                  | 0.998                                         | 0.056                         | 0.962                          | 0.896                                       | 0.944                  |          |
| <i>An kompi</i><br>excluded | mb 1  | 0.0                               | 0.372                            | 0.0                                   | 0.004                          | 0.980                             | 0.0                                       | 0.0                 | 0.0                                          | 0.772                    | 0.0               | 0.0                  | 0.0                                           | 1.0                           | 0.040                          | 0.916                                       | 0.940                  | 0.840    |
|                             | mb 2  | 0.0                               | 0.308                            | 0.0                                   | 0.004                          | 0.976                             | 0.0                                       | 0.0                 | 0.0                                          | 0.864                    | 0.0               | 0.0                  | 0.0                                           | 1.0                           | 0.044                          | 0.956                                       | 0.948                  | 0.632    |
|                             | p4 0  | 0.0                               | 0.449                            | 0.0                                   | 0.011                          | 0.853                             | 0.0                                       | 0.0                 | 0.0                                          | 0.821                    | 0.001             | 0.0                  | 0.0                                           | 1.0                           | 0.029                          | 0.819                                       | 0.936                  | 1.0      |
|                             | p4 1  | 0.001                             | 0.261                            | 0.0                                   | 0.029                          | 0.916                             | 0.001                                     | 0.001               | 0.0                                          | 0.538                    | 0.0               | 0.0                  | 0.0                                           | 0.999                         | 0.021                          | 0.839                                       | 0.950                  | 1.0      |
|                             | p4 2  | 0.001                             | 0.274                            | 0.0                                   | 0.032                          | 0.939                             | 0.0                                       | 0.0                 | 0.0                                          | 0.697                    | 0.0               | 0.0                  | 0.0                                           | 0.999                         | 0.027                          | 0.876                                       | 0.953                  | 1.0      |
|                             | p4 3  | 0.001                             | 0.506                            | 0.0                                   | 0.001                          | 0.828                             | 0.0                                       | 0.0                 | 0.0                                          | 0.988                    | 0.0               | 0.0                  | 0.0                                           | 1.0                           | 0.021                          | 0.838                                       | 0.766                  | 0.0      |
| p4 4                        | 0.0   | 0.313                             | 0.0                              | 0.010                                 | 0.935                          | 0.001                             | 0.001                                     | 0.0                 | 0.663                                        | 0.0                      | 0.0               | 0.0                  | 1.0                                           | 0.034                         | 0.840                          | 0.956                                       | 1.0                    |          |
| No outgroup                 | mb 1  | 0.0                               | 0.388                            | 0.0                                   | 0.002                          | 0.994                             | 0.0                                       | 0.0                 | 0.0                                          | 1.0                      | 0.0               | 0.0                  | 0.0                                           | 1.0                           | 0.028                          | 0.932                                       | 0.972                  | na       |
|                             | mb 2  | 0.0                               | 0.454                            | 0.0                                   | 0.006                          | 0.990                             | 0.0                                       | 0.0                 | 0.0                                          | 1.0                      | 0.0               | 0.0                  | 0.0                                           | 1.0                           | 0.028                          | 0.944                                       | 0.960                  | na       |
|                             | p4 0  | 0.0                               | 0.392                            | 0.0                                   | 0.023                          | 0.953                             | 0.002                                     | 0.002               | 0.0                                          | 1.0                      | 0.0               | 0.0                  | 0.0                                           | 1.0                           | 0.019                          | 0.814                                       | 0.940                  | na       |
|                             | p4 1  | 0.0                               | 0.438                            | 0.0                                   | 0.015                          | 0.970                             | 0.002                                     | 0.002               | 0.0                                          | 1.0                      | 0.0               | 0.0                  | 0.0                                           | 1.0                           | 0.018                          | 0.785                                       | 0.937                  | na       |
|                             | p4 2  | 0.0                               | 0.506                            | 0.0                                   | 0.007                          | 0.948                             | 0.0                                       | 0.0                 | 0.0                                          | 1.0                      | 0.001             | 0.0                  | 0.0                                           | 1.0                           | 0.028                          | 0.788                                       | 0.956                  | na       |
|                             | p4 3  | 0.0                               | 0.491                            | 0.0                                   | 0.018                          | 0.934                             | 0.001                                     | 0.001               | 0.001                                        | 1.0                      | 0.0               | 0.0                  | 0.0                                           | 1.0                           | 0.023                          | 0.765                                       | 0.942                  | na       |
|                             | p4 4  | 0.0                               | 0.389                            | 0.0                                   | 0.020                          | 0.952                             | 0.0                                       | 0.0                 | 0.0                                          | 1.0                      | 0.0               | 0.0                  | 0.0                                           | 0.999                         | 0.027                          | 0.836                                       | 0.957                  | na       |
