# Supplementary material for: Phylogenetic Analysis and DNA-based Species Confirmation in Anopheles (Nyssorhynchus)
Source: PubMed Central journal article supplement (PMC3563636; doi:10.1371/journal.pone.0054063), 2013-02-04
Supplement: pone.0054063.s006.pdf [file pone.0054063.s006.pdf]

**Supplementary Table S4. Support for species from three concatenated genes and from single genes only**

| species                                               | mb 1  | mb 2  | p4 0  | p4 1  | p4 2  | p4 3  | p4 4  |
|-------------------------------------------------------|-------|-------|-------|-------|-------|-------|-------|
| Analysis of all three genes, in 8 data partitions     |       |       |       |       |       |       |       |
| <i>An albertoi</i>                                    | 1.0   | 1.0   | 1.0   | 1.0   | 1.0   | 1.0   | 1.0   |
| <i>An albitarsis</i>                                  | 1.0   | 1.0   | 1.0   | 1.0   | 1.0   | 1.0   | 1.0   |
| <i>An antunesi</i>                                    | 1.0   | 1.0   | 1.0   | 1.0   | 1.0   | 1.0   | 1.0   |
| <i>An argyritarsis</i>                                | 1.0   | 1.0   | 1.0   | 1.0   | 1.0   | 1.0   | 1.0   |
| <i>An arthuri</i>                                     | 1.0   | 1.0   | 1.0   | 1.0   | 1.0   | 1.0   | 1.0   |
| <i>An atacemensis</i>                                 | 1.0   | 1.0   | 1.0   | 1.0   | 1.0   | 1.0   | 1.0   |
| <i>An benarrochi</i>                                  | 1.0   | 1.0   | 1.0   | 1.0   | 1.0   | 1.0   | 1.0   |
| <i>An braziliensis</i>                                | 1.0   | 1.0   | 1.0   | 1.0   | 1.0   | 1.0   | 1.0   |
| <i>An darlingi</i>                                    | 1.0   | 1.0   | 1.0   | 1.0   | 1.0   | 1.0   | 1.0   |
| <i>An deaneorum</i>                                   | 1.0   | 1.0   | 1.0   | 1.0   | 1.0   | 1.0   | 1.0   |
| <i>An dunhami</i>                                     | 1.0   | 0.956 | 1.0   | 1.0   | 1.0   | 1.0   | 1.0   |
| <i>An evansae</i>                                     | 1.0   | 1.0   | 1.0   | 1.0   | 1.0   | 1.0   | 1.0   |
| <i>An galvaoi</i>                                     | 1.0   | 1.0   | 1.0   | 1.0   | 1.0   | 1.0   | 1.0   |
| <i>An goeldii</i>                                     | 0.704 | 0.708 | 0.790 | 0.768 | 0.690 | 0.600 | 0.774 |
| <i>An guarani</i>                                     | 1.0   | 1.0   | 1.0   | 1.0   | 1.0   | 1.0   | 1.0   |
| <i>An konderi ss</i>                                  | 1.0   | 0.984 | 0.994 | 1.0   | 0.980 | 0.998 | 0.994 |
| <i>An konderi A</i>                                   | 0.992 | 1.0   | 0.998 | 1.0   | 0.996 | 0.990 | 0.996 |
| <i>An lanei</i>                                       | 1.0   | 1.0   | 1.0   | 1.0   | 1.0   | 1.0   | 1.0   |
| <i>An lutzii B</i>                                    | 0.720 | 0.664 | 0.656 | 0.664 | 0.686 | 0.714 | 0.732 |
| <i>An lutzii A</i>                                    | 1.0   | 1.0   | 1.0   | 1.0   | 1.0   | 1.0   | 1.0   |
| <i>An lutzii ss</i>                                   | 1.0   | 1.0   | 1.0   | 1.0   | 1.0   | 1.0   | 1.0   |
| <i>An marajoara</i>                                   | 1.0   | 1.0   | 1.0   | 1.0   | 1.0   | 1.0   | 1.0   |
| <i>An nuneztovari</i>                                 | 0.996 | 0.980 | 0.970 | 0.990 | 0.992 | 0.998 | 0.988 |
| <i>An osvaldoi A</i>                                  | 0.996 | 1.0   | 0.996 | 1.0   | 0.998 | 1.0   | 0.996 |
| <i>An osvaldoi ss</i>                                 | 0.720 | 0.664 | 0.800 | 1.0   | 0.668 | 0.902 | 0.642 |
| <i>An parvus</i>                                      | 1.0   | 1.0   | 1.0   | 1.0   | 1.0   | 1.0   | 1.0   |
| <i>An pristinus</i>                                   | 1.0   | 1.0   | 1.0   | 1.0   | 1.0   | 1.0   | 1.0   |
| <i>An rangeli</i>                                     | 1.0   | 1.0   | 1.0   | 1.0   | 1.0   | 1.0   | 1.0   |
| <i>An rondoni</i>                                     | 1.0   | 1.0   | 1.0   | 1.0   | 1.0   | 1.0   | 1.0   |
| <i>An strodei</i>                                     | 1.0   | 0.996 | 0.922 | 0.828 | 0.998 | 0.906 | 0.380 |
| <i>An strodei CPform</i>                              | 1.0   | 1.0   | 1.0   | 1.0   | 1.0   | 1.0   | 1.0   |
| <i>An triannulatus</i>                                | 1.0   | 1.0   | 1.0   | 1.0   | 1.0   | 1.0   | 1.0   |
| Analysis of the white gene only, in 3 data partitions |       |       |       |       |       |       |       |
| <i>An albitarsis</i>                                  | 0.996 | 0.992 | 0.992 | 0.992 | 0.990 | 0.990 | 0.990 |
| <i>An antunesi</i>                                    | 0.980 | 0.980 | 0.974 | 0.980 | 0.974 | 0.982 | 0.976 |
| <i>An argyritarsis</i>                                | 1.0   | 1.0   | 1.0   | 1.0   | 1.0   | 1.0   | 1.0   |
| <i>An arthuri</i>                                     | 0.612 | 0.604 | 0.610 | 0.664 | 0.630 | 0.634 | 0.586 |
| <i>An benarrochi</i>                                  | 1.0   | 0.996 | 0.998 | 0.996 | 1.0   | 1.0   | 1.0   |
| <i>An braziliensis</i>                                | 1.0   | 1.0   | 1.0   | 1.0   | 1.0   | 1.0   | 1.0   |
| <i>An darlingi</i>                                    | 1.0   | 1.0   | 0.996 | 1.0   | 1.0   | 0.996 | 1.0   |
| <i>An deaneorum</i>                                   | 1.0   | 1.0   | 1.0   | 1.0   | 1.0   | 1.0   | 1.0   |
| <i>An dunhami</i>                                     | 0.180 | 0.180 | 0.220 | 0.236 | 0.254 | 0.238 | 0.262 |
| <i>An evansae</i>                                     | 0.780 | 0.784 | 0.730 | 0.774 | 0.832 | 0.826 | 0.764 |
| <i>An galvaoi</i>                                     | 0.996 | 0.984 | 0.992 | 0.992 | 0.996 | 0.996 | 0.996 |
| <i>An goeldii</i>                                     | 0.364 | 0.376 | 0.302 | 0.390 | 0.300 | 0.398 | 0.380 |
| <i>An konderi ss</i>                                  | 0.016 | 0.024 | 0.010 | 0.014 | 0.018 | 0.006 | 0.016 |
| <i>An konderi A</i>                                   | 0.024 | 0.064 | 0.078 | 0.104 | 0.066 | 0.072 | 0.088 |
| <i>An lutzii B</i>                                    | 1.0   | 1.0   | 0.998 | 0.998 | 0.996 | 0.998 | 0.998 |
| <i>An lutzii A</i>                                    | 1.0   | 1.0   | 1.0   | 1.0   | 1.0   | 1.0   | 1.0   |
| <i>An lutzii ss</i>                                   | 0.996 | 0.992 | 0.994 | 0.990 | 0.992 | 0.992 | 0.996 |
| <i>An marajoara</i>                                   | 0.020 | 0.040 | 0.034 | 0.030 | 0.032 | 0.062 | 0.032 |
| <i>An nuneztovari</i>                                 | 0.988 | 0.992 | 0.996 | 0.986 | 0.998 | 0.992 | 0.994 |
| <i>An osvaldoi A</i>                                  | 0.132 | 0.096 | 0.124 | 0.132 | 0.138 | 0.164 | 0.152 |
| <i>An osvaldoi ss</i>                                 | 0.908 | 0.880 | 0.924 | 0.898 | 0.884 | 0.886 | 0.900 |
| <i>An parvus</i>                                      | 1.0   | 1.0   | 1.0   | 1.0   | 1.0   | 1.0   | 1.0   |
| <i>An pristinus</i>                                   | 0.992 | 0.964 | 0.976 | 0.978 | 0.992 | 0.980 | 0.982 |
| <i>An rangeli</i>                                     | 0.980 | 0.976 | 0.958 | 0.942 | 0.950 | 0.964 | 0.928 |
| <i>An rondoni</i>                                     | 1.0   | 0.988 | 0.980 | 0.984 | 0.994 | 0.994 | 0.996 |
| <i>An strodei</i>                                     | 0.004 | 0.024 | 0.008 | 0.018 | 0.006 | 0.010 | 0.010 |
| <i>An strodei CPform</i>                              | 0.996 | 1.0   | 0.998 | 0.990 | 0.998 | 0.998 | 1.0   |
| <i>An triannulatus</i>                                | 1.0   | 1.0   | 1.0   | 1.0   | 1.0   | 1.0   | 1.0   |

| species                                             | mb 1  | mb 2  | p4 0  | p4 1  | p4 2  | p4 3  | p4 4  |
|-----------------------------------------------------|-------|-------|-------|-------|-------|-------|-------|
| Analysis of the CAD gene only, in 3 data partitions |       |       |       |       |       |       |       |
| <i>An albertoi</i>                                  | 1.0   | 1.0   | 1.0   | 1.0   | 1.0   | 1.0   | 1.0   |
| <i>An albitarsis</i>                                | 1.0   | 1.0   | 1.0   | 1.0   | 1.0   | 1.0   | 1.0   |
| <i>An antunesi</i>                                  | 1.0   | 1.0   | 1.0   | 0.998 | 1.0   | 1.0   | 1.0   |
| <i>An argyritarsis</i>                              | 1.0   | 1.0   | 0.954 | 1.0   | 0.980 | 1.0   | 0.972 |
| <i>An arthuri</i>                                   | 1.0   | 1.0   | 1.0   | 1.0   | 1.0   | 1.0   | 1.0   |
| <i>An benarrochi</i>                                | 1.0   | 1.0   | 1.0   | 1.0   | 1.0   | 1.0   | 1.0   |
| <i>An braziliensis</i>                              | 1.0   | 1.0   | 1.0   | 1.0   | 1.0   | 1.0   | 1.0   |
| <i>An darlingi</i>                                  | 1.0   | 1.0   | 1.0   | 1.0   | 1.0   | 1.0   | 1.0   |
| <i>An deaneorum</i>                                 | 1.0   | 1.0   | 1.0   | 1.0   | 1.0   | 1.0   | 1.0   |
| <i>An dunhami</i>                                   | 1.0   | 1.0   | 1.0   | 1.0   | 1.0   | 1.0   | 1.0   |
| <i>An evansae</i>                                   | 1.0   | 1.0   | 1.0   | 1.0   | 1.0   | 1.0   | 1.0   |
| <i>An galvaoi</i>                                   | 1.0   | 1.0   | 1.0   | 1.0   | 1.0   | 1.0   | 1.0   |
| <i>An goeldii</i>                                   | 0.0   | 0.520 | 0.026 | 1.0   | 0.928 | 0.010 | 0.004 |
| <i>An konderi ss</i>                                | 0.972 | 1.0   | 0.870 | 0.974 | 0.922 | 0.984 | 0.960 |
| <i>An konderi A</i>                                 | 0.964 | 0.992 | 0.992 | 0.984 | 0.972 | 0.924 | 0.844 |
| <i>An lanei</i>                                     | 1.0   | 1.0   | 1.0   | 1.0   | 1.0   | 1.0   | 1.0   |
| <i>An lutzii B</i>                                  | 0.076 | 0.084 | 0.130 | 0.118 | 0.116 | 0.122 | 0.124 |
| <i>An lutzii A</i>                                  | 1.0   | 1.0   | 1.0   | 1.0   | 1.0   | 1.0   | 1.0   |
| <i>An lutzii ss</i>                                 | 1.0   | 1.0   | 1.0   | 1.0   | 1.0   | 1.0   | 1.0   |
| <i>An marajoara</i>                                 | 1.0   | 1.0   | 1.0   | 1.0   | 1.0   | 1.0   | 1.0   |
| <i>An nuneztovari</i>                               | 0.080 | 0.048 | 0.044 | 0.004 | 0.080 | 0.036 | 0.046 |
| <i>An osvaldoi A</i>                                | 0.084 | 0.036 | 0.172 | 0.122 | 0.138 | 0.108 | 0.128 |
| <i>An osvaldoi ss</i>                               | 0.732 | 0.816 | 0.664 | 0.798 | 0.656 | 0.792 | 0.552 |
| <i>An parvus</i>                                    | 1.0   | 1.0   | 1.0   | 1.0   | 1.0   | 1.0   | 1.0   |
| <i>An pristinus</i>                                 | 1.0   | 1.0   | 1.0   | 0.996 | 1.0   | 1.0   | 1.0   |
| <i>An rangeli</i>                                   | 1.0   | 1.0   | 1.0   | 1.0   | 1.0   | 1.0   | 1.0   |
| <i>An rondoni</i>                                   | 1.0   | 1.0   | 1.0   | 1.0   | 0.998 | 1.0   | 1.0   |
| <i>An strodei</i>                                   | 0.852 | 0.976 | 0.776 | 0.862 | 1.0   | 0.864 | 1.0   |
| <i>An strodei CPform</i>                            | 1.0   | 1.0   | 1.0   | 1.0   | 1.0   | 1.0   | 1.0   |
| <i>An triannulatus</i>                              | 1.0   | 1.0   | 0.968 | 1.0   | 0.914 | 1.0   | 0.866 |
| Analysis of the COI gene only, in 2 data partitions |       |       |       |       |       |       |       |
| <i>An albertoi</i>                                  | 0.0   | 0.0   | 0.0   | 0.0   | 0.0   | 0.0   | 0.0   |
| <i>An albitarsis</i>                                | 0.976 | 0.988 | 0.994 | 0.992 | 0.992 | 0.996 | 0.980 |
| <i>An antunesi</i>                                  | 0.476 | 0.496 | 0.500 | 0.538 | 0.450 | 0.486 | 0.472 |
| <i>An argyritarsis</i>                              | 1.0   | 1.0   | 1.0   | 1.0   | 1.0   | 1.0   | 1.0   |
| <i>An arthuri</i>                                   | 0.172 | 0.208 | 0.208 | 0.210 | 0.222 | 0.192 | 0.210 |
| <i>An atacemensis</i>                               | 1.0   | 0.996 | 0.998 | 0.994 | 0.998 | 0.996 | 1.0   |
| <i>An benarrochi</i>                                | 1.0   | 1.0   | 1.0   | 1.0   | 1.0   | 1.0   | 1.0   |
| <i>An braziliensis</i>                              | 1.0   | 1.0   | 1.0   | 1.0   | 1.0   | 1.0   | 1.0   |
| <i>An darlingi</i>                                  | 1.0   | 1.0   | 1.0   | 1.0   | 1.0   | 1.0   | 1.0   |
| <i>An deaneorum</i>                                 | 0.932 | 0.936 | 0.958 | 0.956 | 0.964 | 0.958 | 0.978 |
| <i>An dunhami</i>                                   | 0.228 | 0.236 | 0.308 | 0.256 | 0.330 | 0.270 | 0.270 |
| <i>An evansae</i>                                   | 0.0   | 0.0   | 0.0   | 0.0   | 0.0   | 0.0   | 0.0   |
| <i>An galvaoi</i>                                   | 1.0   | 1.0   | 1.0   | 1.0   | 1.0   | 1.0   | 1.0   |
| <i>An goeldii</i>                                   | 0.0   | 0.0   | 0.0   | 0.0   | 0.0   | 0.0   | 0.0   |
| <i>An guarani</i>                                   | 1.0   | 1.0   | 1.0   | 1.0   | 1.0   | 1.0   | 1.0   |
| <i>An konderi ss</i>                                | 0.532 | 0.540 | 0.620 | 0.424 | 0.474 | 0.372 | 0.524 |
| <i>An konderi A</i>                                 | 0.996 | 0.992 | 0.992 | 1.0   | 0.992 | 0.998 | 0.994 |
| <i>An lutzii B</i>                                  | 0.024 | 0.016 | 0.028 | 0.034 | 0.032 | 0.038 | 0.028 |
| <i>An lutzii A</i>                                  | 1.0   | 1.0   | 1.0   | 1.0   | 1.0   | 1.0   | 1.0   |
| <i>An lutzii ss</i>                                 | 1.0   | 1.0   | 1.0   | 1.0   | 1.0   | 1.0   | 1.0   |
| <i>An marajoara</i>                                 | 0.956 | 0.940 | 0.952 | 0.920 | 0.944 | 0.956 | 0.928 |
| <i>An nuneztovari</i>                               | 0.0   | 0.0   | 0.0   | 0.0   | 0.0   | 0.0   | 0.0   |
| <i>An osvaldoi A</i>                                | 1.0   | 1.0   | 1.0   | 1.0   | 1.0   | 1.0   | 1.0   |
| <i>An osvaldoi ss</i>                               | 0.0   | 0.0   | 0.0   | 0.0   | 0.0   | 0.0   | 0.0   |
| <i>An parvus</i>                                    | 1.0   | 1.0   | 1.0   | 1.0   | 1.0   | 1.0   | 1.0   |
| <i>An pristinus</i>                                 | 1.0   | 1.0   | 1.0   | 1.0   | 1.0   | 1.0   | 1.0   |
| <i>An rangeli</i>                                   | 1.0   | 1.0   | 1.0   | 1.0   | 1.0   | 1.0   | 1.0   |
| <i>An rondoni</i>                                   | 0.700 | 0.640 | 0.678 | 0.648 | 0.638 | 0.680 | 0.644 |
| <i>An strodei</i>                                   | 0.0   | 0.004 | 0.0   | 0.0   | 0.002 | 0.0   | 0.004 |
| <i>An strodei CPform</i>                            | 1.0   | 1.0   | 1.0   | 1.0   | 1.0   | 1.0   | 1.0   |
| <i>An triannulatus</i>                              | 1.0   | 1.0   | 1.0   | 1.0   | 1.0   | 1.0   | 1.0   |
