# Supplementary material for: Phylogenetic Analysis and DNA-based Species Confirmation in Anopheles (Nyssorhynchus)
Source: PubMed Central journal article supplement (PMC3563636; doi:10.1371/journal.pone.0054063), 2013-02-04
Supplement: pone.0054063.s007.pdf [file pone.0054063.s007.pdf]

## Supplemental Table S5: Intraspecific K2P distances greater than 3%: Possible candidates for new species

This table shows pairwise intraspecific K2P distances that exceed 3%. One of the pair would be a possible candidate for placement in another species.

| K2P distance |                             |                            |
|--------------|-----------------------------|----------------------------|
| 0.0357       | An_parvus_AS5_1             | An_parvus_MG07_9_1         |
| 0.0357       | An_parvus_AS5_2             | An_parvus_MG07_9_1         |
| 0.0329       | An_parvus_AS5_3             | An_parvus_MG07_9_1         |
| 0.0329       | An_parvus_AS5_4             | An_parvus_MG07_9_1         |
| 0.0362       | An_parvus_MG07_9_1          | An_parvus_MG56_2           |
| 0.0346       | An_parvus_MG07_9_1          | An_parvus_PR28_18_1        |
| 0.0345       | An_parvus_MG07_9_1          | An_parvus_PR28_5_1         |
| 0.0362       | An_parvus_MG07_9_1          | An_parvus_PR28_65_6        |
| 0.0411       | An_argyritarsis_CE17_14_100 | An_argyritarsis_sl_MG25_4  |
| 0.0408       | An_argyritarsis_CE20_18_A   | An_argyritarsis_sl_MG25_4  |
| 0.0392       | An_argyritarsis_CE20_8_3    | An_argyritarsis_sl_MG25_4  |
| 0.0424       | An_argyritarsis_MG04_03     | An_argyritarsis_sl_MG25_4  |
| 0.0334       | An_triannulatus_AC1_108     | An_triannulatus_ES03_03_01 |
| 0.0301       | An_triannulatus_ES03_03_01  | An_triannulatus_SP09_02    |
| 0.0343       | An_oswaldoi_ES08_11_07      | An_oswaldoi_SP22_9         |
| 0.0360       | An_oswaldoi_SP03_06         | An_oswaldoi_SP22_9         |
| 0.0492       | An_lutzii_B369              | An_lutzii_sl1_RS16a        |
| 0.0492       | An_lutzii_B369              | An_lutzii_sl1_RS16b        |
| 0.0346       | An_evansae_PR19_10_104      | An_evansae_SP12_44         |
| 0.0314       | An_evansae_SP12_28          | An_evansae_SP12_44         |
| 0.0346       | An_evansae_SP12_44          | An_evansae_SP18_27         |
| 0.0330       | An_evansae_SP12_44          | An_evansae_VP06_7_4        |
