# Supplementary material for: Phylogenetic Analysis and DNA-based Species Confirmation in Anopheles (Nyssorhynchus)
Source: PubMed Central journal article supplement (PMC3563636; doi:10.1371/journal.pone.0054063), 2013-02-04
Supplement: pone.0054063.s010.pdf [file pone.0054063.s010.pdf]

## Supplemental Table S8. Specimens and sequences used

Three genes were used — the nuclear *white* and *CAD* genes, and the mitochondrial *COI* gene. There were, in the sequences from the three genes, 144 specimens represented.

|     | Name                         | White | CAD | COI |
|-----|------------------------------|-------|-----|-----|
| 1   | An_albertoi_MG07_12_4        | +     | +   | +   |
| 2   | An_albertoi_MG07_7_10        | +     | +   | +   |
| 3   | An_albitarsis_MG11_20_3      | +     | +   | +   |
| 4   | An_albitarsis_SP104_2_2      | +     | +   | +   |
| 5   | An_albitarsis_VP06_01_01     | +     | +   | +   |
| 6   | An_antunesi_RJ03_11          | +     | +   | +   |
| 7   | An_antunesi_RJ03_12          | +     | +   | +   |
| 8   | An_antunesi_RJ03_13          | +     | +   | +   |
| 9   | An_antunesi_RJ03_6           | +     | +   | +   |
| 10  | An_antunesi_VP09_17          | +     | +   | +   |
| 11  | An_antunesi_VP11b            | +     | +   | +   |
| 12  | An_argyritarsis_CE17_14_100  | +     | +   | +   |
| 13  | An_argyritarsis_CE20_18_A    | +     | +   | +   |
| 14  | An_argyritarsis_CE20_8_3     | +     | +   | +   |
| 15  | An_argyritarsis_MG04_03      | +     | +   | +   |
| 16  | An_argyritarsis_sl_MG25_4    | +     | +   | +   |
| 17  | An_arthuri_MG07_6_3          | +     | +   | +   |
| 18  | An_arthuri_MG24_1            | +     | +   | +   |
| 19  | An_arthuri_RO08_104          | +     | +   | +   |
| 20  | An_arthuri_RO8_1             | +     | +   | +   |
| 21  | An_arthuri_SP31_120          | +     | +   | +   |
| 22  | An_atacamensis_GQ902966      |       |     | +   |
| 23  | An_atacamensis_GQ902967      |       |     | +   |
| 24  | An_atacamensis_JF923686      |       |     | +   |
| 25  | An_benarrochi_AC15_109       | +     | +   | +   |
| 26  | An_benarrochi_AC18_115       | +     | +   | +   |
| 27  | An_benarrochi_AC18_117       | +     | +   | +   |
| 28  | An_benarrochi_AC18_120       | +     | +   | +   |
| 29  | An_braziliensis_AP21_39_3    | +     | +   | +   |
| 30  | An_braziliensis_SP16_03      | +     | +   | +   |
| 31  | An_cruzii_ST16               | +     | +   | +   |
| 32  | An_darlingi_AC20_21_100      | +     | +   | +   |
| 33  | An_darlingi_AP13_03_06       | +     | +   | +   |
| 34  | An_darlingi_AP17_01_10       | +     | +   | +   |
| 35  | An_deaneorum_AC01_07         | +     | +   | +   |
| 36  | An_deaneorum_AC02_02         | +     | +   | +   |
| 37  | An_deaneorum_MS08_127        | +     | +   | +   |
| 38  | An_dunhami_BRAM13_06         | +     | +   | +   |
| 39  | An_dunhami_BRAM13_07         | +     | +   | +   |
| 40  | An_dunhami_BRAM13_113        | +     | +   | +   |
| 41  | An_evansae_PR19_10_104       | +     | +   | +   |
| 42  | An_evansae_SP12_28           | +     | +   | +   |
| 43  | An_evansae_SP12_44           | +     | +   | +   |
| 44  | An_evansae_SP18_106          | +     | +   | +   |
| 45  | An_evansae_SP18_27           | +     | +   | +   |
| 46  | An_evansae_VP06_7_4          | +     | +   | +   |
| 47  | An_galvaoui_PR19_2_101       | +     | +   | +   |
| 48  | An_galvaoui_SP18_111         | +     | +   | +   |
| 49  | An_galvaoui_SP66_20_1        | +     | +   | +   |
| 50  | An_goeldii_BRAM03_01         | +     | +   | +   |
| 51  | An_goeldii_BRAM22_101        | +     | +   | +   |
| 52  | An_goeldii_PA7_02_02         | +     | +   | +   |
| 53  | An_goeldii_PA7_03_08         | +     | +   | +   |
| 54  | An_goeldii_PA7_04_03         | +     | +   | +   |
| 55  | An_goeldii_PA7_17_02         | +     | +   | +   |
| 56  | An_guarani_PR29              | +     | +   | +   |
| 57  | An_guarani_PR29_08           |       |     | +   |
| 58  | An_guarani_PR29_09_06        |       |     | +   |
| 59  | An_intermedius_SP22_106      | +     | +   | +   |
| 60  | An_kompi_SP69_22_5           | +     | +   | +   |
| 61  | An_konderi_AC18_16           | +     | +   | +   |
| 62  | An_konderi_AP15_11           | +     | +   | +   |
| 63  | An_konderi_AP21_43           | +     | +   | +   |
| 64  | An_konderi_AP25_11_24        | +     | +   | +   |
| 65  | An_konderi_AP25_1_100        | +     | +   | +   |
| 66  | An_konderi_PR06_2_13         | +     | +   | +   |
| 67  | An_konderi_PR14_1_9          | +     | +   | +   |
| 68  | An_konderi_PR14_3_17         | +     | +   | +   |
| 69  | An_konderi_PR14_9_108        | +     | +   | +   |
| 70  | An_konderi_RO18_1_6          | +     | +   | +   |
| 71  | An_lanei_CJ02_02             | +     | +   | +   |
| 72  | An_lanei_CJ02_03             | +     | +   | +   |
| 73  | An_lutzii_A325               | +     | +   | +   |
| 74  | An_lutzii_B369               | +     | +   | +   |
| 75  | An_lutzii_SPO2_10_5          | +     |     | +   |
| 76  | An_lutzii_SPO2_11_9          | +     | +   | +   |
| 77  | An_lutzii_SPO2_12_1          | +     | +   | +   |
| 78  | An_lutzii_SPO2_13_3          | +     | +   | +   |
| 79  | An_lutzii_SPO2_14_6          | +     | +   | +   |
| 80  | An_lutzii_SPO2_15_5          | +     | +   | +   |
| 81  | An_lutzii_SPO2_9_2           | +     | +   | +   |
| 82  | An_lutzii_sl1_RS16a          | +     | +   | +   |
| 83  | An_lutzii_sl1_RS16b          | +     | +   | +   |
| 84  | An_lutzii_sl2_RS19_13        | +     | +   | +   |
| 85  | An_lutzii_sl2_RS19_21        | +     | +   | +   |
| 86  | An_lutzii_sl2_RS19_22        | +     | +   | +   |
| 87  | An_lutzii_sl2_RS33_105       | +     | +   | +   |
| 88  | An_lutzii_sl2_RS33_3         | +     | +   | +   |
| 89  | An_lutzii_sl2_RS33a          | +     | +   | +   |
| 90  | An_lutzii_sl2_RS33b          | +     | +   | +   |
| 91  | An_marajoara_AP21_50_1       | +     | +   | +   |
| 92  | An_marajoara_AP5_01_04       | +     | +   | +   |
| 93  | An_marajoara_PA3_1_13        | +     | +   | +   |
| 94  | An_nuneztovari_RO1_107       | +     | +   | +   |
| 95  | An_nuneztovari_RO20_02_03    | +     | +   | +   |
| 96  | An_nuneztovari_RO2_13        | +     | +   | +   |
| 97  | An_nuneztovari_RO4_02        | +     | +   | +   |
| 98  | An_oryzalinmetes_SP09_03     | +     | +   | +   |
| 99  | An_oswaldoi_ES08_11_07       |       |     | +   |
| 100 | An_oswaldoi_SP03_06          | +     | +   | +   |
| 101 | An_oswaldoi_SP22_9           | +     | +   | +   |
| 102 | An_oswaldoi_sl_AC18_102      | +     | +   | +   |
| 103 | An_oswaldoi_sl_AC18_107      | +     | +   | +   |
| 104 | An_oswaldoi_sl_PA_15_C1F2    | +     | +   | +   |
| 105 | An_oswaldoi_sl_PA_15_C2F4    |       |     | +   |
| 106 | An_oswaldoi_sl_PA_15_C2F7    |       |     | +   |
| 107 | An_parvus_AS5_1              | +     | +   | +   |
| 108 | An_parvus_AS5_2              | +     | +   | +   |
| 109 | An_parvus_AS5_3              | +     | +   | +   |
| 110 | An_parvus_AS5_4              | +     | +   | +   |
| 111 | An_parvus_MG07_9_1           | +     | +   | +   |
| 112 | An_parvus_MG56_2             | +     | +   | +   |
| 113 | An_parvus_PR28_18_1          | +     | +   | +   |
| 114 | An_parvus_PR28_5_1           | +     | +   | +   |
| 115 | An_parvus_PR28_65_6          | +     | +   | +   |
| 116 | An_pristinus_SP50a           | +     | +   | +   |
| 117 | An_pristinus_SP50b           | +     | +   | +   |
| 118 | An_pristinus_SP51_100        | +     | +   | +   |
| 119 | An_pristinus_SP53_100        | +     | +   | +   |
| 120 | An_pristinus_SP53_101        | +     | +   | +   |
| 121 | An_pristinus_SP53_4          | +     | +   | +   |
| 122 | An_pristinus_SP53_5          | +     | +   | +   |
| 123 | An_pristinus_SP55_2          | +     | +   | +   |
| 124 | An_pristinus_SP55_4          | +     | +   | +   |
| 125 | An_pristinus_VP11a           | +     |     | +   |
| 126 | An_rangeli_AC15_04           | +     |     | +   |
| 127 | An_rangeli_AC18_110          | +     | +   | +   |
| 128 | An_rangeli_RO18_8_2          | +     | +   | +   |
| 129 | An_rondoni_PR28_34_100       | +     | +   | +   |
| 130 | An_rondoni_PR28_36_02        | +     | +   | +   |
| 131 | An_rondoni_PR28_55_100       | +     | +   | +   |
| 132 | An_strodei_CPform_ES20_4_1   | +     | +   | +   |
| 133 | An_strodei_CPform_MG15_01_01 | +     | +   | +   |
| 134 | An_strodei_CPform_MG15_06_12 | +     | +   | +   |
| 135 | An_strodei_CPform_PR21_110   | +     | +   | +   |
| 136 | An_strodei_ES09_1            | +     | +   | +   |
| 137 | An_strodei_MG30_102          | +     | +   | +   |
| 138 | An_strodei_SPRO4_07          | +     | +   | +   |
| 139 | An_strodei_VP06_05_01        | +     | +   | +   |
| 140 | An_triannulatus_AC1_108      | +     | +   | +   |
| 141 | An_triannulatus_AP17_04_01   | +     | +   | +   |
| 142 | An_triannulatus_ES03_03_01   | +     | +   | +   |
| 143 | An_triannulatus_MG56_12_03   | +     | +   | +   |
| 144 | An_triannulatus_SPO9_02      | +     | +   | +   |
