# Supplementary material for: Phylogenetic Analysis and DNA-based Species Confirmation in Anopheles (Nyssorhynchus)
Source: PLoS One. 2013 Feb 4;8(2):e54063. doi: 10.1371/journal.pone.0054063 (PMC3563636; doi:10.1371/journal.pone.0054063)
Supplement: Table S6 — Specimen collection locations and details. (XLS) [file pone.0054063.s008.xls]

## Sheet: Plan1
Species	Sample ID	Collection data	State	Municipality	Location	Sex	Latitude	Longitude	Collector	COI Genbank	White Genbank	CAD Genbank
Anopheles albertoi	MG07_7_10	21/11/2006	Minas Gerais	Frutal	Fazenda Brejão, Sítio Paraíso, Rodovia Frutal Itapegipe Km 14	♀	-20.025278	-49.0765	Bergo et al.	GU226677	GU226743, -44, -45, -46*	KC167185, -86*
Anopheles albertoi	MG07_12_4	21/11/2006	Minas Gerais	Frutal	Fazenda Brejão, Sítio Paraíso, Rodovia Frutal Itapegipe Km 14	♀	-20.0253	-49.0765	Bergo et al.	GU226678	GU226747	KC167187
Anopheles albitarsis	MG11_20_3	22/11/2006	Minas Gerais	Planura	Fazenda Natividade, Road BR364 Km 6	♂	-20.1206	-48.7184	Bergo et al.	JN413684	JN413713	KC167188
Anopheles albitarsis	SP104_2_2	2010-10-27	São Paulo	Pindamonhangaba	Instituto Agronômico de Campinas	♂	-22.9605	-45.4521	Bergo et al.	JN413685	JN413714	KC167189
Anopheles albitarsis	VP06_01_01	26/10/2006	São Paulo	Pindamonhangaba	Instituto Agronômico de Campinas	♂	-22.9597	-45.4524	Sallum et al.	JF923680	FJ147265	KC167190
Anopheles antunesi	RJ03_6	25/03/2008	Rio de Janeiro	Itatiaia	Parque Nacional do Itatiaia	♀	-22.4163	-44.6221	Nagaki & Motta	GU989342	JN392473	KC167191
Anopheles antunesi	RJ03_11	25/03/2008	Rio de Janeiro	Itatiaia	Parque Nacional do Itatiaia	♀	-22.4163	-44.6221	Nagaki & Motta	GU989343	JN392474	KC167192
Anopheles antunesi	RJ03_12	25/03/2008	Rio de Janeiro	Itatiaia	Parque Nacional do Itatiaia	♀	-22.4163	-44.6221	Nagaki & Motta	GU989344	JN392475	KC167193, -94, -95*
Anopheles antunesi	RJ03_13	25/03/2008	Rio de Janeiro	Itatiaia	Parque Nacional do Itatiaia	♀	-22.4163	-44.6221	Nagaki & Motta	GU989345	JN392476	KC167196
Anopheles antunesi	VP09_17	2006-10-27	São Paulo	Pindamonhangaba	Pico do Itapeva, Fazenda Saint Clair	♂	-45.5155	-22.7588	Sallum et al.	GU989346	JN392477	KC167197
Anopheles antunesi	VP11b	2006-10-27	São Paulo	Pindamonhangaba	Pico do Itapeva, Fazenda Saint Clair	♂	-45.5155	-22.7588	Sallum et al.	GU989347	FJ147290	-
Anopheles argyritarsis	CE17_14_100	22/07/2010	Ceará	Ubajara	Sítio Macacos	♂	-3.84422	40.8978	Sallum et al.	JF923681	JN413715	KC167318, -19, -20*
Anopheles argyritarsis	CE20_18_A	22/07/2010	Ceará	Ubajara	Sítio Macacos	♂	-3.84422	40.8978	Sallum et al.	JF923682	JN413716	KC167321, -22*
Anopheles argyritarsis	CE20_8_3	22/07/2010	Ceará	Ubajara	Sítio Macacos	♂	-3.84422	40.8978	Sallum et al.	JF923683	JN413717	KC167323
Anopheles argyritarsis	MG04_03	21/11/2006	Minas Gerais	Frutal	Fazenda Cerradão	♀	-19.9885	-49.0934	Bergo et al.	JF923684	FJ147280	KC167198
Anopheles argyritarsis l.s.	MG25_4	30/11/2008	Minas Gerais	Goianá	Aeroporto	♂	-21.5388	-46.2009	Bergo et al.	JF923685	JN413718	KC167199
Anopheles arthuri	MG07_6_3	21/11/2006	Minas Gerais	Frutal	Fazenda Brejão, Sítio Paraíso, Rodovia Frutal Itapegipe Km14	♂	-20.0253	-49.0765	Bergo et al.	GU226681	GU226749	KC167200
Anopheles arthuri	MG24_1	2008-11-30	Minas Gerais	Goianá	Aeroporto	♂	-21.5388	-43.2009	Bergo et al.	GU226682	GU226757	KC167201
Anopheles arthuri	RO8_1	2008-01-10	Rondônia	Monte Negro	Gleba Amir Lando, Linha 25	♂	-10.2686	-63.5554	Bergo et al.	GU226688	GU226759	KC167202
Anopheles arthuri	RO8_104	2008-01-10	Rondônia	Monte Negro	Gleba Amir Lando, Linha 25	♂	-10.2686	-63.5554	Bergo et al.	GU226690	GU226760	KC167203
Anopheles arthuri	SP31_120	2008-02-04	São Paulo	Inúbia Paulista	Rio Lageado, Fazenda Oroetê	♂	-21.6814	-50.9199	Bergo et al.	GU226687	GU226758	KC167204
Anopheles atacamensis	-	25/05/2006	Huasco Prov.	Quebrada Honda, El Sarco	Deserto do Atacama, região III - Norte do Chile	♀	-28.2167	-71.1167	C. Array	JF923686	-	-
Anopheles atacamensis	-	25/05/2006	Huasco Prov.	Quebrada Honda, El Sarco	Deserto do Atacama, região III - Norte do Chile	♀	-28.2167	-71.1167	C. Array	GQ902966	-	-
Anopheles atacamensis	-	25/05/2006	Huasco Prov.	Quebrada Honda, El Sarco	Deserto do Atacama, região III - Norte do Chile	♀	-28.2167	-71.1167	C. Array	GQ902967	-	-
Anopheles benarrochi	AC15_109	2006-07-10	Acre	Acrelândia	Ramal do Granada, Linha 14	♂	-9.68431	-67.1348	Sallum & Laporta	JF923687	JN413753	KC167205
Anopheles benarrochi	AC18_115	2006-07-10	Acre	Acrelândia	Ramal do Granada, Linha 14	♂	-9.68431	-67.1348	Sallum & Laporta	JF923688	JN413754	KC167206
Anopheles benarrochi	AC18_117	2006-07-10	Acre	Acrelândia	Ramal do Granada, Linha 14	♂	-9.68431	-67.1348	Sallum & Laporta	JF923689	JN413755	KC167207
Anopheles benarrochi	AC18_120	2006-07-10	Acre	Acrelândia	Ramal do Granada, Linha 14	♂	-9.68431	-67.1348	Sallum & Laporta	JF923726	FJ147268	KC167208
Anopheles braziliensis	AP21_39_3	26/07/2006	Amapá	Macapá	São José do Mata Fome	♂	0.213139	-50.9722	Sallum et al.	JF923690	FJ147253	KC167209
Anopheles braziliensis	SP16_03	28/06/2006	São Paulo	Dourado	Fazenda Serrote	♂	-22.0926	-48.4284	Sallum et al.	JF923691	FJ147254	KC167210
Anopheles cruzii	ST16	23/10/2007	São Paulo	Cananéia	Distrito Aroeira, Sítio Itapuan	♂	-25.0167	-47.95	Sallum et al.	JF923692	JN413719	KC167211
Anopheles darlingi	AC20_21_100	13/07/2006	Acre	Acrelândia	Assentamento Orion, Linha 5	♂	-10.1233	-66.9107	Sallum & Laporta	JF923693	FJ147257	KC167212
Anopheles darlingi	AP13_03_06	24/07/2006	Amapá	Macapá	São José do Mata Fome	♂	0.213139	-50.9722	Bergo et al.	JF923694	FJ147255	KC167213
Anopheles darlingi	AP17_01_10	25/07/2006	Amapá	Macapá	Abacate da Pedreira, Sítio Santa Bárbara	♂	0.271528	-50.8981	Bergo et al.	JF923695	FJ147256	KC167214
Anopheles deaneorum	AC01_07	2006-07-05	Acre	Acrelândia	Ramal do Granada, Gleba Q, Reserva 28	♂	-9.70436	-67.0913	Sallum & Laporta	JF923696	FJ147285	KC167215
Anopheles deaneorum	AC02_02	2006-07-05	Acre	Acrelândia	Ramal do Granada, Gleba Q, Reserva 28	♂	-9.70906	-67.1017	Sallum & Laporta	JF923697	FJ147286	KC167216
Anopheles deaneorum	MS08_127	2008-02-09	Mato Grosso do Sul	Aquidauana	Instituto de Pesquisa do Pantanal, Pantanal de Aquidauana	♂	-19.5083	-55.6284	Bergo et al.	JN413686	JN413720	KC167217
Anopheles dunhami	BRAM13_06	2005-06-06	Amazonas	Parintins	Rio Mamuru/Rio Paraná do Ramos, Assentamento Vila Amazonia	♂	-2.62778	-56.7358	Sallum	JF923698	EU848336	KC167218
Anopheles dunhami	BRAM13_07	2005-06-06	Amazonas	Parintins	Rio Mamuru/Rio Paraná do Ramos, Assentamento Vila Amazonia	♂	-2.62778	-56.7358	Sallum	JF923699	EU848333	KC167219, -20*
Anopheles dunhami	BRAM13_113	2005-06-06	Amazonas	Parintins	Rio Mamuru/Rio Paraná do Ramos, Assentamento Vila Amazonia	♂	-2.62778	-56.7358	Sallum	JF923700	EU848335	KC167221
Anopheles evansae	PR19_10_104	26/02/2007	Paraná	Santa Helena	Refúgio Biológico de Santa Helena	♂	-24.863	-54.353	Bergo et al.	JN413687	JN413721	KC167222
Anopheles evansae	SP12_28	28/06/2006	São Paulo	Dourado	Fazenda Santa Leonor	♂	-22.0743	-48.4447	Bergo et al.	JF923701	FJ147258	KC167223
Anopheles evansae	SP12_44	28/06/2006	São Paulo	Dourado	Fazenda Santa Leonor	♂	-22.0743	-48.4447	Bergo et al.	JN413688	JN413722	KC167224
Anopheles evansae	SP18_27	29/06/2006	São Paulo	Dourado	Fazenda Santa Gertrudes	♂	-22.1353	-48.3911	Bergo et al.	JF923702	FJ147259	-
Anopheles evansae	SP18_106	29/06/2006	São Paulo	Dourado	Fazenda Santa Gertrudes	♂	-22.1353	-48.3911	Bergo et al.	JN413689	JN413723	KC167225
Anopheles evansae	VP06_7_4	26/10/2006	São Paulo	Pindamonhangaba	Instituto Agronômico de Campinas	♂	-22.9597	-45.4524	Sallum et al.	JN413690	JN413724	KC167226
Anopheles galvaoi	PR19_2_101	26/02/2007	Paraná	Santa Helena	Refúgio Biológico de Santa Helena	♂	-24.863	-54.353	Bergo et al.	JN413691	JN413725	KC167227
Anopheles galvaoi	SP18_111	29/06/2006	São Paulo	Dourado	Fazenda Santa Gertrudes	♂	-22.1353	-48.3911	Bergo et al.	JF923703	FJ147260	KC167228
Anopheles galvaoi	SP66_20_1	2009-05-05	São Paulo	Dourado	Fazenda Santana	♂	-22.1347	-48.3917	Bergo et al.	JN413692	JN413726	-
Anopheles goeldii	BRAM03_01	2005-06-01	Amazonas	Itacoatiara	-	♂	-3.14675	-58.3944	Hutchings & Sallum	JF923704	EU848401	-
Anopheles goeldii	BRAM22_101	2005-06-11	Pará	Prainha	Comunidade Terra Preta	♂	-2.08036	-53.5909	Sallum	JF923705	EU848414	KC167229
Anopheles goeldii	PA7_02_02	2008-10-10	Pará	Belterra	São Domingos	♂	-2.752	-55.018	Bergo et al.	JF923706	JN413727	KC167230
Anopheles goeldii	PA7_03_08	2008-10-10	Pará	Belterra	São Domingos	♂	-2.752	-55.018	Bergo et al.	JF923707	JN413728	KC167231
Anopheles goeldii	PA7_04_03	2008-10-10	Pará	Belterra	São Domingos	♂	-2.752	-55.018	Bergo et al.	JF923708	JN413729	KC167232
Anopheles goeldii	PA7_17_02	2008-10-10	Pará	Belterra	São Domingos	♂	-2.752	-55.018	Bergo et al.	JF923709	JN413730	-
Anopheles nuneztovari	RO1_107	08/01/2008	Rondônia	Monte Negro	Rio Jamari	♂	-10.2975	-63.2683	Bergo et al.	JF923710	JN413756	KC167233, KC167324*
Anopheles nuneztovari	RO2_13	2008-01-08	Rondônia	Monte Negro	Rio Jamari	♀	-10.301	-63.2359	Bergo et al.	JF923711	JN413757	KC167234
Anopheles nuneztovari	RO4_02	2008-01-09	Rondônia	Monte Negro	Rio Jamari	♂	-10.2989	-63.2396	Bergo et al.	JF923712	JN413758	KC167235
Anopheles nuneztovari	RO20_02_03	2008-01-15	Rondônia	Monte Negro	Fazenda Boa Sorte, Road BR421	♂	-10.2841	-63.3041	Bergo & Sallum	JF923713	JN413759	KC167236
Anopheles guarani	PR29	28/04/2008	Paraná	Foz do Iguaçu	Rio Almada	♀	-25.4806	-54.5867	Nagaki & Silva	JF923659	JN392478	KC167237*
Anopheles guarani	PR29_08	28/04/2008	Paraná	Foz do Iguaçu	Rio Almada	♀	-25.4806	-54.5867	Nagaki & Silva	JF923660	-	-
Anopheles guarani	PR29_09_06	28/04/2008	Paraná	Foz do Iguaçu	Rio Almada	♂	-25.4806	-54.5867	Nagaki & Silva	JF923661	-	-
Anopheles intermedius	SP22_106	15/05/2007	São Paulo	Pariquera-Açu	Pariquera-Mirim	♂	-24.7171	-47.8834	Bergo	JF923714	FJ147292	KC167238
Anopheles kompi	SP69_22_5	2009-05-07	São Paulo	Dourado	Rodovia Comandante João Ribeiro de Barros SP 255 com Rodovia Luís Augusto de Oliveira, Obelisco	♂	-22.0757	-48.4374	Sallum et al.	JF923715	JN413731	-
Anopheles konderi	AC18_16	2006-07-10	Acre	Acrelândia	Ramal do Granada, Linha 14	♂	-96.8445	-67.1359	Sallum & Laporta	JF437965	JF437975	KC167239
Anopheles konderi	AP15_11	25/07/2006	Amapá	Macapá	Abacate da Pedreira, Sítio Santa Bárbara	♂	0.271477	-50.8986	Bergo et al.	JF437966	JF437976	KC167240
Anopheles konderi	AP21_43	26/07/2006	Amapá	Macapá	São José do Mata Fome	♀	0.213087	-50.9726	Bergo et al.	JF923716	FJ147262	KC167241
Anopheles konderi	AP25_1_100	31/05/2007	Amapá	Macapá	São João do Matapi	♂	0.033252	-51.0504	Galardo et al.	JF437967	JF437977	KC167242
Anopheles konderi	AP25_11_24	31/05/2007	Amapá	Macapá	São João do Matapi	♂	0.033252	-51.0504	Galardo et al.	JF437968	JF437978	KC167243
Anopheles konderi	PR06_2_13	22/02/2007	Paraná	Porto Natal	Ilha do Frade	♂	-23.0634	-53.6251	Bergo et al.	JF437969	JF437979	KC167244
Anopheles konderi	PR14_1_9	24/02/2007	Paraná	Porto Rico	Serraria Paulista	♂	-22.7722	-53.2669	Bergo et al.	JF437970	JF437980	KC167245
Anopheles konderi	PR14_9_108	24/02/2007	Paraná	Porto Rico	Serraria Paulista	♂	-22.7722	-53.2669	Bergo et al.	JF437972	JF437982	KC167246
Anopheles konderi	PR14_3_17	24/02/2007	Paraná	Porto Rico	Serraria Paulista	♂	-22.7722	-53.2669	Bergo et al.	JF437971	JF437981	KC167247
Anopheles konderi	RO18_1_6	14/01/2008	Rondônia	Monte Negro	Rio Jamari	♂	-10.301	-63.2359	Bergo et al.	JF437974	JF437984	KC167248
Anopheles lanei	CJ02_02	17/02/2006	São Paulo	Pindamonhangaba	Pico do Itapeva, Fazenda Saint Clair	♀	-22.7639	-45.5002	Sallum & Senise	JF923717	FJ147281	KC167249, -50, -51*
Anopheles lanei	CJ02_03	17/02/2006	São Paulo	Pindamonhangaba	Pico do Itapeva, Fazenda Saint Clair	♂	-22.7639	-45.5002	Sallum & Senise	JF923718	FJ147282	KC167252
Anopheles lutzii	A325	23/04/2008	Rio Grande do Sul	Maquiné	Fundação Estadual de Pesquisa Agropecuária (FEPAGRO)	♀	-29.6608	-50.2196	Cardoso et al.	JF923662	JN392479	KC167253
Anopheles lutzii	B369	23/04/2008	Rio Grande do Sul	Maquiné	Fundação Estadual de Pesquisa Agropecuária (FEPAGRO)	♀	-29.6608	-50.2196	Cardoso et al.	JF923663	JN392480, -81, -82*	KC167254
Anopheles lutzii	SP02_9_2	17/04/2006	São Paulo	Pariquera-Açu	Sítio Galiléia	♂	-24.4498	-47.5694	Sallum et al.	JF923664	FJ147283	KC167255
Anopheles lutzii	SP02_10_05	17/04/2006	São Paulo	Pariquera-Açu	Sítio Galiléia	♂	-24.4498	-47.5694	Sallum et al.	JF923665	FJ147284	-
Anopheles lutzii	SP02_11_9	17/04/2006	São Paulo	Pariquera-Açu	Sítio Galiléia	♂	-24.4498	-47.5694	Sallum et al.	JF923666	JN392483	KC167256
Anopheles lutzii	SP02_12_1	17/04/2006	São Paulo	Pariquera-Açu	Sítio Galiléia	♂	-24.4498	-47.5694	Sallum et al.	JF923667	JN392484	KC167257
Anopheles lutzii	SP02_13_3	17/04/2006	São Paulo	Pariquera-Açu	Sítio Galiléia	♂	-24.4498	-47.5694	Sallum et al.	JF923668	JN392485	KC167258
Anopheles lutzii	SP02_14_6	17/04/2006	São Paulo	Pariquera-Açu	Sítio Galiléia	♂	-24.4498	-47.5694	Sallum et al.	JF923669	JN392486	KC167259*
Anopheles lutzii	SP02_15_5	17/04/2006	São Paulo	Pariquera-Açu	Sítio Galiléia	♂	-24.4498	-47.5694	Sallum et al.	JF923670	JN392487	KC167260
Anopheles lutzii l.s. Form 1	RS16a	13/01/2011	Rio Grande do Sul	São Francisco do Sul	-	Larva	-29.4973	-50.3511	Bergo et. al.	JN413693	JN413732	KC167261
Anopheles lutzii l.s. Form 1	RS16b	13/01/2011	Rio Grande do Sul	São Francisco do Sul	-	Larva	-29.4973	-50.3511	Bergo et. al.	JN413694	JN413733	KC167262
Anopheles lutzii l.s. Form 2	RS19_13	14/01/2011	Rio Grande do Sul	Maquiné	Barra do Ouro	Pupa	-29.5902	-50.2617	Sallum et al.	JN413695	JN413734	KC167263
Anopheles lutzii l.s. Form 2	RS19_21	14/01/2011	Rio Grande do Sul	Maquiné	Barra do Ouro	Pupa	-29.5902	-50.2617	Sallum et al.	JN413696	JN413735	KC167264
Anopheles lutzii l.s. Form 2	RS19_22	14/01/2011	Rio Grande do Sul	Maquiné	Barra do Ouro	Pupa	-29.5902	-50.2617	Sallum et al.	JN413697	JN413736	KC167265
Anopheles lutzii l.s. Form 2	RS33a	17/01/2011	Rio Grande do Sul	Maquiné	Barra do Ouro	Larva	-29.5896	-50.2626	Sallum et al.	JN413698	JN413737	KC167314
Anopheles lutzii l.s. Form 2	RS33b	17/01/2011	Rio Grande do Sul	Maquiné	Barra do Ouro	Larva	-29.5896	-50.2626	Sallum et al.	JN413699	JN413738	KC167315
Anopheles lutzii l.s. Form 2	RS33_3	17/01/2011	Rio Grande do Sul	Maquiné	Barra do Ouro	♂	-29.5896	-50.2626	Sallum et al.	JN413700	JN413739	KC167316
Anopheles lutzii l.s. Form 2	RS33_105	17/01/2011	Rio Grande do Sul	Maquiné	Barra do Ouro	Pupa	-29.5896	-50.2626	Sallum et al.	JN413701	JN413740	KC167317
Anopheles marajoara	AP5_01_04	21/07/2006	Amapá	Macapá	Reserva de Curiaú	♂	0.138444	-51045639	Bergo et al.	JF923719	FJ147263	KC167266
Anopheles marajoara	AP21_50_1	26/07/2006	Amapá	Macapá	São José do Mata Fome	♂	0.213139	-50.9722	Bergo et al.	JN413702	JN413741	KC167267
Anopheles marajoara	PA3_1_13	08/10/2008	Pará	Santarém	Urumanduba	♂	-2.48228	-54.6609	Bergo et al.	JN413703	JN413742	KC167268
Anopheles oryzalimnetes	SP09_03	27/06/2006	São Paulo	Dourado	Sítio Boa Vista do Potreiro	♂	-22.0701	-48.4446	Bergo	JF923720	FJ147264	KC167269
Anopheles oswaldoi	ES08_11_07	18/01/2006	Espírito Santo	Jaguaré	Fazenda Marianelli, Lagoa do Macuco	♂	-19.0209	-39.5691	Natal et al.	JF923721	FJ147266	-
Anopheles oswaldoi	SP03_06_	18/04/2006	São Paulo	Pariquera-Açu	Pariquera-Mim	♂	-24.7171	-47.8834	Sallum et al.	JF923724	FJ147267	KC167270
Anopheles oswaldoi	SP22_9	15/05/2007	São Paulo	Pariquera-Açu	Pariquera-Mirim	♀	-22.6337	-47.8837	Sallum	JN413704	JN413743	KC167271
Anopheles oswaldoi l.s.	AC18_102	2006-07-10	Acre	Acrelândia	Ramal do Granada, Linha 14	♂	-9.68445	-67.1359	Sallum & Laporta	JF923722	JN413744	KC167272
Anopheles oswaldoi l.s.	AC18_107	2006-07-10	Acre	Acrelândia	Ramal do Granada, Linha 14	♂	-9.68445	-67.1359	Sallum & Laporta	JF923723	JN413745	KC167273
Anopheles oswaldoi l.s.	PA_15_C1F2	2010-06-20	Pará	Bom Jesus do Tocantins	Chácara Souza & Souza	♀	-5.26881	-48.9427	Silva et al.	JN413705	JN413746	KC167274
Anopheles oswaldoi l.s.	PA_15_C2F4	2010-03-06	Pará	Marabá	Margem direita, Rio Tocantins	♀	-5.31753	-49.0388	Silva et al.	JN413706	-	KC167275
Anopheles oswaldoi l.s.	PA_15_C2F7	14-15/09/2010	Pará	Bom Jesus do Tocantins	Chácara Souza & Souza	♀	-5.26881	-48.9427	Silva et al.	JN413707	-	KC167276
Anopheles parvus	AS5_1	27/07/2010	Goiás	Pilar de Goiás	-	♀	-14.8092	-49.5398	Nagaki et al.	JF923671	JN392488*	KC167277
Anopheles parvus	AS5_2	27/07/2010	Goiás	Pilar de Goiás	-	♀	-14.8092	-49.5398	Nagaki et al.	JF923672	JN392489, -90, -91*	KC167278
Anopheles parvus	AS5_3	27/07/2010	Goiás	Pilar de Goiás	-	♀	-14.8092	-49.5398	Nagaki et al.	JF923673	JN392492, -93*	KC167279
Anopheles parvus	AS5_4	27/07/2010	Goiás	Pilar de Goiás	-	♀	-14.8092	-49.5398	Nagaki et al.	JF923674	JN392494, -95*	KC167280
Anopheles parvus	MG07_9_1	21/11/2006	Minas Gerais	Frutal	Fazenda Brejão, Sítio Paraíso, Rodovia Frutal Itapegipe Km14	♂	-20.0256	-49.0769	Bergo et al.	JF923675	FJ147287	KC167281
Anopheles parvus	MG56_2	2010-04-14	Minas Gerais	Campo Belo	Rodovia Oliveira - Campo Belo, BR369, KM33	♀	-20.7952	-45.1218	Bergo et al.	JF923676	JN392496, -97*	KC167282
Anopheles parvus	PR28_5_1	2007-05-04	Paraná	Guaíra	Doutor Oliveira Castro	♂	-24.2715	-54.2906	Silva et al.	JF923677	JN392498	KC167283
Anopheles parvus	PR28_18_1	2007-05-04	Paraná	Guaíra	Doutor Oliveira Castro	♂	-24.2715	-54.2906	Silva et al.	JF923678	FJ147288	KC167284
Anopheles parvus	PR28_65_6	2007-05-04	Paraná	Guaíra	Doutor Oliveira Castro	♂	-24.2715	-54.2906	Silva et al.	JF923679	JN392499	KC167285
Anopheles pristinus	SP50a	27/01/2009	São Paulo	Pindamonhangaba	Pico do Itapeva, Fazenda Saint Clair	♀	-22.7585	-45.5153	Nagaki et al	GU989351	JN392500	KC167286
Anopheles pristinus	SP50b	27/01/2009	São Paulo	Pindamonhangaba	Pico do Itapeva, Fazenda Saint Clair	♀	-22.7585	-45.5153	Nagaki et al	GU989352	JN392501	KC167287
Anopheles pristinus	SP51_100	27/01/2009	São Paulo	Pindamonhangaba	Pico do Itapeva, Fazenda Saint Clair	♀	-22.7585	-45.5153	Nagaki et al	GU989353	JN392502	KC167288
Anopheles pristinus	SP53_4	27/01/2009	São Paulo	Pindamonhangaba	Pico do Itapeva, Fazenda Saint Clair	Pupa	-22.7585	-45.5153	Nagaki et al	GU989354	JN392503	KC167289
Anopheles pristinus	SP53_5	27/01/2009	São Paulo	Pindamonhangaba	Pico do Itapeva, Fazenda Saint Clair	Pupa	-22.7585	-45.5153	Nagaki et al	GU989355	JN392504	KC167290
Anopheles pristinus	SP53_100	27/01/2009	São Paulo	Pindamonhangaba	Pico do Itapeva, Fazenda Saint Clair	♂	-22.7585	-45.5153	Nagaki et al	GU989356	JN392505	KC167291
Anopheles pristinus	SP53_101	27/01/2009	São Paulo	Pindamonhangaba	Pico do Itapeva, Fazenda Saint Clair	♀	-22.7585	-45.5153	Nagaki et al	GU989357	JN392506	KC167292
Anopheles pristinus	SP55_2	27/01/2009	São Paulo	Pindamonhangaba	Pico do Itapeva, Fazenda Saint Clair	♀	-22.7585	-45.5153	Nagaki et al	GU989358	JN392507	KC167293
Anopheles pristinus	SP55_4	27/01/2009	São Paulo	Pindamonhangaba	Pico do Itapeva, Fazenda Saint Clair	♀	-22.7585	-45.5153	Nagaki et al	GU989359	JN392508	KC167294
Anopheles pristinus	VP11a	27/07/2006	São Paulo	Pindamonhangaba	Pico do Itapeva, Fazenda Saint Clair	♀	-22.7585	-45.5153	Nagaki et al	GU989348	FJ147289	-
Anopheles rangeli	AC15_04	2006-07-10	Acre	Acrelândia	Ramal do Granada, Linha 14	♂	-9.68431	-67.1348	Sallum & Laporta	JF923725	FJ147269	-
Anopheles rangeli	AC18_110	2006-07-10	Acre	Acrelândia	Ramal do Granada, Linha 14	♂	-9.68431	-67.1348	Sallum & Laporta	JN413708	JN413747	KC167295
Anopheles rangeli	RO18_8_2	2008-01-14	Rondônia	Monte Negro	Rio Jamari	♂	-10.301	-63.2359	Bergo et al.	JN413709	JN413748	KC167296
Anopheles rondoni	PR28_34_100	2007-05-04	Paraná	Guaíra	Doutor Oliveira Castro	♂	-24.2715	-54.2906	Silva et al.	JF923727	FJ147277	KC167297
Anopheles rondoni	PR28_36_02	2007-05-04	Paraná	Guaíra	Doutor Oliveira Castro	♀	-24.2715	-54.2906	Silva et al.	JF923728	FJ147279	KC167298, -99, 300*
Anopheles rondoni	PR28_55_100	2007-05-04	Paraná	Guaíra	Doutor Oliveira Castro	♂	-24.2715	-54.2906	Silva et al.	JF923729	FJ147278	KC167325, 26*
Anopheles strodei_CPform	ES20_4_1	23/10/2007	Espírito Santo	Linhares	Reserva Nat. V. R. Doce, Rio Barra Seca	♂	-19.0834	-39.8844	Bergo & Motoki	JN413710	JN413749	KC167301
Anopheles strodei_CPform	MG15_01_01	02/12/2008	Minas Gerais	Coronel Pacheco	Embrapa	♂	-21.6358	-43.3193	Bergo et al.	JN413711	JN413750	KC167302
Anopheles strodei_CPform	MG15_06_12	02/12/2008	Minas Gerais	Coronel Pacheco	Embrapa	♂	-21.6358	-43.3193	Bergo et al.	JN413712	JN413751	KC167303
Anopheles strodei_CPform	PR21_110	28/02/2007	Paraná	Foz do Iguaçu	Refúgio Biológico Bela Vista	♂	-25.455	-54.5472	Bergo et al.	GU226691	GU226762	KC167304
Anopheles strodei	ES09_1	19/01/2006	Espírito Santo	Santa Teresa	Valsugana	♂	-19.917	-40.6	Natal et al.	GU226664	GU226730	KC167305
Anopheles strodei	MG30_102	2008-12-01	Minas Gerais	Coronel Pacheco	Fazenda Fortaleza de Sant'Anna	♂	-21.6358	-43.3193	Bergo et al.	GU226670	GU226736	KC167306
Anopheles strodei	SPR04_07	19/11/2006	Paraná	São José dos Pinhais	-	♂	-25.5347	-49.2064	Calado	JF923730	FJ147272	KC167307*
Anopheles strodei	VP06_05_01	26/10/2006	São Paulo	Pindamonhangaba	Instituto Agronômico de Campinas	♂	-22.9597	-45.4524	Sallum et al.	JF923731	FJ147271	KC167308
Anopheles triannulatus	AC1_108	2006-07-05	Acre	Acrelândia	Ramal do Granada, Gleba Q, Reserva 28	♂	-9.7045	-67.0924	Sallum & Laporta	JF923732	FJ147275	KC167309
Anopheles triannulatus	AP17_04_01	25/07/2006	Amapá	Macapá	Abacate da Pedreira, Sítio Sta Bárbara	♂	0.271477	-50.8986	Bergo et al.	JF923733	FJ147274	KC167310
Anopheles triannulatus	ES03_03_01	16/01/2006	Espírito Santo	Sooretama	Córrego Cupido, Joerama A	♂	-19.0275	-40.0068	Natal et al.	JF923734	FJ147273	KC167311
Anopheles triannulatus	MG56_12_03	2010-04-14	Minas Gerais	Campo Belo	Rodovia Oliveira - Campo Belo, BR369, KM33	♂	-20.7952	-45.1218	Bergo et al.	JF923735	JN413752	KC167312
Anopheles triannulatus	SP09_02	27/06/2006	São Paulo	Dourado	Sítio Boa Vista do Potreiro	♂	-22.0701	-48.4446	Bergo et al.	JF923736	FJ147276	KC167313
