# Supplementary material for: Phylogenetic Analysis and DNA-based Species Confirmation in Anopheles (Nyssorhynchus)
Source: PLoS One. 2013 Feb 4;8(2):e54063. doi: 10.1371/journal.pone.0054063 (PMC3563636; doi:10.1371/journal.pone.0054063)
Supplement: Table S7 — DNA amplification primers. (DOC) [file pone.0054063.s009.doc]

Supplementary Table S7. DNA amplification primers.

| **Gene** | **Primer** | **Sequence 5' - 3'** | Source |
| --- | --- | --- | --- |
| COI | C1-J-1718a,b | GGA GGA TTT GGA AAT TGA TTA GTT CC | Simon et al. (1994) |
|  | C1-N-2191a,b | CCC GGT AAA ATT AAA ATA TAA ACT TC | Simon et al. (1994) |
|  |  |  |  |
|  | LCO1490b | GGT CAA CAA ATC ATA AAG ATA TTG G | Folmer et al. (1994) |
|  | HCO2198b | TAA ACT TCA GGG TGA CCA AAA AAT CA | Folmer et al. (1994) |
|  |  |  |  |
| CAD | CAD338Fc | ATG AAR TAY GGY AAT CGT GGH CAY AA | Moulton and Wiegmann (2004) |
|  | CAD680Rc | AAN GCR TCN CGN ACM ACY TCR TAY TC | Moulton and Wiegmann (2004) |
|  | CAD_Fd | CCM RSC GST GCT ACA TGA C | This study |
|  | CAD_Rd | GAT GAT GAG CTG RGY CGA GTG | This study |
|  | CAD338F_M13c | TGT AAA ACG ACG GCC AGT ATG AAR TAY GGY AAT CGT GGH CAY AA | This study |
|  | CAD680R_M13c | CAG GAA ACA GCT ATG ACC AAN GCR TCN CGN ACM ACY TCR TAY TC | This study |
|  |  |  |  |
| White | WZ2Ec | AAY TAY AAY CCI GCI GAY TTY TA | Zwiebel et al. (1995) |
|  | WZ11Xc | TTI ARR AAR AAI CCI CCR AA | Zwiebel et al. (1995) |
|  | W1Fd | GAT CAA RAA GAT CTG YGA CTC GTT | Bourke et al. (2010) |
|  | W2Rd | GCC ATC GAG ATG GAG GAG CTG | Bourke et al. (2010) |
|  |  |  |  |
| - | M13Fe | TGT AAA ACG ACG GCC AGT | - |
| - | M13Re | CAG GAA ACA GCT ATG ACC | - |

aUsed only for GQ902966 and GQ902967**. b**Used for PCR and sequencing reactions.cUsed for PCR only.dInternal primers used for sequencing reactions. eUsed for sequencing reactions of PCR products generated with CAD338F_M13 and CAD680R_M13.
